# Supplementary material for: Photoredox-catalyzed three-component carbotrifluoromethylation of alkenes via radical–radical cross-coupling
Source: Royal Society of Chemistry journal article supplement (doi:10.1039/d4qo00799a), 2024-01-01

# Supporting Information

## Photoredox-catalyzed three-component carbotrifluoromethylation of alkenes via radical-radical coupling

Lin Tang,<sup>\*,a,b</sup> Ge Lv,<sup>a</sup> Taijun Wu,<sup>a</sup> Lufang Zhang,<sup>a</sup> Xiaoyu Wang,<sup>a</sup> Fengjuan Jia,<sup>a</sup> Qiuju Zhou,<sup>a</sup> and Guodong Zou<sup>a</sup>

<sup>a</sup> College of Chemistry and Chemical Engineering, Xinyang Normal University, Xinyang 464000, China. E-mail: lintang@xynu.edu.cn

<sup>b</sup> Henan Province Key Laboratory of Utilization of Non-metallic Mineral in the South of Henan, Xinyang 464000, China.

### Table of Contents

|                                                                                                             |     |
|-------------------------------------------------------------------------------------------------------------|-----|
| 1. General remarks.....                                                                                     | S2  |
| 2. Synthesis of alkenes s-16, s-34 and s-35.....                                                            | S2  |
| 3. Typical reaction procedure of photoredox-catalyzed three-component alkene carbotrifluoromethylation..... | S6  |
| 4. “On/off” irradiation experiments for the reaction.....                                                   | S7  |
| 5. <sup>99</sup> Ru NMR experiments.....                                                                    | S8  |
| 6. Stern-Volmer fluorescence quenching experiments.....                                                     | S10 |
| 7. GC-MS detection for 37, 40, 41, 42.....                                                                  | S12 |
| 8. X-crystal preparation and structure determination.....                                                   | S16 |
| 9. Crystallographic data.....                                                                               | S16 |
| 10. Characterization data of products.....                                                                  | S18 |
| 11. NMR Spectra of products.....                                                                            | S32 |

## 1. General remarks

Proton nuclear magnetic resonance ( $^1\text{H}$  NMR) spectra, carbon nuclear magnetic resonance ( $^{13}\text{C}$  NMR) spectra and  $^{19}\text{F}$  fluorine spectra ( $^{19}\text{F}$  NMR) were recorded on a JEOL ECZ600R/S3 ( $^1\text{H}$  NMR 600 MHz,  $^{13}\text{C}$  NMR 150 MHz,  $^{19}\text{F}$  NMR 564 MHz). HRMS were recorded on a MicroMass Waters Xevo G2-XS QToF. GC and MS samples were recorded on an Agilent 7890A-5975C GC-MS system. Fluorescence quenching experiments were recorded on Edinburgh Instruments fluorescence spectrophotometer FLS1000. Unless otherwise indicated, all reagents were purchased commercially without further purification. For the light promoted alkene difunctionalization reaction: use of a blue LEDs panel (40 W, 450-470 nm, manufacturer: Hangzhou Jiadeng Precise Light Source LTD). The distance from the light source to the irradiation glass vial is about 2 cm.

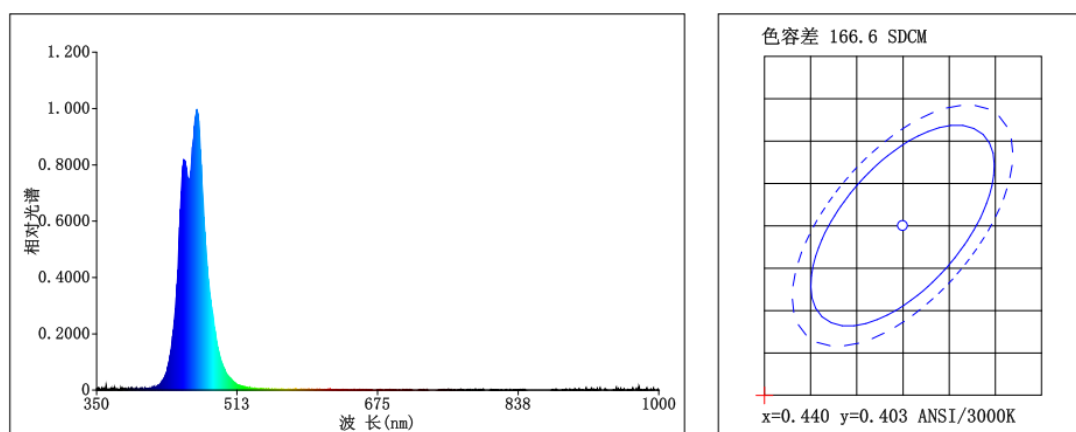

## 2. Synthesis of alkenes s-16, s-34 and s-35

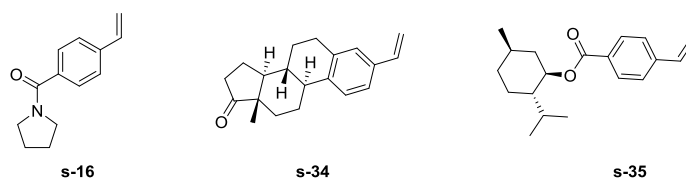

### (1) Synthesis of s-16

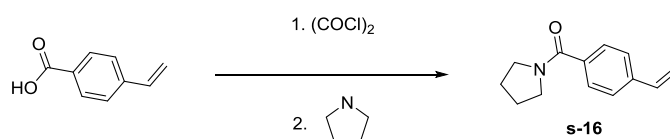

The compound **s-16** could be prepared according to the reaction procedure: 4-

vinylbenzoic acid (0.74 g, 5 mmol) and a few drops of dimethylformamide were added to CH<sub>2</sub>Cl<sub>2</sub> (20 mL), the reaction mixture was cooled in an ice bath, and oxalyl chloride (2.52 g, 20 mmol) was added dropwise. The solution was stirred at room temperature for 4 h. Then the solvent and oxalyl chloride were removed in vacuum to give 4-vinylbenzoyl chloride. Pyrrolidine (0.35 g, 5 mmol) and Et<sub>3</sub>N (2.02 g, 20 mmol) were added to CH<sub>2</sub>Cl<sub>2</sub> (20 mL). The reaction mixture was cooled in an ice bath, and the as-prepared 4-vinylbenzoyl chloride was added dropwise. The solution was stirred at room temperature for 6 h. The solvent was then evaporated under reduced pressure. The residue was further purified by flash column chromatography using petroleum ether/ethyl acetate as eluant to afford **s-16** as a white solid (0.94 g, 94%). <sup>1</sup>H NMR (600 MHz, CDCl<sub>3</sub>): δ [ppm] = 7.46-7.45 (d, *J* = 8.2 Hz, 2H), 7.40-7.38 (d, *J* = 8.2 Hz, 2H), 6.71-6.66 (dd, *J* = 17.6, 11.0 Hz, 1H), 5.78-5.74 (d, *J* = 17.6 Hz, 1H), 5.29-5.27 (d, *J* = 11.0 Hz, 1H), 3.61-3.59 (t, *J* = 6.9 Hz, 2H), 3.41-3.39 (t, *J* = 6.8 Hz, 2H), 1.94-1.90 (m, 2H), 1.84-1.81 (m, 2H) (this compound was known, see the ref. *J. Am. Chem. Soc.* **2021**, *143*, 10524).

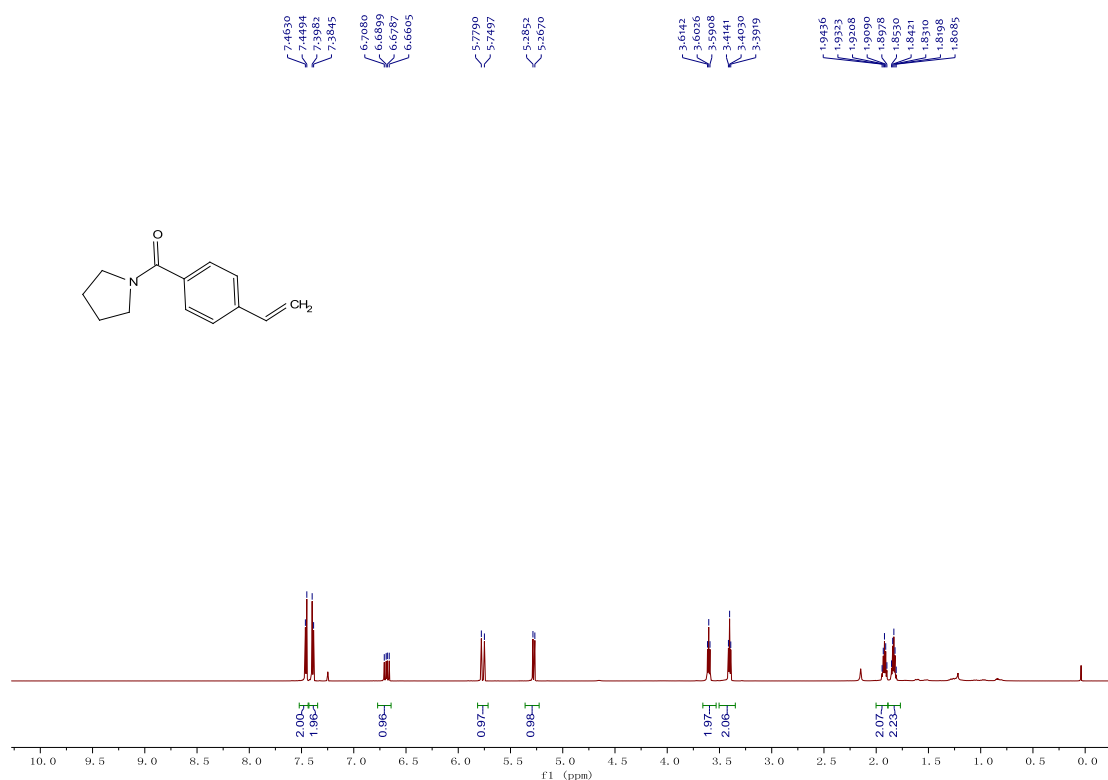

## (2) Synthesis of **s-34**

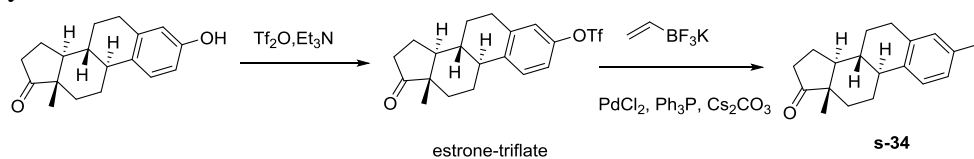

The compound estrone-triflate could be prepared according to the reaction procedure: estrone (0.54 g, 2 mmol) and Et<sub>3</sub>N (0.40 g, 4 mmol) were added to CH<sub>2</sub>Cl<sub>2</sub> (10 mL), the reaction mixture was cooled in an ice bath, and trifluoromethanesulfonic

anhydride (0.84 g, 3 mmol) was added dropwise. The solution was stirred at room temperature for 8 h. Then a saturated aqueous solution of NaHCO<sub>3</sub> was added to the reaction mixture, and the resulted mixture was extracted with ethyl acetate. Combined organic fractions were dried, followed by concentration under reduced pressure. The obtained residue was further purified by flash column chromatography using petroleum ether/ethyl acetate as eluant to afford estrone-triflate as a yellow solid (0.72 g, 90%). <sup>1</sup>H NMR (600 MHz, CDCl<sub>3</sub>): δ [ppm] = 7.34-7.32 (d, *J* = 8.7 Hz, 1H), 7.03-7.01 (dd, *J* = 8.7, 2.5 Hz, 1H), 6.98 (d, *J* = 2.5 Hz, 1H), 2.94-2.92 (m, 2H), 2.53-2.48 (dd, *J* = 19.1, 8.9 Hz, 1H), 2.41-2.37 (m, 1H), 2.31-2.26 (m, 1H), 2.18-2.11 (m, 1H), 2.08-2.01 (m, 2H), 1.98-1.95 (m, 1H), 1.66-1.42 (m, 6H), 0.91 (s, 3H) (this compound was known, see the ref. *J. Am. Chem. Soc.* **2021**, *143*, 10760).

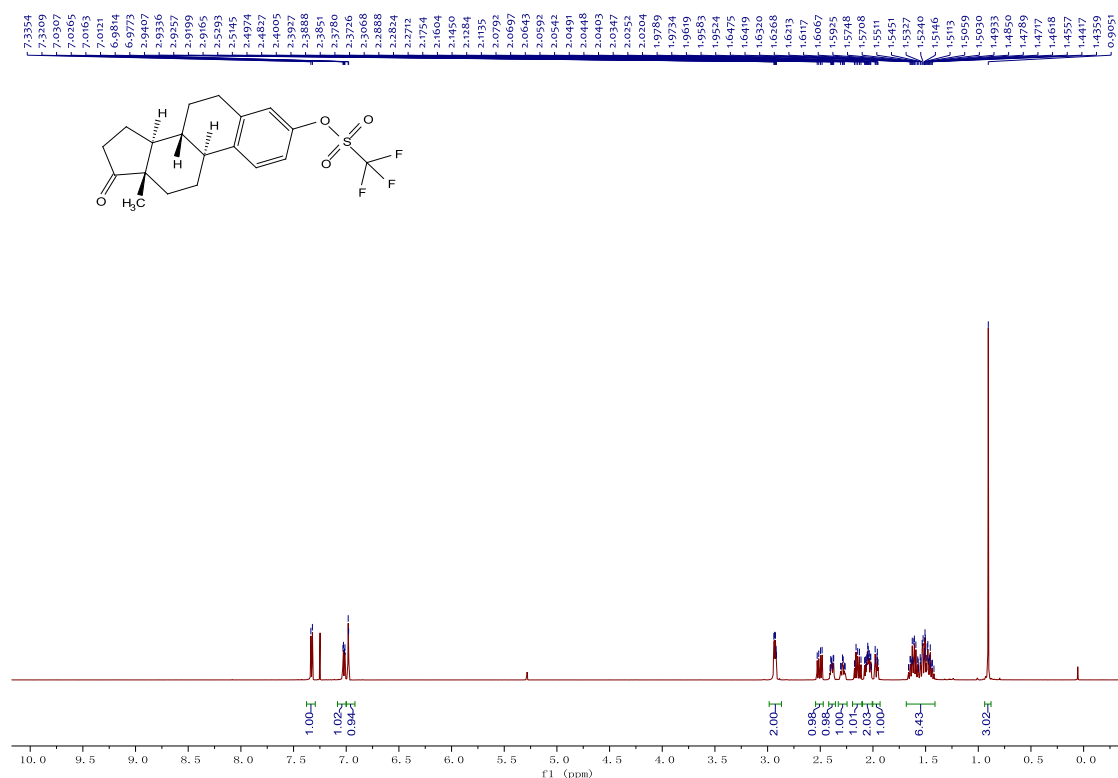

The compound **s-34** could be prepared according to the reaction procedure: To an oven-dried glass vial was added estrone-triflate (603 mg, 1.5 mmol), potassium vinyltrifluoroborate (402 mg, 3 mmol), PdCl<sub>2</sub> (26.6 mg, 0.15 mmol), PPh<sub>3</sub> (59 mg, 0.225 mmol) and Cs<sub>2</sub>CO<sub>3</sub> (1466 mg, 4.5 mmol). The tube was evacuated and back-filled with nitrogen, which was repeated three times. THF (3 mL) and H<sub>2</sub>O (0.5 mL) were subsequently added to the tube via syringe. The resulting mixture was stirred at 85 °C for 20 h. The mixture was extracted with ethyl acetate and concentrated under reduced pressure. The resulting residue was further purified by flash column chromatography using petroleum ether/ethyl acetate as eluant to afford **s-34** as a white solid (327.7 mg, 78%). <sup>1</sup>H NMR (600 MHz, CDCl<sub>3</sub>): δ [ppm] = 7.26-7.25 (d, *J* = 7.9 Hz, 1H), 7.22-7.20 (d, *J* = 8.0 Hz, 1H), 7.14 (s, 1H), 6.68-6.63 (dd, *J* = 17.6, 10.9 Hz, 1H), 5.72-5.69 (d, *J* = 17.6 Hz, 1H), 5.20-5.18 (d, *J* = 11.0 Hz, 1H), 2.92-2.90 (m, 2H),



2.52-2.48 (dd,  $J = 19.2, 8.9$  Hz, 1H), 2.44-2.40 (m, 1H), 2.31-2.27 (m, 1H), 2.17-2.11 (m, 1H), 2.08-2.00 (m, 2H), 1.97-1.94 (m, 1H), 1.66-1.40 (m, 6H), 0.90 (s, 3H) (this compound was known, see the ref. *J. Am. Chem. Soc.* **2021**, *143*, 10760).

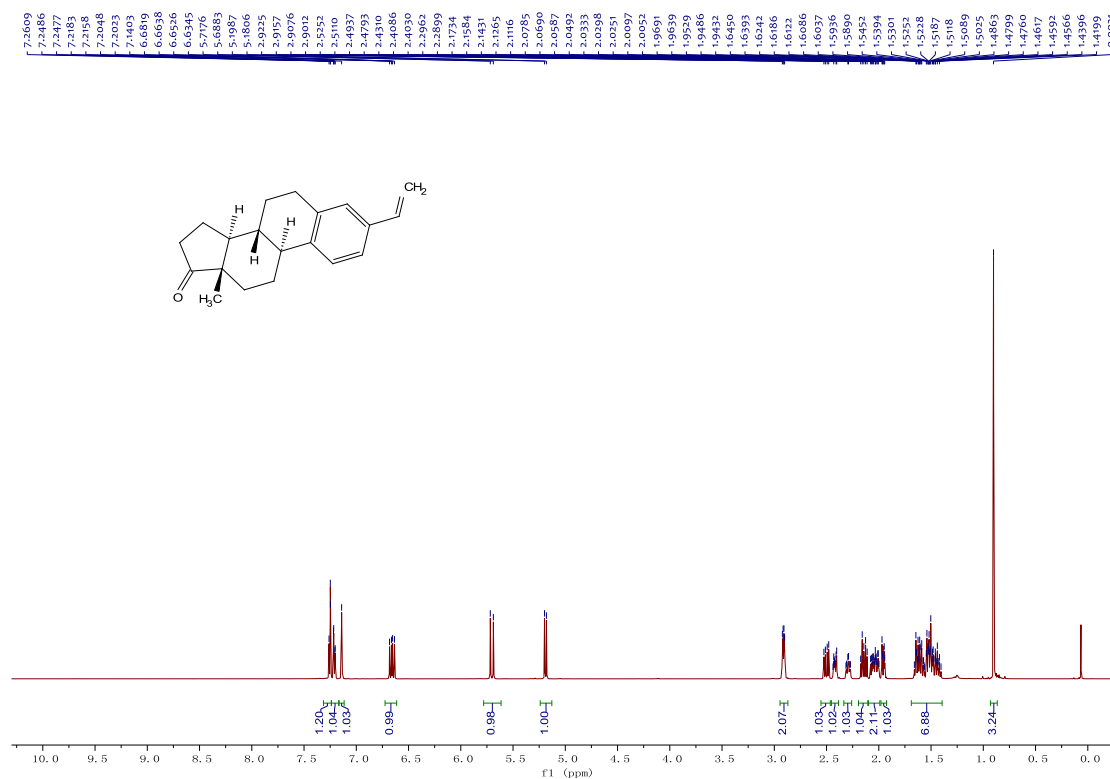

### (3) Synthesis of **s-35**

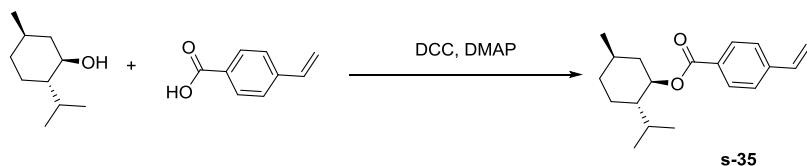

The compound **s-35** could be prepared according to the reaction procedure: 4-vinylbenzoic acid (0.74 g, 5 mmol), 1,3-dicyclohexyl-carbodiimide (1.24 g, 6 mmol) and DMAP (0.06 g, 0.5 mmol) were added to  $\text{CH}_2\text{Cl}_2$  (25 mL), and menthol (0.78 g, 5 mmol) was added dropwise. The solution was stirred at room temperature for 24 h. The solvent was then evaporated under reduced pressure. The resulted residue was further purified by flash column chromatography using petroleum ether/ethyl acetate as eluant to afford **s-35** as a colorless oil (1.06 g, 74%).  $^1\text{H}$  NMR (600 MHz,  $\text{CDCl}_3$ ):  $\delta$  [ppm] = 8.00-7.99 (d,  $J = 8.3$  Hz, 2H), 7.46-7.44 (d,  $J = 8.4$  Hz, 2H), 6.76-6.72 (dd,  $J = 17.6, 10.9$  Hz, 1H), 5.86-5.83 (d,  $J = 17.6$  Hz, 1H), 5.37-5.35 (d,  $J = 10.9$  Hz, 1H), 4.94-4.89 (td,  $J = 10.9, 4.4$  Hz, 1H), 2.13-2.10 (m, 1H), 1.97-1.92 (m, 1H), 1.73-1.70 (m, 2H), 1.56-1.52 (m, 2H), 1.14-1.06 (m, 2H), 0.92-0.89 (m, 7H), 0.79-0.77 (d,  $J = 6.9$  Hz, 3H) (this compound was known, see the ref. *J. Org. Chem.* **2023**, *88*, 16091).

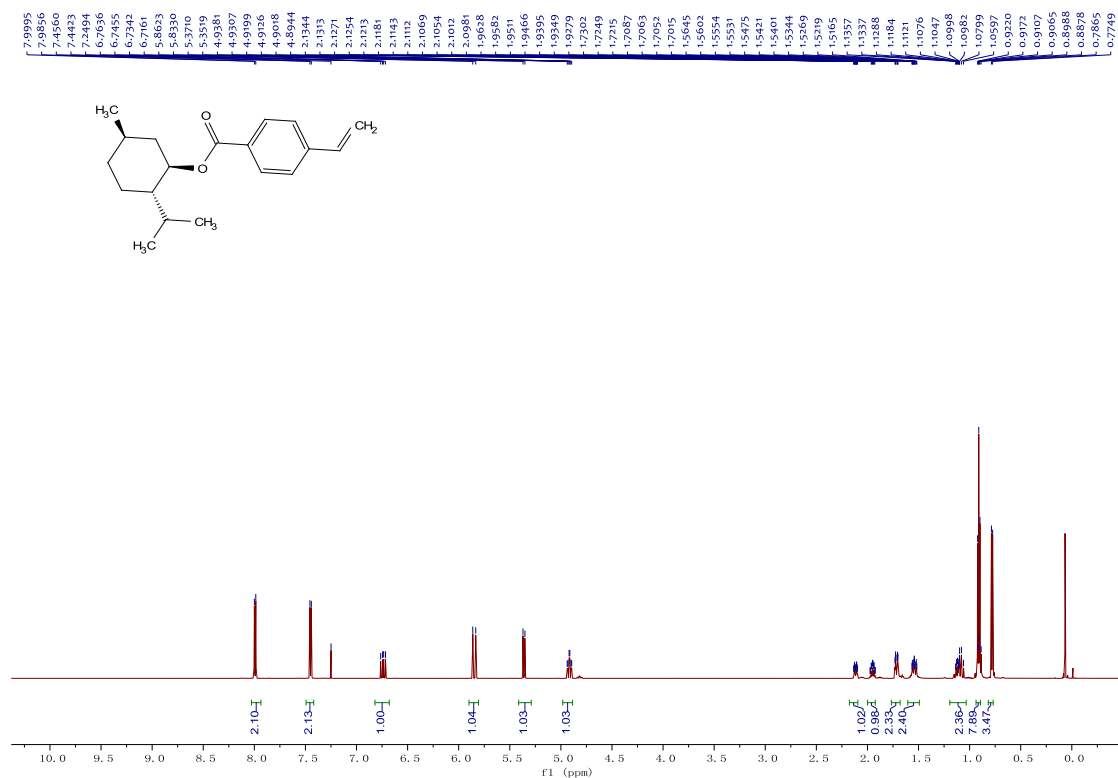

### 3. Typical reaction procedure of photoredox-catalyzed three-component alkene carbotrifluoromethylation

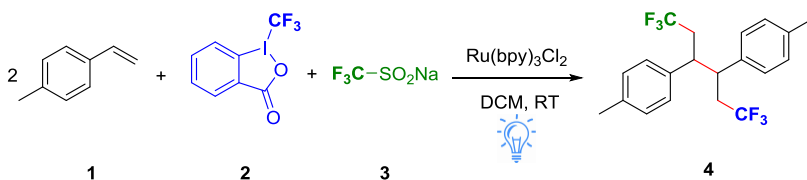

To an oven-dried 10 mL glass vial was added Togni reagent **2** (126 mg, 0.40 mmol), Langlois reagent **3** (62.4 mg, 0.40 mmol) and Ru(bpy)<sub>3</sub>Cl<sub>2</sub> (2.6 mg, 2 mol%). The tube was evacuated and back-filled with nitrogen, which was repeated three times. 4-Methylstyrene **1** (47.2 mg, 0.40 mmol) and DCM (1 mL) were then added to the tube via syringe. The resulting mixture was stirred at room temperature for 20 h with 40W blue LEDs (450-470 nm) irradiation. After the reaction completion, the mixture was concentrated under reduced pressure. The resulting residue was further purified by flash column chromatography using petroleum ether as eluant to afford the product **4**.

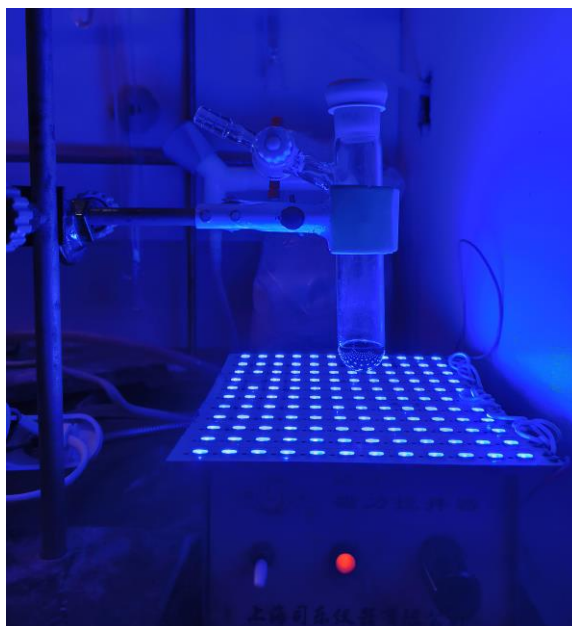

**Figure S1 Photograph of the reaction setup**

#### **4. “On/off” irradiation experiments for the reaction**

To an oven-dried 10 mL glass vial equipped a rubber stopper was added Togni reagent **2** (126 mg, 0.40 mmol), Langlois reagent **3** (62.4 mg, 0.40 mmol) and Ru(bpy)<sub>3</sub>Cl<sub>2</sub> (2.6 mg, 2 mol%). The tube was evacuated and back-filled with nitrogen, which was repeated three times. 4-Methylstyrene **1** (47.2 mg, 0.40 mmol) and DCM (1 mL) were then added to the tube via syringe. Once the mixture was stirred for 2 hours under 40 W blue LEDs radiation, 40 μL of the reaction mixture was taken out via syringe. The mixture was monitored by <sup>19</sup>F NMR using 1-bromo-4-fluorobenzene as an internal standard. The resulting mixture in the tube continued to react at dark for 2 h, and 40 μL of the reaction mixture was taken out via syringe. The mixture was monitored by <sup>19</sup>F NMR using 1-bromo-4-fluorobenzene as an internal standard. The above process was repeated for 3 times every 2 hours. The Figure S2 showed that the yield of **4** was obviously increased upon irradiating the reaction with blue LEDs. In contrast, the increase of the yield of **4** was not observed upon performing the reaction in the dark. These results represented the necessity of continuous visible light irradiation for the three-component alkene carbotrifluoromethylation.

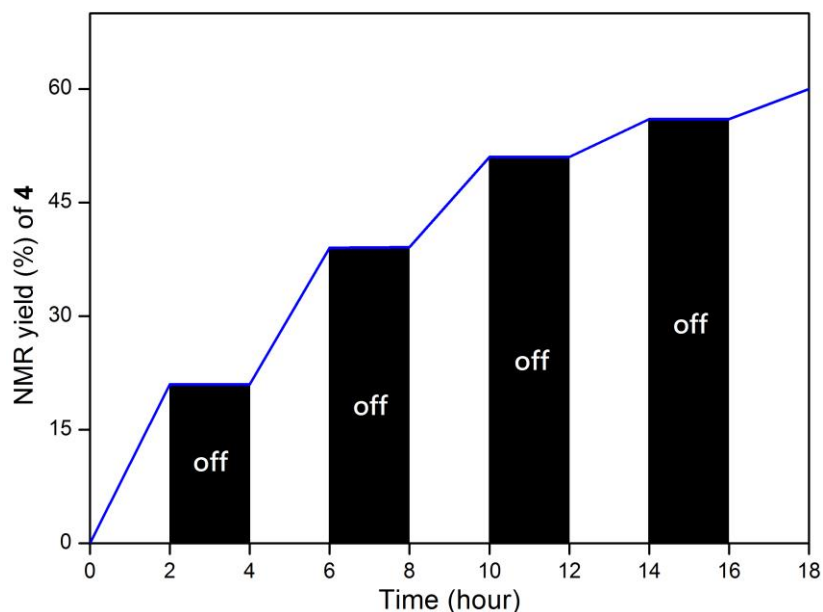

Figure S2. “On/off” irradiation experiments for the reaction.

## 5. <sup>99</sup>Ru NMR experiments

NMR measurements were performed on a 600 MHz NMR spectrometer (JEOL ECZ600R/S3) equipped with a 14.09 T superconducting magnet, an 8.0 mm double-resonance ROYAL probe and a set of low frequency unit (JEOL RESONANCE Inc., Japan). 500  $\mu$ L sample solutions (before and after reaction) were transferred into 8.0 mm ZrO<sub>2</sub> rotors and the <sup>99</sup>Ru NMR spectra were obtained by using Hahn\_echo pulse sequence with the following parameters: x\_Freq=27.69 MHz, x\_sweep=2000 ppm, x\_offset=2600 ppm, obs\_width\_first=1  $\mu$ s, obs\_width\_second=2  $\mu$ s, pre\_echo=2  $\mu$ s, relaxation\_delay=5 ms, and scans=108000. Unless otherwise stated, all the NMR experiments were conducted at room temperature (ca. 293K). Spectra of <sup>99</sup>Ru NMR represented that lower signal for the photocatalyst Ru(bpy)<sub>3</sub>Cl<sub>2</sub> was observed after the reaction, which indicated that symmetry of electron cloud of a quadrupolar Ru nucleus was decreased. That was to say, the valence of Ru was changed.

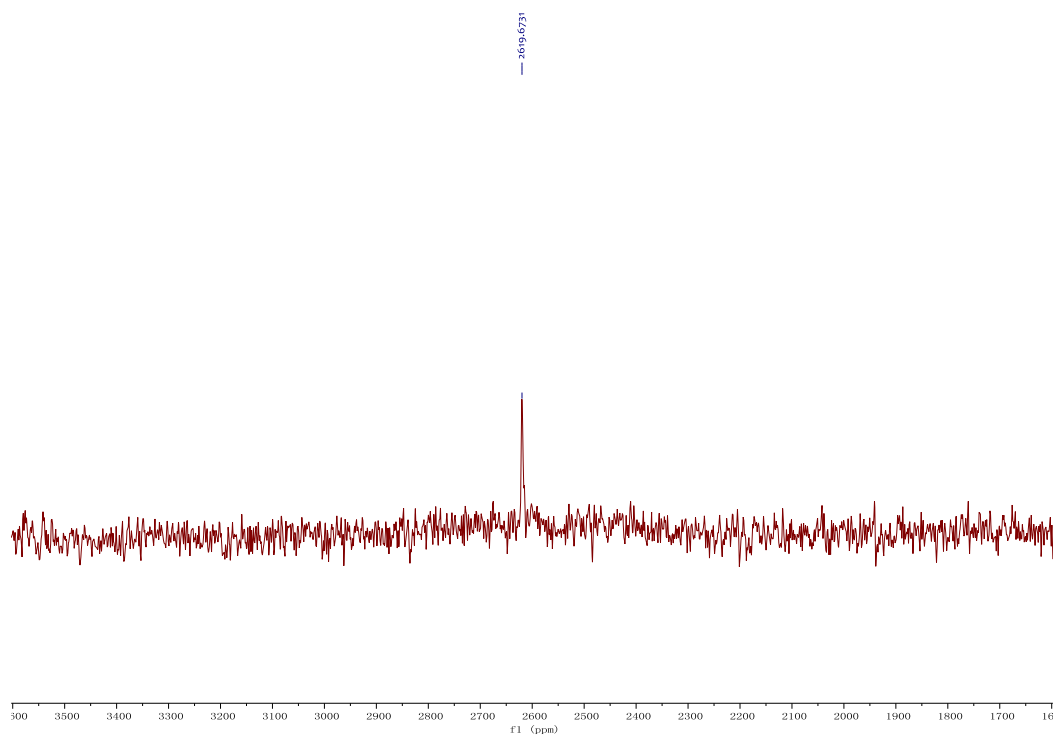

before reaction

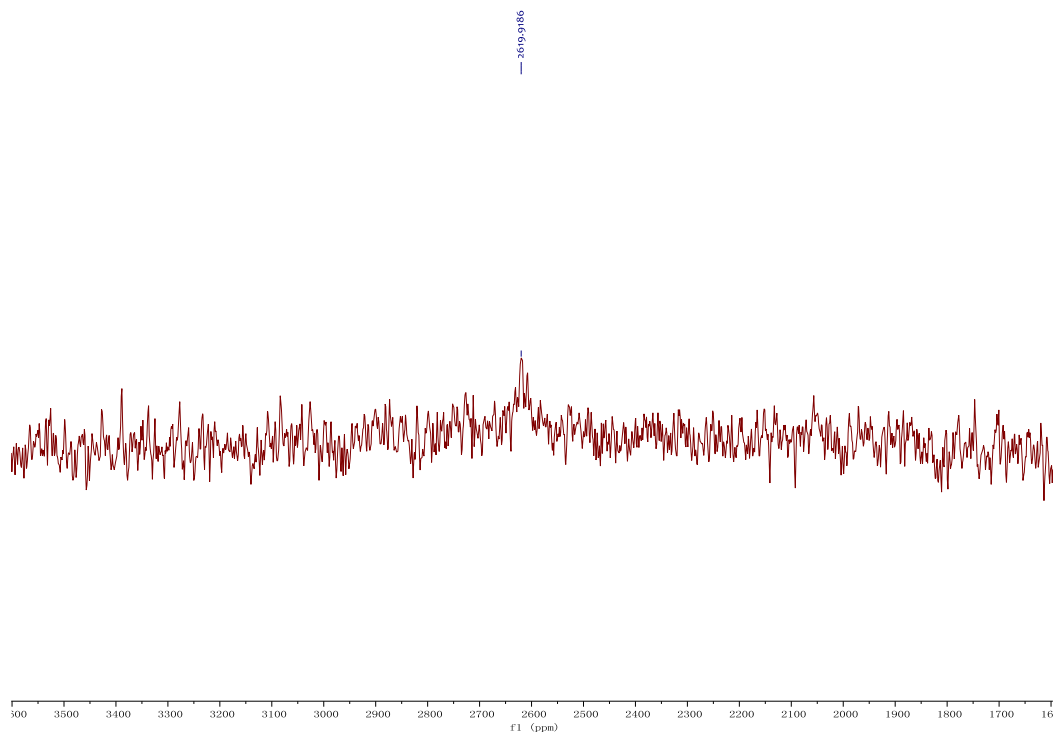

after reaction

## 6. Stern-Volmer fluorescence quenching experiments

Fluorescence measurements for freshly prepared  $\text{Ru}(\text{bpy})_3\text{Cl}_2$  stock solutions in DMF were performed with an excitation irradiation of  $\lambda_{\text{ex}} = 451$  nm and observed for a fluorescence emission of around  $\lambda_{\text{em}} = 640$  nm and an excitation as well as measuring bandwidth of 2 nm. The following fluorescence data were received with measurements of  $\text{Ru}(\text{bpy})_3\text{Cl}_2$  stock solutions of  $c = 4 \times 10^{-4}$  M containing Togni reagent in a range of  $c = 1 \times 10^{-4}$  M,  $2 \times 10^{-4}$  M,  $4 \times 10^{-4}$  M,  $6 \times 10^{-4}$  M.

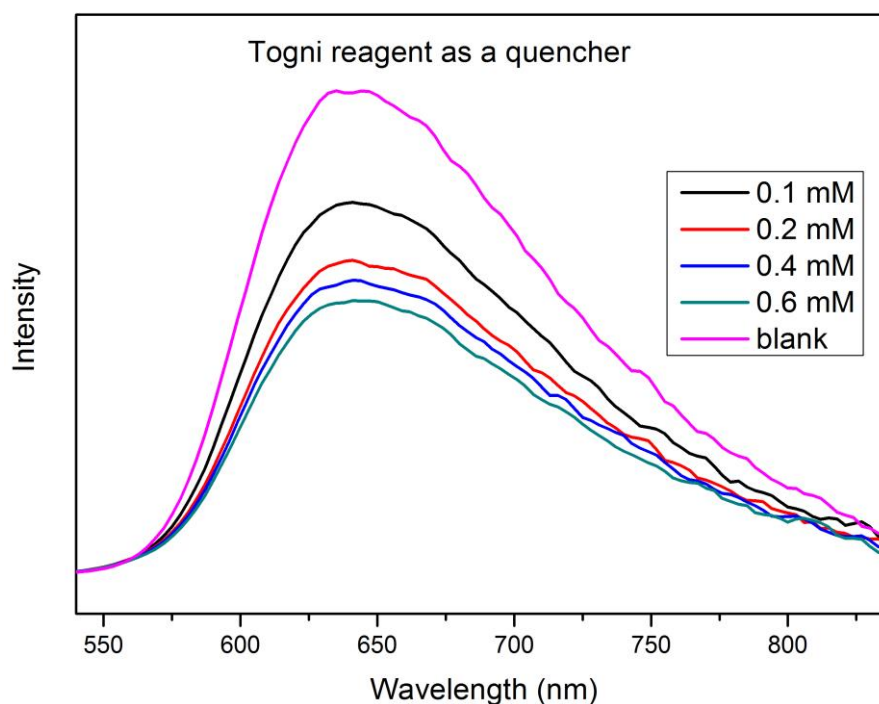

Figure S3. Emission spectra of  $\text{Ru}(\text{bpy})_3\text{Cl}_2$  containing Togni reagent

Fluorescence measurements for freshly prepared  $\text{Ru}(\text{bpy})_3\text{Cl}_2$  stock solutions in DMF were performed with an excitation irradiation of  $\lambda_{\text{ex}} = 451$  nm and observed for a fluorescence emission of around  $\lambda_{\text{em}} = 640$  nm and an excitation as well as measuring bandwidth of 2 nm. The following fluorescence data were received with measurements of  $\text{Ru}(\text{bpy})_3\text{Cl}_2$  stock solutions of  $c = 4 \times 10^{-4}$  M containing Langlois reagent in a range of  $c = 1 \times 10^{-4}$  M,  $2 \times 10^{-4}$  M,  $4 \times 10^{-4}$  M,  $6 \times 10^{-4}$  M.

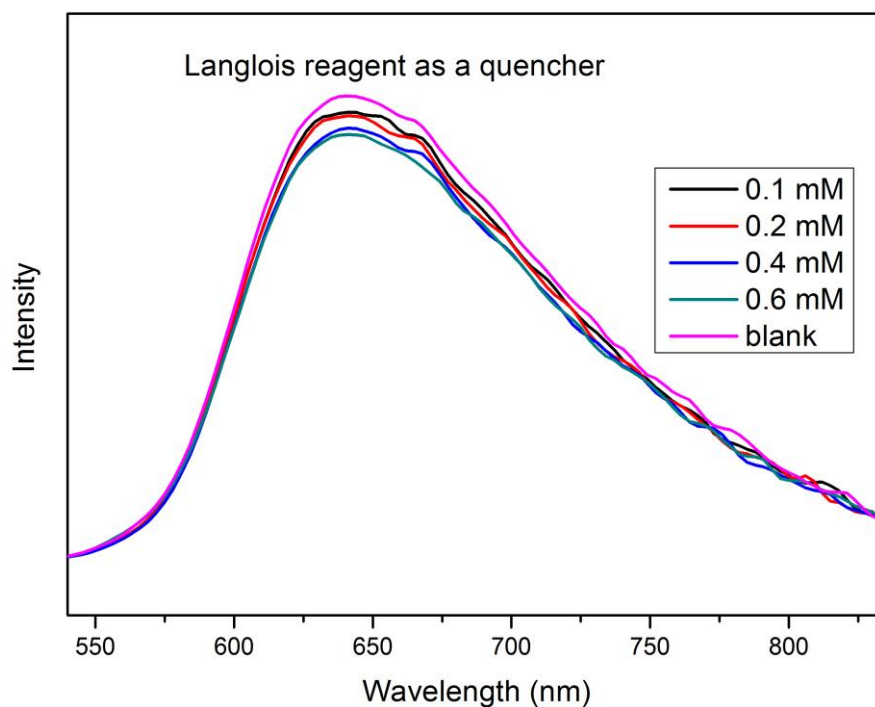

Figure S4. Emission spectra of Ru(bpy)<sub>3</sub>Cl<sub>2</sub> containing Langlois reagent

Stern-Volmer quenching plot for Ru(bpy)<sub>3</sub>Cl<sub>2</sub> using Togni and Langlois reagents as quenchers were obtained, respectively. The plot show significant quenching of the excited state of the photocatalyst Ru(bpy)<sub>3</sub>Cl<sub>2</sub> when using Togni reagent (**2**) as a quencher. These results indicate that photoredox-catalyzed three-component alkene carbotrifluoromethylation proceed through oxidative quenching cycle.

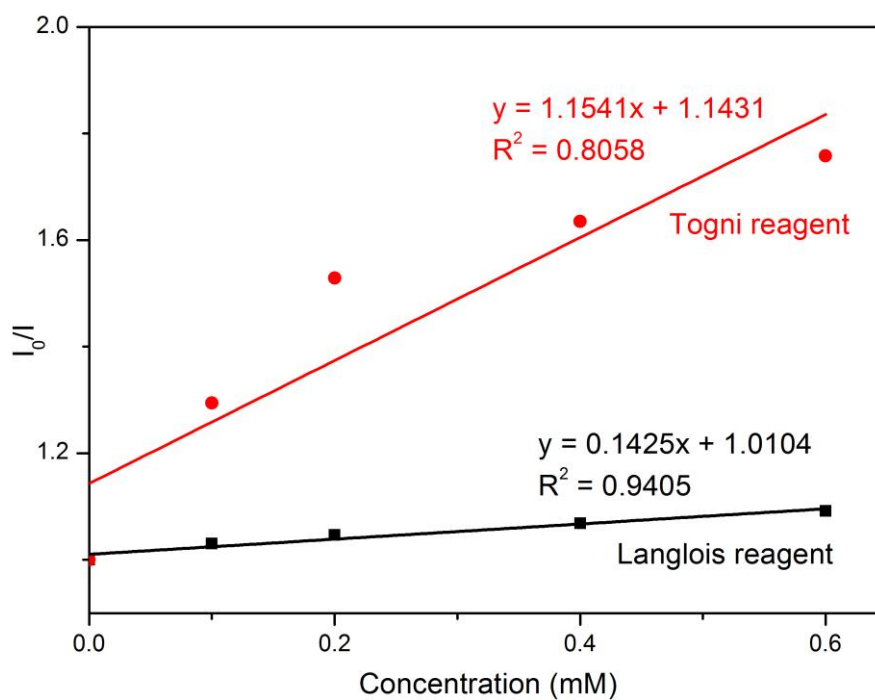

Figure S5. Stern-Volmer quenching plot for Ru(bpy)<sub>3</sub>Cl<sub>2</sub> using Togni and Langlois reagents as quenchers

## 7. GC-MS detection for 37, 40, 41, 42

丰度

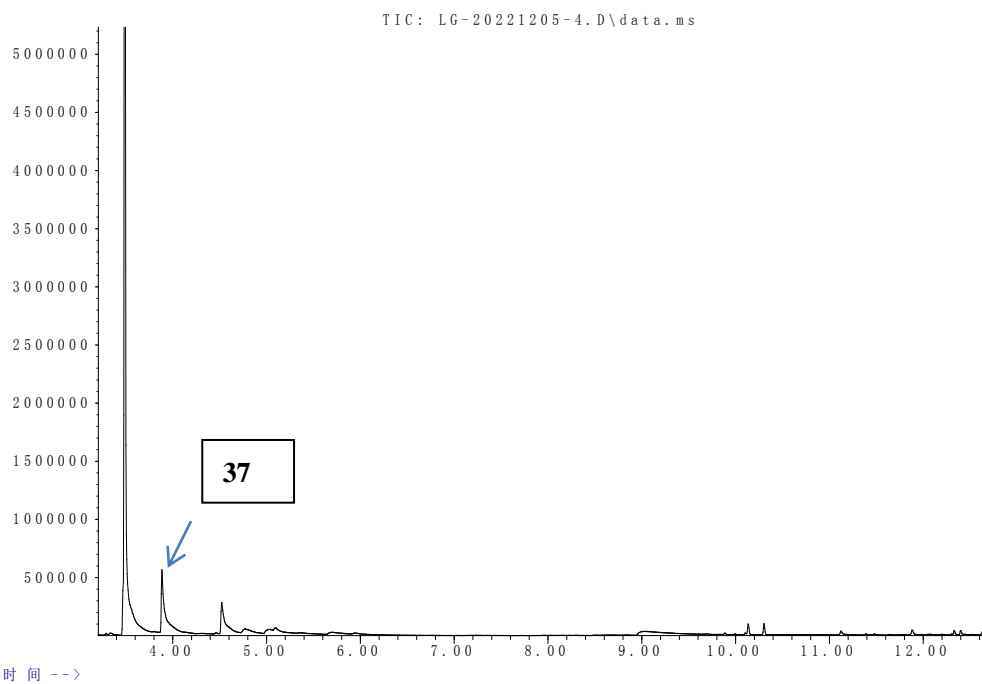

丰度

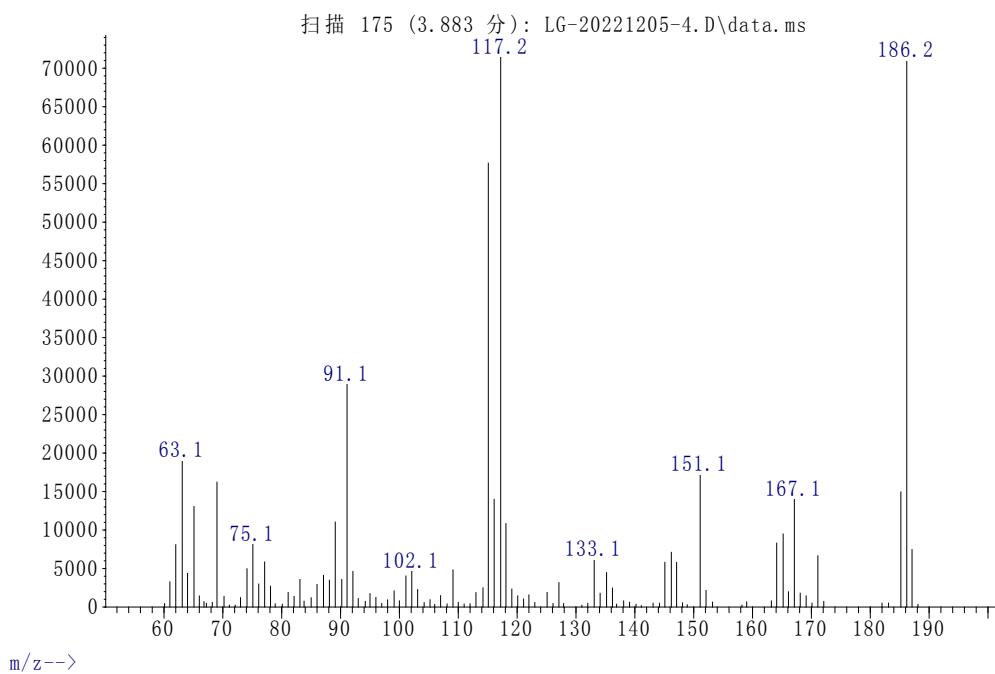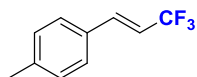

37, MS (ESI) m/z : 186



丰度

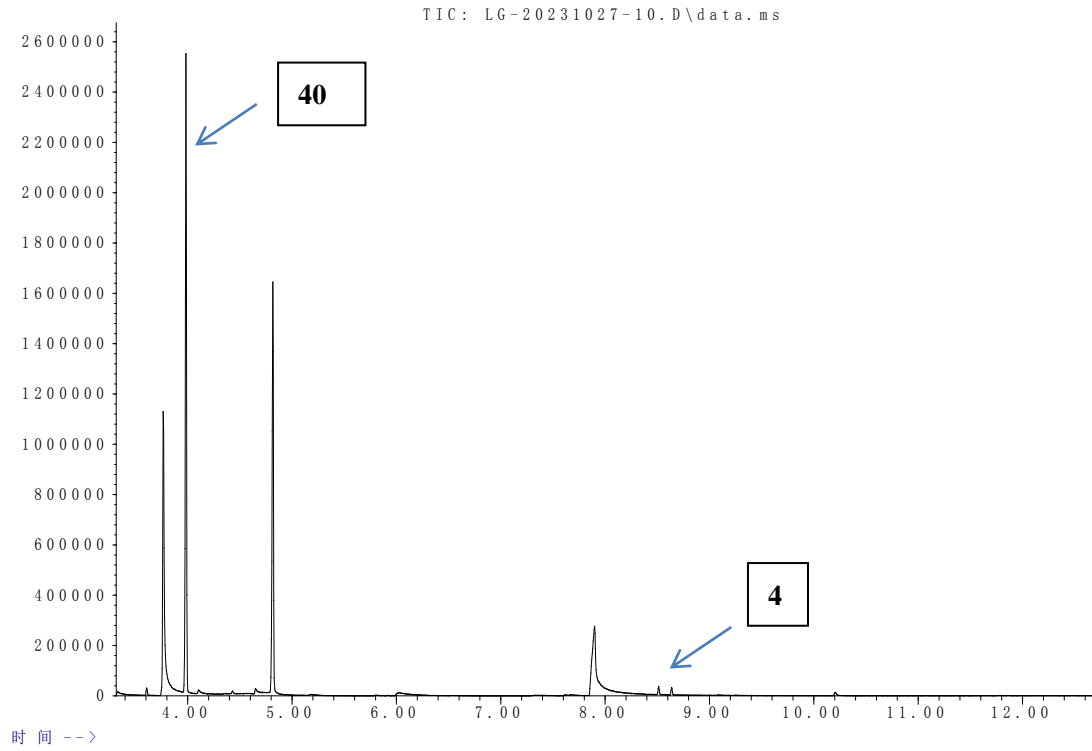

丰度

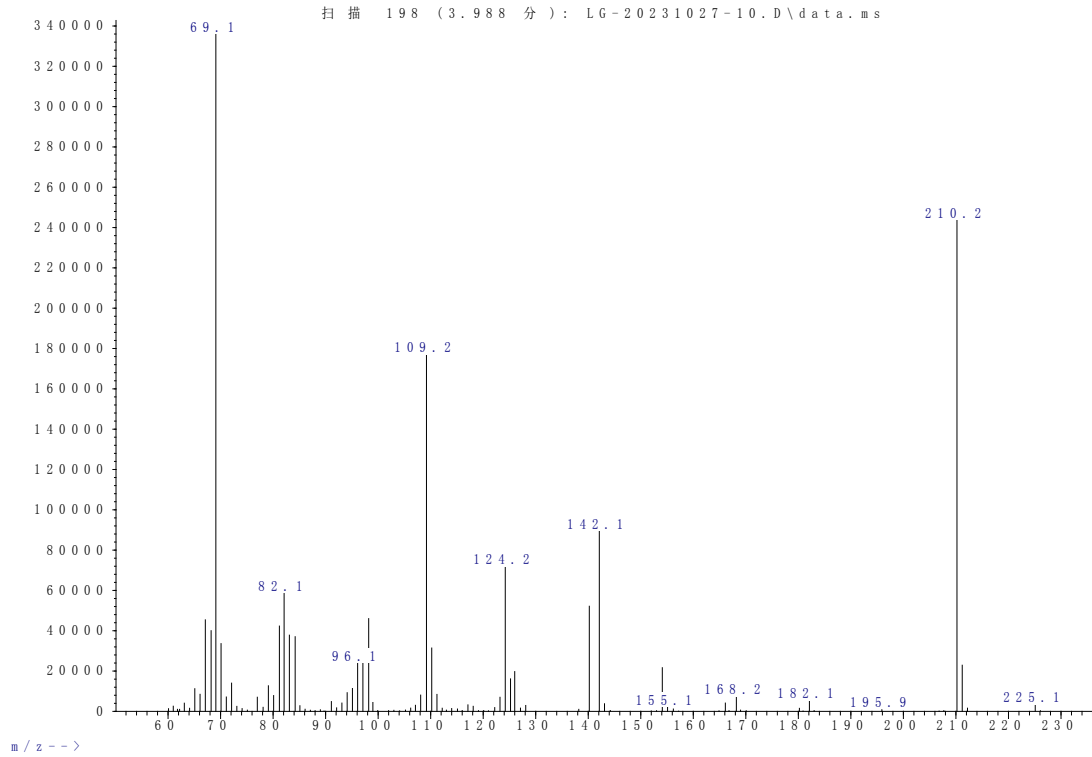

TEMPO-CF<sub>3</sub> (40); MS (ESI) m/z : 225

丰度

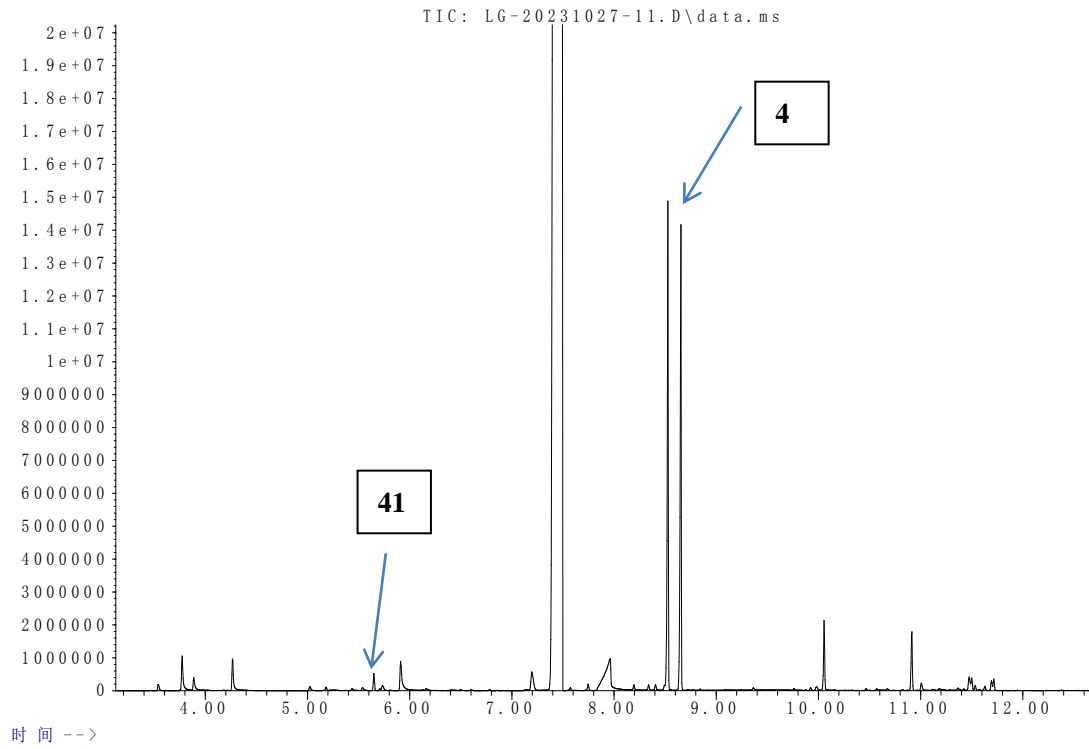

丰度

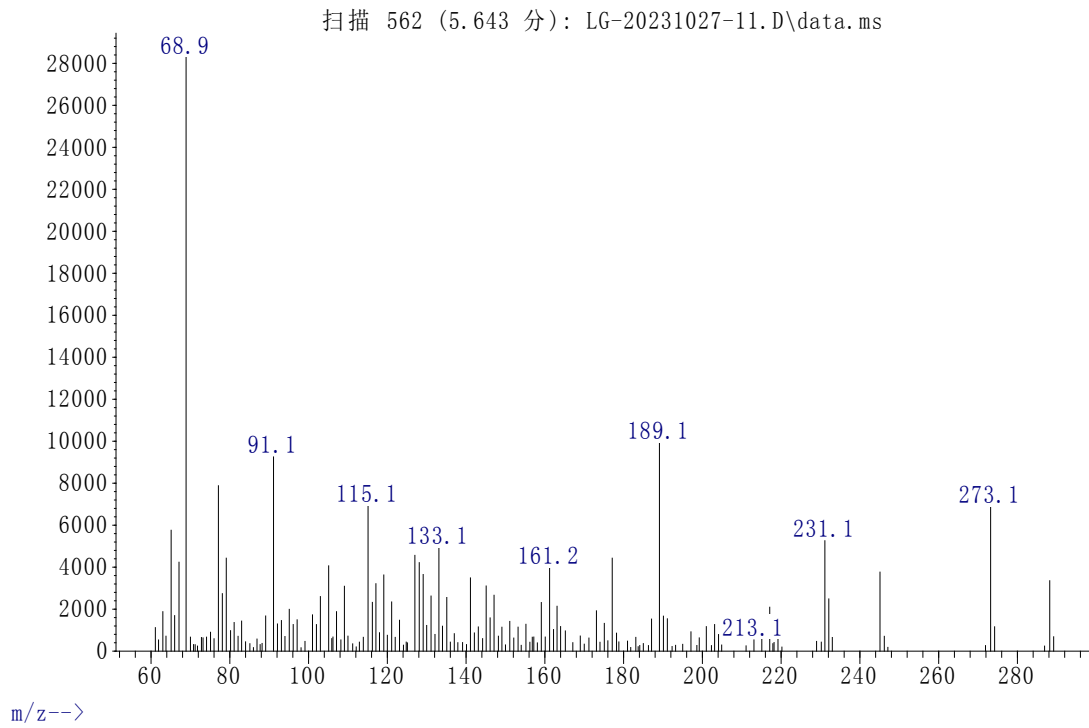

BHT-CF<sub>3</sub> (41) MS (ESI) m/z : 288

丰度

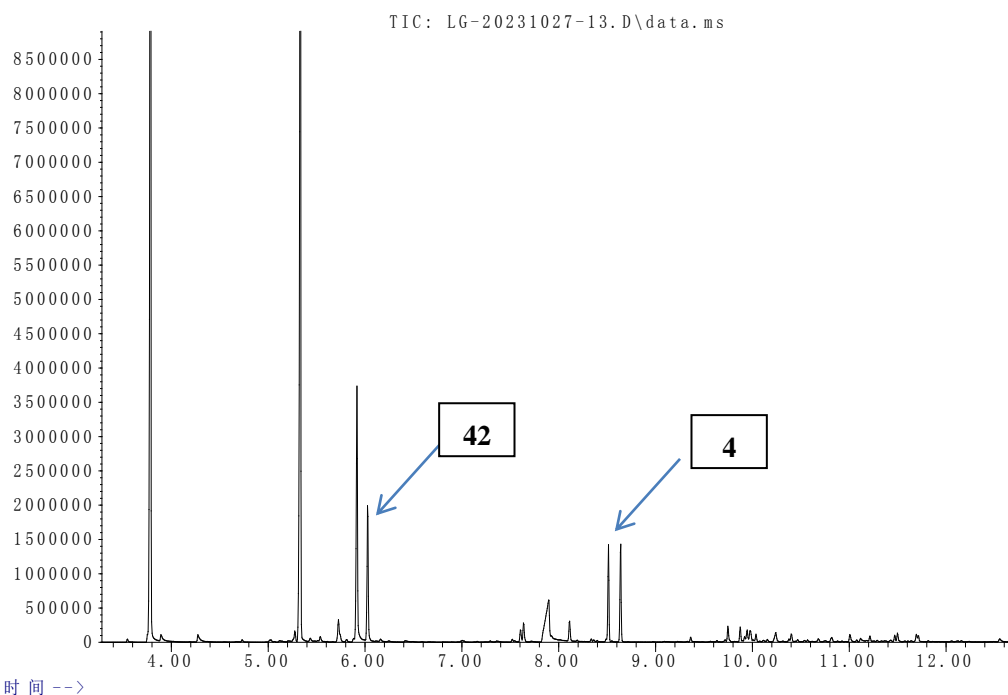

丰度

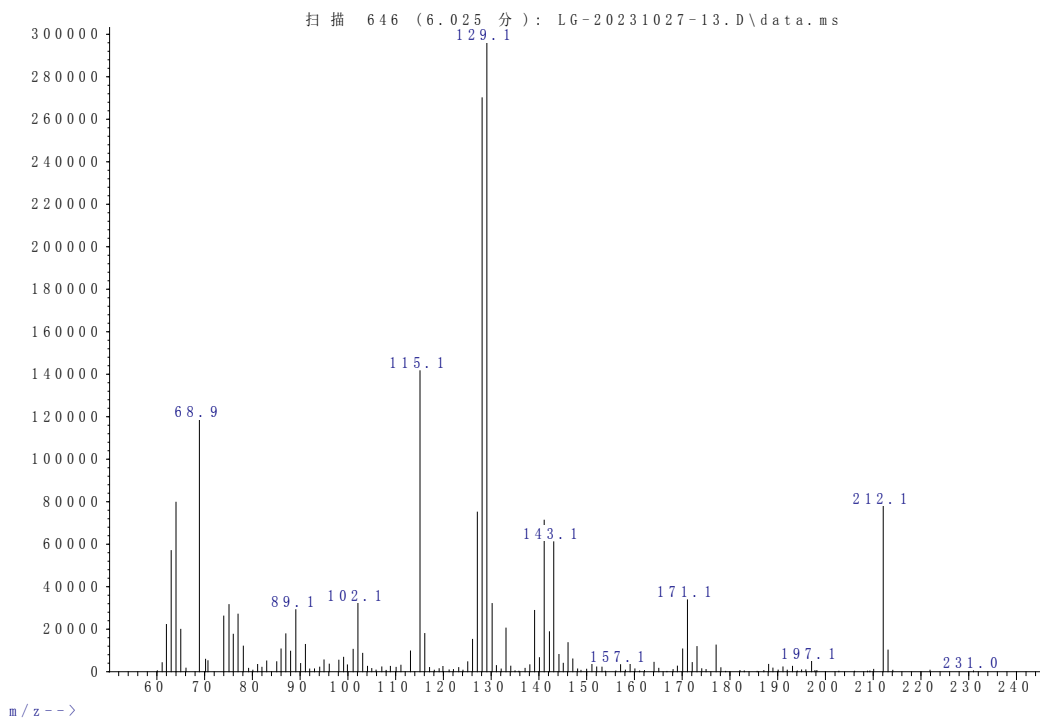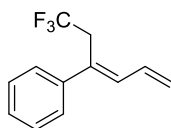

42, MS (ESI) m/z : 212

## 8. X-crystal preparation and structure determination

**Sample preparation:** The obtained **4** (anti) was dissolved with dichloromethane in a test tube. Suitable specimen of **4** was obtained by slow evaporation of the sample from dichloromethane.

**Structure determination:** The X-ray diffraction data for **4** were collected on a Bruker D8 QUEST ECO diffractometer with graphite-monochromated MoK $\alpha$  radiation ( $\lambda = 0.71073 \text{ \AA}$ ) at room temperature. The structure was solved by direct methods and refined by full-matrix least-squares on  $F^2$  by using the program SHELX-2016.<sup>[1]</sup> Anisotropic thermal factors were assigned to all the non-hydrogen atoms. Generally, the H atoms bonded to C and N atoms were placed geometrically and refined as riding. Further crystallographic details for both compounds are summarized in the following crystallographic data.

### Reference:

[1] Sheldrick, G. M. *Acta Crystallogr., Sect. C.*, 2015, **71**, 3-8.

## 9. Crystallographic data

**Table S1. Crystal data and structure refinement for 4**

|                             |                                                                                                                             |
|-----------------------------|-----------------------------------------------------------------------------------------------------------------------------|
| Empirical formula           | C <sub>20</sub> H <sub>20</sub> F <sub>6</sub>                                                                              |
| Formula weight              | 374.37                                                                                                                      |
| Temperature                 | 295(2) K                                                                                                                    |
| Wavelength                  | 0.71073 Å                                                                                                                   |
| Crystal system, space group | Triclinic, $P2_1/c$                                                                                                         |
| Unit cell dimensions        | $a = 10.0720(9) \text{ \AA}$<br>$b = 10.9544(9) \text{ \AA}$ $\beta = 93.453(3) \text{ deg}$<br>$c = 8.2997(8) \text{ \AA}$ |

|                                                     |                                                                 |
|-----------------------------------------------------|-----------------------------------------------------------------|
| Volume                                              | 914.07(14) Å <sup>3</sup>                                       |
| Z, Calculated density                               | 2, 1.360 g cm <sup>-3</sup>                                     |
| Absorption coefficient                              | 0.121 mm <sup>-1</sup>                                          |
| <i>F</i> (000)                                      | 388                                                             |
| Reflections collected / unique                      | 13384 / 1800 [ <i>R</i> (int) = 0.0524]                         |
| Completeness to theta = 25.242                      | 99.8 %                                                          |
| Refinement method                                   | Full-matrix least-squares on <i>F</i> <sup>2</sup>              |
| parameters                                          | 119                                                             |
| Goodness-of-fit on <i>F</i> <sup>2</sup>            | 1.027                                                           |
| Final <i>R</i> indices [ <i>I</i> > 2σ( <i>I</i> )] | <i>R</i> <sub>1</sub> = 0.0517, <i>wR</i> <sub>2</sub> = 0.1242 |
| <i>R</i> indices (all data)                         | <i>R</i> <sub>1</sub> = 0.0766, <i>wR</i> <sub>2</sub> = 0.1426 |

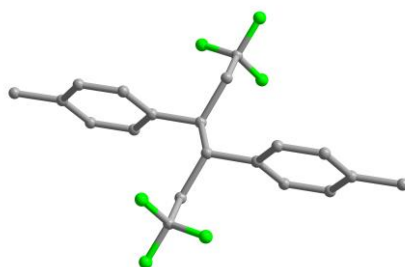

CCDC: no. 2347065

## 10. Characterization data of products

### 4,4'-(1,1,1,6,6,6-hexafluorohexane-3,4-diyl)bis(methylbenzene) (4)

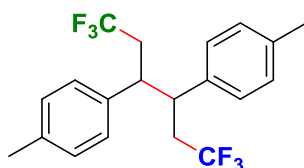

This compound was prepared according to typical reaction procedure of photoredox-catalyzed three-component alkene carbotrifluoromethylation and purified by column chromatography (petroleum ether as eluant) to offer the product. Colorless oil; 34.1 mg, 42%; syn (the diastereoisomers could be isolated);  $^1\text{H}$  NMR (600 MHz,  $\text{CDCl}_3$ ):  $\delta$  [ppm] = 7.03-7.02 (d,  $J$  = 7.8 Hz, 4H), 6.70-6.68 (d,  $J$  = 7.8 Hz, 4H), 3.33-3.29 (m, 2H), 2.55-2.46 (m, 2H), 2.35-2.26 (m, 2H), 2.31 (s, 6H);  $^{13}\text{C}$  NMR (150 MHz,  $\text{CDCl}_3$ ):  $\delta$  [ppm] = 137.1, 134.8, 129.4, 128.7, 126.7 (q,  $J_{\text{CF}}$  = 278.5 Hz), 43.1, 37.5 (q,  $J_{\text{CF}}$  = 27.2 Hz), 21.2;  $^{19}\text{F}$  NMR (564 MHz,  $\text{CDCl}_3$ ):  $\delta$  [ppm] = -63.2 (t,  $J$  = 10.6 Hz, 6F).

White solid; 24.7 mg, 33%; anti (the diastereoisomers could be isolated);  $^1\text{H}$  NMR (600 MHz,  $\text{CDCl}_3$ ):  $\delta$  [ppm] = 7.18-7.17 (d,  $J$  = 7.7 Hz, 4H), 7.12-7.10 (d,  $J$  = 7.8 Hz, 4H), 3.01-2.96 (m, 2H), 2.35 (s, 6H), 2.25-2.16 (m, 2H), 2.13-2.05 (m, 2H);  $^{13}\text{C}$  NMR (150 MHz,  $\text{CDCl}_3$ ):  $\delta$  [ppm] = 137.6, 137.3, 129.9, 127.8, 126.5 (q,  $J_{\text{CF}}$  = 277.6 Hz), 45.5, 38.3 (q,  $J_{\text{CF}}$  = 27.6 Hz), 21.2;  $^{19}\text{F}$  NMR (564 MHz,  $\text{CDCl}_3$ ):  $\delta$  [ppm] = -63.3 (t,  $J$  = 10.8 Hz, 6F).<sup>[1]</sup>

### 4,4'-(1,1,1,6,6,6-hexafluorohexane-3,4-diyl)bis(methoxybenzene) (5)

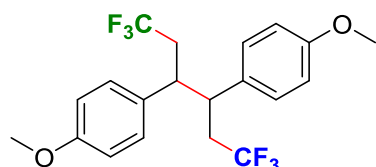

This compound was prepared according to typical reaction procedure of photoredox-catalyzed three-component alkene carbotrifluoromethylation and purified by column chromatography (petroleum ether as eluant) to offer the product. White solid; 50.3 mg, 62%; anti : syn = 1.09 : 1 (the diastereoisomers could not be isolated);  $^1\text{H}$  NMR (600 MHz,  $\text{CDCl}_3$ ):  $\delta$  [ppm] = 7.14-7.13 (d,  $J$  = 8.6 Hz, 4H), 6.91-6.90 (d,  $J$  = 8.7 Hz, 4H), 6.77-6.75 (d,  $J$  = 8.8 Hz, 3.7H), 6.71-6.70 (d,  $J$  = 8.7 Hz, 3.7H), 3.82 (s, 6H), 3.78 (s, 5.5H), 3.31-3.28 (m, 1.8H), 2.99-2.94 (m, 2H), 2.53-2.45 (m, 1.8H), 2.32-2.26 (m, 1.8H), 2.20-2.06 (m, 4H);  $^{13}\text{C}$  NMR (150 MHz,  $\text{CDCl}_3$ ):  $\delta$  [ppm] = 158.9, 158.8, 132.5, 130.5, 129.8, 128.9, 126.7 (q,  $J_{\text{CF}}$  = 276.4 Hz), 126.5 (q,  $J_{\text{CF}}$  = 277.6 Hz), 114.5, 113.3, 55.32, 55.27, 45.3, 42.8, 38.3 (q,  $J_{\text{CF}}$  = 27.6 Hz), 37.8 (q,  $J_{\text{CF}}$  = 27.4 Hz);  $^{19}\text{F}$  NMR (564 MHz,  $\text{CDCl}_3$ ):  $\delta$  [ppm] = -63.1 (t,  $J$  = 10.6 Hz, 5.5F), -63.3 (t,  $J$  = 10.6 Hz, 6F).<sup>[1]</sup>

(1,1,1,6,6,6-hexafluorohexane-3,4-diyl)bis(4,1-phenylene) diacetate (**6**)

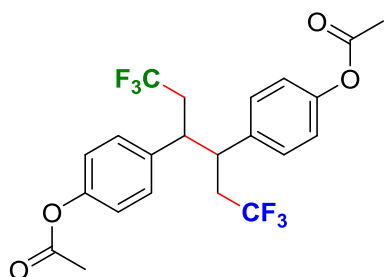

This compound was prepared according to typical reaction procedure of photoredox-catalyzed three-component alkene carbotrifluoromethylation and purified by column chromatography (petroleum ether/ethyl acetate (30:1) as eluant) to offer the product. White solid; 65.6 mg, 71%; anti : syn = 1 : 1 (the diastereoisomers could not be isolated);  $^1\text{H}$  NMR (600 MHz,  $\text{CDCl}_3$ ):  $\delta$  [ppm] = 7.23-7.21 (d,  $J$  = 8.4 Hz, 4H), 7.14-7.13 (d,  $J$  = 8.3 Hz, 4H), 6.97-6.95 (d,  $J$  = 8.4 Hz, 4H), 6.78-6.77 (d,  $J$  = 8.4 Hz, 4H), 3.40-3.37 (m, 2H), 3.10-3.06 (m, 2H), 2.58-2.50 (m, 2H), 2.38-2.30 (m, 2H), 2.30 (s, 6H), 2.27 (s, 6H), 2.24-2.10 (m, 4H);  $^{13}\text{C}$  NMR (150 MHz,  $\text{CDCl}_3$ ):  $\delta$  [ppm] = 169.3, 169.2, 150.2, 150.0, 137.6, 135.2, 130.3, 128.9, 126.5 (q,  $J_{\text{CF}}$  = 273.5 Hz), 126.2 (q,  $J_{\text{CF}}$  = 274.7 Hz), 122.3, 121.2, 45.2, 42.8, 38.3 (q,  $J_{\text{CF}}$  = 27.6 Hz), 37.6 (q,  $J_{\text{CF}}$  = 27.4 Hz), 21.3, 21.2;  $^{19}\text{F}$  NMR (564 MHz,  $\text{CDCl}_3$ ):  $\delta$  [ppm] = -63.1 (t,  $J$  = 10.4 Hz, 6F), -63.3 (t,  $J$  = 10.6 Hz, 6F).<sup>[1]</sup>

4,4'-(1,1,1,6,6,6-hexafluorohexane-3,4-diyl)bis(tert-butylbenzene) (**7**)

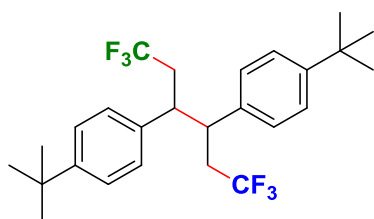

This compound was prepared according to typical reaction procedure of photoredox-catalyzed three-component alkene carbotrifluoromethylation and purified by column chromatography (petroleum ether as eluant) to offer the product. Colorless oil; 34.8 mg, 38%; syn (the diastereoisomers could be isolated);  $^1\text{H}$  NMR (600 MHz,  $\text{CDCl}_3$ ):  $\delta$  [ppm] = 7.22-7.20 (d,  $J$  = 8.3 Hz, 4H), 6.72-6.71 (d,  $J$  = 8.3 Hz, 4H), 3.34-3.31 (m, 2H), 2.57-2.48 (m, 2H), 2.37-2.28 (m, 2H), 1.29 (s, 18H);  $^{13}\text{C}$  NMR (150 MHz,  $\text{CDCl}_3$ ):  $\delta$  [ppm] = 150.3, 135.0, 129.1, 126.8 (q,  $J_{\text{CF}}$  = 276.8 Hz), 124.7, 43.0, 37.4 (q,  $J_{\text{CF}}$  = 27.4 Hz), 34.5, 31.4;  $^{19}\text{F}$  NMR (564 MHz,  $\text{CDCl}_3$ ):  $\delta$  [ppm] = -63.2 (t,  $J$  = 10.6 Hz, 6F).

White solid; 36.6 mg, 40%; anti (the diastereoisomers could be isolated);  $^1\text{H}$  NMR (600 MHz,  $\text{CDCl}_3$ ):  $\delta$  [ppm] = 7.37-7.36 (d,  $J$  = 8.2 Hz, 4H), 7.15-7.13 (d,  $J$  = 8.2 Hz, 4H), 3.02-3.00 (m, 2H), 2.21-2.06 (m, 4H), 1.32 (s, 18H);  $^{13}\text{C}$  NMR (150 MHz,  $\text{CDCl}_3$ ):  $\delta$  [ppm] = 150.5, 137.5, 127.5, 126.5 (q,  $J_{\text{CF}}$  = 275.5 Hz), 126.0, 45.4, 38.3 (q,  $J_{\text{CF}}$  = 27.6 Hz), 34.6, 31.4;  $^{19}\text{F}$  NMR (564 MHz,  $\text{CDCl}_3$ ):  $\delta$  [ppm] = -63.3 (t,  $J$  = 10.6 Hz, 6F); HRMS (ESI)  $m/z$ :  $[\text{M}+\text{H}]^+$  calcd. for  $\text{C}_{26}\text{H}_{33}\text{F}_6$  459.2486; found 459.2482.

(1,1,1,6,6,6-hexafluorohexane-3,4-diyl)dibenzene (**8**)

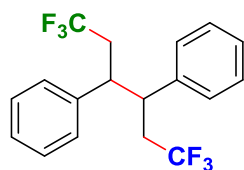

This compound was prepared according to typical reaction procedure of photoredox-catalyzed three-component alkene carbotrifluoromethylation and purified by column chromatography (petroleum ether as eluant) to offer the product. Colorless oil; 50.5 mg, 73%; anti : syn = 3.33 : 1 (the diastereoisomers could not be isolated);  $^1\text{H}$  NMR (600 MHz,  $\text{CDCl}_3$ ):  $\delta$  [ppm] = 7.40-7.37 (m, 4H), 7.33-7.30 (m, 2H), 7.25-7.23 (m, 4H), 7.22-7.19 (m, 1.8H), 6.80-6.79 (m, 1.2H), 3.37-3.34 (m, 0.6H), 3.09-3.04 (m, 2H), 2.61-2.52 (m, 0.6H), 2.42-2.33 (m, 0.6H), 2.27-2.20 (m, 2H), 2.14-2.06 (m, 2H);  $^{13}\text{C}$  NMR (150 MHz,  $\text{CDCl}_3$ ):  $\delta$  [ppm] = 140.6, 138.1, 129.4, 129.2, 128.02, 127.98, 127.8, 127.5, 126.6 (q,  $J_{\text{CF}} = 277.3$  Hz), 126.4 (q,  $J_{\text{CF}} = 275.2$  Hz), 45.9, 43.7, 38.3 (q,  $J_{\text{CF}} = 27.5$  Hz), 37.6 (q,  $J_{\text{CF}} = 27.4$  Hz);  $^{19}\text{F}$  NMR (564 MHz,  $\text{CDCl}_3$ ):  $\delta$  [ppm] = -63.2 (t,  $J = 10.6$  Hz, 1.8F), -63.4 (t,  $J = 10.7$  Hz, 6F).<sup>[1]</sup>

4,4'-(1,1,1,6,6,6-hexafluorohexane-3,4-diyl)bis(fluorobenzene) (**9**)

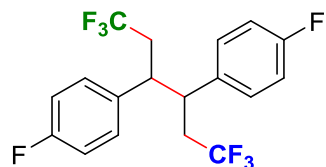

This compound was prepared according to typical reaction procedure of photoredox-catalyzed three-component alkene carbotrifluoromethylation and purified by column chromatography (petroleum ether as eluant) to offer the product. Colorless oil; 64.2 mg, 84%; syn (one of the diastereoisomers could be isolated);  $^1\text{H}$  NMR (600 MHz,  $\text{CDCl}_3$ ):  $\delta$  [ppm] = 6.92-6.90 (m, 4H), 6.76-6.74 (m, 4H), 3.33-3.30 (m, 2H), 2.57-2.49 (m, 2H), 2.38-2.29 (m, 2H);  $^{13}\text{C}$  NMR (150 MHz,  $\text{CDCl}_3$ ):  $\delta$  [ppm] = 162.0 (d,  $J_{\text{CF}} = 244.8$  Hz), 133.6 (d,  $J_{\text{CF}} = 2.6$  Hz), 130.7 (d,  $J_{\text{CF}} = 8.1$  Hz), 126.4 (q,  $J_{\text{CF}} = 273.7$  Hz), 115.1 (d,  $J_{\text{CF}} = 21.2$  Hz), 43.1, 37.9 (q,  $J_{\text{CF}} = 27.6$  Hz);  $^{19}\text{F}$  NMR (564 MHz,  $\text{CDCl}_3$ ):  $\delta$  [ppm] = -63.2 (t,  $J = 10.6$  Hz, 6F), -114.5 (s, 2F).<sup>[1]</sup>

4,4'-(1,1,1,6,6,6-hexafluorohexane-3,4-diyl)bis(chlorobenzene) (**10**)

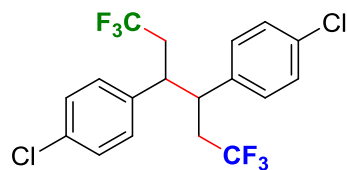

This compound was prepared according to typical reaction procedure of photoredox-catalyzed three-component alkene carbotrifluoromethylation and purified by column chromatography (petroleum ether as eluant) to offer the product. Pale



yellow solid; 59.6 mg, 72%; anti : syn = 1.37 : 1 (the diastereoisomers could not be isolated);  $^1\text{H}$  NMR (600 MHz,  $\text{CDCl}_3$ ):  $\delta$  [ppm] = 7.37-7.36 (d,  $J$  = 8.3 Hz, 4H), 7.21-7.19 (d,  $J$  = 8.2 Hz, 2.9H), 7.16-7.15 (d,  $J$  = 8.3 Hz, 4H), 6.74-6.72 (d,  $J$  = 8.3 Hz, 2.9H), 3.33-3.29 (m, 1.5H), 3.05-3.00 (m, 2H), 2.56-2.48 (m, 1.5H), 2.38-2.29 (m, 1.5H), 2.25-2.16 (m, 2H), 2.12-2.04 (m, 2H);  $^{13}\text{C}$  NMR (150 MHz,  $\text{CDCl}_3$ ):  $\delta$  [ppm] = 138.6, 136.2, 133.8, 133.6, 130.5, 129.5, 129.2, 128.4, 126.3 (q,  $J_{\text{CF}}$  = 277.4 Hz), 126.1 (q,  $J_{\text{CF}}$  = 276.5 Hz), 45.2, 43.2, 38.2 (q,  $J_{\text{CF}}$  = 27.7 Hz), 37.7 (q,  $J_{\text{CF}}$  = 27.6 Hz);  $^{19}\text{F}$  NMR (564 MHz,  $\text{CDCl}_3$ ):  $\delta$  [ppm] = -63.1 (t,  $J$  = 10.6 Hz, 4.4F), -63.3 (t,  $J$  = 10.6 Hz, 6F).<sup>[1]</sup>

3,3'-(1,1,1,6,6,6-hexafluoroethane-3,4-diyl)bis(chlorobenzene) (**11**)

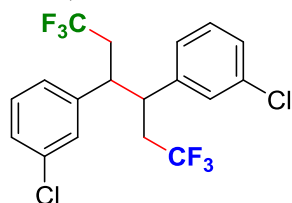

This compound was prepared according to typical reaction procedure of photoredox-catalyzed three-component alkene carbotrifluoromethylation and purified by column chromatography (petroleum ether as eluant) to offer the product. Pale yellow solid; 55.5 mg, 67%; anti : syn = 0.88 : 1 (the diastereoisomers could not be isolated);  $^1\text{H}$  NMR (600 MHz,  $\text{CDCl}_3$ ):  $\delta$  [ppm] = 7.35-7.30 (m, 4H), 7.23-7.21 (m, 4.5H), 7.18-7.15 (t,  $J$  = 7.8 Hz, 2.3H), 7.12-7.10 (m, 2H), 6.77-6.76 (m, 2.3H), 6.71-6.70 (m, 2.3H), 3.32-3.28 (m, 2.3H), 3.05-3.00 (m, 2H), 2.58-2.50 (m, 2.3H), 2.42-2.33 (m, 2.3H), 2.29-2.20 (m, 2H), 2.13-2.05 (m, 2H);  $^{13}\text{C}$  NMR (150 MHz,  $\text{CDCl}_3$ ):  $\delta$  [ppm] = 142.2, 139.8, 135.2, 134.2, 130.6, 129.5, 129.2, 128.3, 128.1, 128.0, 127.4, 126.2 (q,  $J_{\text{CF}}$  = 272.7 Hz), 126.1, 126.0 (q,  $J_{\text{CF}}$  = 274.2 Hz), 45.5, 43.5, 38.1 (q,  $J_{\text{CF}}$  = 27.4 Hz), 37.6 (q,  $J_{\text{CF}}$  = 27.6 Hz);  $^{19}\text{F}$  NMR (564 MHz,  $\text{CDCl}_3$ ):  $\delta$  [ppm] = -63.2 (t,  $J$  = 10.6 Hz, 6.8F), -63.3 (t,  $J$  = 10.7 Hz, 6F); HRMS (ESI)  $m/z$ :  $[\text{M}+\text{H}]^+$  calcd. for  $\text{C}_{18}\text{H}_{15}\text{Cl}_2\text{F}_6$  415.0455; found 415.0463.

4,4'-(1,1,1,6,6,6-hexafluoroethane-3,4-diyl)bis(bromobenzene) (**13**)

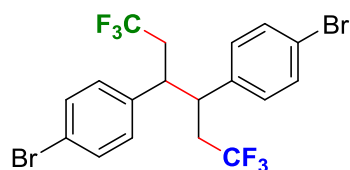

This compound was prepared according to typical reaction procedure of photoredox-catalyzed three-component alkene carbotrifluoromethylation and purified by column chromatography (petroleum ether as eluant) to offer the product. Pale yellow solid; 65.2 mg, 65%; anti : syn = 0.97 : 1 (the diastereoisomers could not be isolated);  $^1\text{H}$  NMR (600 MHz,  $\text{CDCl}_3$ ):  $\delta$  [ppm] = 7.53-7.51 (d,  $J$  = 7.8 Hz, 4H), 7.36-7.35 (d,  $J$  = 7.7 Hz, 4H), 7.10-7.09 (d,  $J$  = 7.8 Hz, 4.1H), 6.68-6.67 (d,  $J$  = 7.8 Hz, 4.1H), 3.32-3.28 (m, 2.1H), 3.04-2.99 (m, 2H), 2.56-2.48 (m, 2.1H), 2.37-2.30 (m, 2.1H), 2.23-2.16 (m, 2H), 2.12-2.04 (m, 2H);  $^{13}\text{C}$  NMR (150 MHz,  $\text{CDCl}_3$ ):  $\delta$  [ppm] =

139.1, 136.7, 132.5, 131.4, 130.8, 129.6, 126.3 (q,  $J_{CF} = 275.8$  Hz), 126.1 (q,  $J_{CF} = 276.2$  Hz), 121.9, 121.8, 45.2, 43.2, 38.1 (q,  $J_{CF} = 27.5$  Hz), 37.7 (q,  $J_{CF} = 27.6$  Hz);  $^{19}\text{F}$  NMR (564 MHz,  $\text{CDCl}_3$ ):  $\delta$  [ppm] = -63.1 (t,  $J = 10.6$  Hz, 6F), -63.3 (t,  $J = 10.6$  Hz, 6F).<sup>[1]</sup>

3,3'-(1,1,1,6,6,6-hexafluoroethane-3,4-diyl)bis(bromobenzene) (**14**)

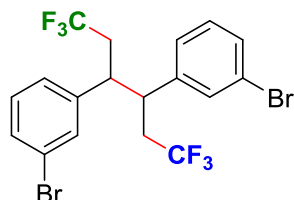

This compound was prepared according to typical reaction procedure of photoredox-catalyzed three-component alkene carbotrifluoromethylation and purified by column chromatography (petroleum ether as eluant) to offer the product. Pale yellow oil; 55.2 mg, 55%; anti : syn = 1 : 1 (the diastereoisomers could not be isolated);  $^1\text{H}$  NMR (600 MHz,  $\text{CDCl}_3$ ):  $\delta$  [ppm] = 7.48-7.46 (m, 2H), 7.39-7.37 (m, 4H), 7.29-7.26 (t,  $J = 7.8$  Hz, 2H), 7.16-7.15 (m, 2H), 7.13-7.10 (t,  $J = 7.8$  Hz, 2H), 6.90 (s, 2H), 6.76-6.75 (m, 2H), 3.31-3.28 (m, 2H), 3.03-2.99 (m, 2H), 2.57-2.48 (m, 2H), 2.41-2.31 (m, 2H), 2.28-2.21 (m, 2H), 2.13-2.05 (m, 2H);  $^{13}\text{C}$  NMR (150 MHz,  $\text{CDCl}_3$ ):  $\delta$  [ppm] = 142.4, 139.9, 132.1, 131.3, 131.0, 130.93, 130.89, 129.7, 127.9, 126.5, 126.2 (q,  $J_{CF} = 276.7$  Hz), 126.0 (q,  $J_{CF} = 274.1$  Hz), 123.3, 122.3, 45.4, 43.4, 38.2 (q,  $J_{CF} = 27.6$  Hz), 37.6 (q,  $J_{CF} = 27.6$  Hz);  $^{19}\text{F}$  NMR (564 MHz,  $\text{CDCl}_3$ ):  $\delta$  [ppm] = -63.2 (t,  $J = 10.6$  Hz, 6F), -63.3 (t,  $J = 10.6$  Hz, 6F); HRMS (ESI)  $m/z$ :  $[\text{M}+\text{Na}]^+$  calcd. for  $\text{C}_{18}\text{H}_{14}\text{Br}_2\text{F}_6\text{Na}$  524.9264; found 524.9260.

((1,1,1,6,6,6-hexafluoroethane-3,4-diyl)bis(4,1-phenylene))bis(pyrrolidin-1-ylmethanone) (**16**)

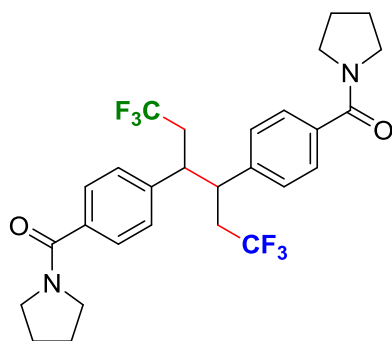

This compound was prepared according to typical reaction procedure of photoredox-catalyzed three-component alkene carbotrifluoromethylation and purified by column chromatography (petroleum ether/ethyl acetate (10:1) as eluant) to offer the product. Pale yellow oil; 65% (determined by  $^{19}\text{F}$  NMR); anti (Togni reagent as impurity could not be isolated);  $^1\text{H}$  NMR (600 MHz,  $\text{CDCl}_3$ ):  $\delta$  [ppm] = 7.54-7.53 (d,  $J = 8.0$  Hz, 4H), 7.27-7.26 (d,  $J = 8.0$  Hz, 4H), 3.63-3.61 (t,  $J = 7.0$  Hz, 4H), 3.41-3.39 (t,  $J = 6.9$  Hz, 4H), 3.12-3.06 (m, 2H), 2.27-2.18 (m, 2H), 2.11-2.03 (m, 2H), 1.96-1.92 (m, 4H), 1.88-1.83 (m, 4H);  $^{13}\text{C}$  NMR (150 MHz,  $\text{CDCl}_3$ ):  $\delta$  [ppm] =

169.2, 142.1, 136.7, 128.1, 127.9, 107.1 (q,  $J_{CF} = 276.5$  Hz), 49.7, 46.4, 45.5, 38.1 (q,  $J_{CF} = 27.6$  Hz), 26.5, 24.5;  $^{19}\text{F}$  NMR (564 MHz,  $\text{CDCl}_3$ ):  $\delta$  [ppm] = -63.3 (t,  $J = 10.5$  Hz, 6F); HRMS (ESI)  $m/z$ :  $[\text{M}+\text{H}]^+$  calcd. for  $\text{C}_{28}\text{H}_{31}\text{F}_6\text{N}_2\text{O}_2$  541.2290; found 541.2282.

dimethyl 4,4'-(1,1,1,6,6,6-hexafluorohexane-3,4-diyl)dibenzoate (**17**)

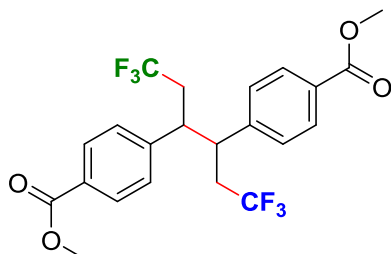

This compound was prepared according to typical reaction procedure of photoredox-catalyzed three-component alkene carbotrifluoromethylation and purified by column chromatography (petroleum ether/ethyl acetate (30:1) as eluant) to offer the product. White solid; 57.3 mg, 62%; anti : syn = 1.07 : 1 (the diastereoisomers could not be isolated);  $^1\text{H}$  NMR (600 MHz,  $\text{CDCl}_3$ ):  $\delta$  [ppm] = 8.08-8.07 (d,  $J = 8.4$  Hz, 4H), 7.86-7.85 (d,  $J = 8.2$  Hz, 3.7H), 7.33-7.31 (d,  $J = 8.4$  Hz, 4H), 6.89-6.87 (d,  $J = 8.4$  Hz, 3.7H), 3.93 (s, 6H), 3.88 (s, 5.6H), 3.41-3.38 (m, 1.9H), 3.19-3.15 (m, 2H), 2.65-2.56 (m, 1.9H), 2.49-2.41 (m, 1.9H), 2.31-2.24 (m, 2H), 2.10-2.02 (m, 2H);  $^{13}\text{C}$  NMR (150 MHz,  $\text{CDCl}_3$ ):  $\delta$  [ppm] = 116.7, 116.6, 145.3, 143.3, 130.6, 130.0, 129.5, 129.1, 128.1, 126.2 (q,  $J_{CF} = 274.5$  Hz), 126.0 (q,  $J_{CF} = 276.8$  Hz), 52.4, 52.3, 45.6, 44.0, 38.3 (q,  $J_{CF} = 27.6$  Hz), 37.9 (q,  $J_{CF} = 27.8$  Hz);  $^{19}\text{F}$  NMR (564 MHz,  $\text{CDCl}_3$ ):  $\delta$  [ppm] = -63.2 (t,  $J = 10.6$  Hz, 5.6F), -63.4 (t,  $J = 10.6$  Hz, 6F); HRMS (ESI)  $m/z$ :  $[\text{M}+\text{H}]^+$  calcd. for  $\text{C}_{22}\text{H}_{21}\text{F}_6\text{O}_4$  463.1344; found 463.1355.

4,4'-(1,1,1,6,6,6-hexafluorohexane-3,4-diyl)bis((trifluoromethyl)benzene) (**18**)

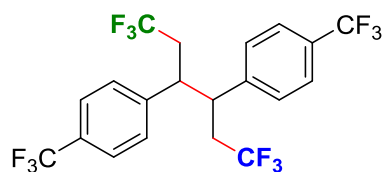

This compound was prepared according to typical reaction procedure of photoredox-catalyzed three-component alkene carbotrifluoromethylation and purified by column chromatography (petroleum ether/ethyl acetate (100:1) as eluant) to offer the product. Colorless oil; 49.1 mg, 51%; anti : syn = 1 : 1 (the diastereoisomers could not be isolated);  $^1\text{H}$  NMR (600 MHz,  $\text{CDCl}_3$ ):  $\delta$  [ppm] = 7.68-7.67 (d,  $J = 8.2$  Hz, 4H), 7.49-7.48 (d,  $J = 8.2$  Hz, 4H), 7.38-7.36 (d,  $J = 8.2$  Hz, 4H), 6.94-6.93 (d,  $J = 8.1$  Hz, 4H), 3.45-3.41 (m, 2H), 3.22-3.17 (m, 2H), 2.64-2.56 (m, 2H), 2.46-2.37 (m, 2H), 2.33-2.23 (m, 2H), 2.12-2.04 (m, 2H);  $^{13}\text{C}$  NMR (150 MHz,  $\text{CDCl}_3$ ):  $\delta$  [ppm] = 144.0, 141.9, 130.5 (q,  $J_{CF} = 32.7$  Hz), 130.1 (q,  $J_{CF} = 32.6$  Hz), 129.5, 128.4, 126.4 (q,  $J_{CF} = 2.9$  Hz), 126.1 (q,  $J_{CF} = 274.9$  Hz), 125.9 (q,  $J_{CF} = 276.3$  Hz), 125.3 (q,  $J_{CF} = 2.8$  Hz), 124.0 (q,  $J_{CF} = 278.2$  Hz), 123.8 (q,  $J_{CF} = 276.8$  Hz), 45.5, 43.7, 38.2 (q,  $J_{CF} =$

27.2 Hz), 37.7 (q,  $J_{CF} = 27.5$  Hz);  $^{19}\text{F}$  NMR (564 MHz,  $\text{CDCl}_3$ ):  $\delta$  [ppm] = -62.50 (s, 6F), -62.52 (s, 6F), -63.2 (t,  $J = 10.6$  Hz, 6F), -63.4 (t,  $J = 10.5$  Hz, 6F).<sup>[1]</sup>

4,4'-(1,1,1,6,6,6-hexafluoroethane-3,4-diyl)dibenzonitrile (**19**)

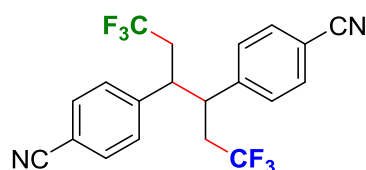

This compound was prepared according to typical reaction procedure of photoredox-catalyzed three-component alkene carbotrifluoromethylation and purified by column chromatography (petroleum ether/ethyl acetate (100:1) as eluant) to offer the product. Pale yellow solid; 42.7 mg, 54%; anti : syn = 0.33 : 1 (the diastereoisomers could not be isolated);  $^1\text{H}$  NMR (600 MHz,  $\text{CDCl}_3$ ):  $\delta$  [ppm] = 7.73-7.71 (d,  $J = 8.2$  Hz, 4H), 7.51-7.50 (d,  $J = 8.3$  Hz, 12H), 7.36-7.35 (d,  $J = 8.2$  Hz, 4H), 6.95-6.94 (m, 12H), 3.38-3.34 (m, 6H), 3.20-3.15 (m, 2H), 2.66-2.59 (m, 6H), 2.50-2.41 (m, 6H), 2.33-2.25 (m, 2H), 2.01-1.98 (m, 2H);  $^{13}\text{C}$  NMR (150 MHz,  $\text{CDCl}_3$ ):  $\delta$  [ppm] = 145.0, 143.5, 133.2, 132.3, 129.5, 128.8, 125.9 (q,  $J_{CF} = 279.1$  Hz), 125.5 (q,  $J_{CF} = 276.3$  Hz), 118.21, 118.17, 112.5, 112.0, 45.6, 44.3, 38.0 (q,  $J_{CF} = 27.1$  Hz), 37.7 (q,  $J_{CF} = 27.5$  Hz);  $^{19}\text{F}$  NMR (564 MHz,  $\text{CDCl}_3$ ):  $\delta$  [ppm] = -63.2 (t,  $J = 10.4$  Hz, 18F), -63.3 (t,  $J = 10.7$  Hz, 6F).<sup>[1]</sup>

4,4'-(1,1,1,6,6,6-hexafluoroethane-3,4-diyl)bis((chloromethyl)benzene) (**20**)

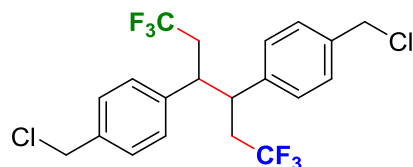

This compound was prepared according to typical reaction procedure of photoredox-catalyzed three-component alkene carbotrifluoromethylation and purified by column chromatography (petroleum ether as eluant) to offer the product. Colorless oil; 65.4 mg, 74%; anti : syn = 0.71 : 1 (the diastereoisomers could not be isolated);  $^1\text{H}$  NMR (600 MHz,  $\text{CDCl}_3$ ):  $\delta$  [ppm] = 7.42-7.41 (d,  $J = 8.2$  Hz, 4H), 7.25-7.23 (m, 9.6H), 6.80-6.79 (d,  $J = 8.2$  Hz, 5.6H), 4.60 (s, 4H), 4.54 (s, 5.6H), 3.39-3.35 (m, 2.8H), 3.11-3.06 (m, 2H), 2.59-2.50 (m, 2.8H), 2.40-2.32 (m, 2.8H), 2.26-2.18 (m, 2H), 2.13-2.06 (m, 2H);  $^{13}\text{C}$  NMR (150 MHz,  $\text{CDCl}_3$ ):  $\delta$  [ppm] = 140.6, 138.1, 137.1, 136.8, 129.7, 129.4, 128.3, 126.5 (q,  $J_{CF} = 272.4$  Hz), 126.3 (q,  $J_{CF} = 275.1$  Hz), 45.8, 45.5, 43.4, 38.2 (q,  $J_{CF} = 27.6$  Hz), 37.6 (q,  $J_{CF} = 27.6$  Hz);  $^{19}\text{F}$  NMR (564 MHz,  $\text{CDCl}_3$ ):  $\delta$  [ppm] = -63.1 (t,  $J = 10.6$  Hz, 8.4F), -63.3 (t,  $J = 10.4$  Hz, 6F).<sup>[1]</sup>

4,4'-(1,1,1,6,6,6-hexafluoroethane-3,4-diyl)di-1,1'-biphenyl (**21**)

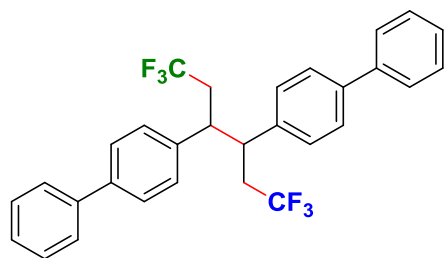

This compound was prepared according to typical reaction procedure of photoredox-catalyzed three-component alkene carbotrifluoromethylation and purified by column chromatography (petroleum ether as eluant) to offer the product. Pale yellow oil; 45.8 mg, 46%; syn (one of the diastereoisomers could be isolated);  $^1\text{H}$  NMR (600 MHz,  $\text{CDCl}_3$ ):  $\delta$  [ppm] = 7.59-7.57 (m, 4H), 7.49-7.47 (m, 4H), 7.45-7.42 (m, 4H), 7.36-7.33 (m, 2H), 6.92-6.91 (m, 4H), 3.48-3.44 (m, 2H), 2.67-2.59 (m, 2H), 2.48-2.39 (m, 2H);  $^{13}\text{C}$  NMR (150 MHz,  $\text{CDCl}_3$ ):  $\delta$  [ppm] = 140.4, 140.3, 136.9, 129.9, 128.9, 127.5, 127.1, 126.7 (q,  $J_{\text{CF}} = 276.3$  Hz), 43.3, 37.6 (q,  $J_{\text{CF}} = 27.3$  Hz);  $^{19}\text{F}$  NMR (564 MHz,  $\text{CDCl}_3$ ):  $\delta$  [ppm] = -63.1 (t,  $J = 10.8$  Hz, 6F); HRMS (ESI)  $m/z$ :  $[\text{M}+\text{H}]^+$  calcd. for  $\text{C}_{30}\text{H}_{25}\text{F}_6$  499.1860; found 499.1864.

**2,2'-(1,1,1,6,6,6-hexafluoro-3,4-diyl)dipyridine (22)**

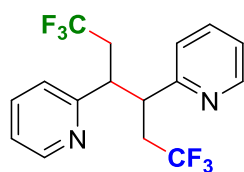

This compound was prepared according to typical reaction procedure of photoredox-catalyzed three-component alkene carbotrifluoromethylation and purified by column chromatography (petroleum ether/ethyl acetate (8:1) as eluant) to offer the product. Pale yellow oil; 48.7 mg, 70%; syn (one of the diastereoisomers could be isolated);  $^1\text{H}$  NMR (600 MHz,  $\text{CDCl}_3$ ):  $\delta$  [ppm] = 8.66-8.65 (m, 2H), 7.67-7.64 (m, 2H), 7.23-7.20 (m, 4H), 3.54-3.49 (m, 2H), 2.75-2.67 (m, 2H), 1.91-1.83 (m, 2H);  $^{13}\text{C}$  NMR (150 MHz,  $\text{CDCl}_3$ ):  $\delta$  [ppm] = 159.7, 150.3, 136.8, 126.8 (q,  $J_{\text{CF}} = 278.3$  Hz), 125.1, 122.6, 45.7, 36.9 (q,  $J_{\text{CF}} = 27.2$  Hz);  $^{19}\text{F}$  NMR (564 MHz,  $\text{CDCl}_3$ ):  $\delta$  [ppm] = -63.8 (t,  $J = 10.6$  Hz, 6F); HRMS (ESI)  $m/z$ :  $[\text{M}+\text{H}]^+$  calcd. for  $\text{C}_{16}\text{H}_{15}\text{F}_6\text{N}_2$  349.1139; found 349.1146.

**(1,1,1,6,6,6-hexafluoro-3,4-dimethylhexane-3,4-diyl)dibenzene (23)**

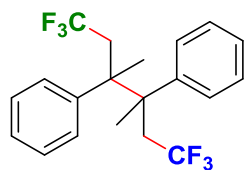

This compound was prepared according to typical reaction procedure of photoredox-catalyzed three-component alkene carbotrifluoromethylation and purified by column chromatography (petroleum ether as eluant) to offer the product. Colorless

oil; 58.3 mg, 78%; anti : syn = 1.11 : 1 (the diastereoisomers could not be isolated);  $^1\text{H}$  NMR (600 MHz,  $\text{CDCl}_3$ ):  $\delta$  [ppm] = 7.26-7.25 (m, 12H), 7.06-7.01 (d,  $J$  = 34.9 Hz, 7H), 3.13-3.04 (m, 1.8H), 2.62-2.54 (m, 2H), 2.51-2.43 (m, 2H), 2.30-2.22 (m, 1.8H), 1.51 (s, 6H), 1.48 (s, 5.4H);  $^{13}\text{C}$  NMR (150 MHz,  $\text{CDCl}_3$ ):  $\delta$  [ppm] = 140.5, 140.3, 128.8, 128.6, 127.6 (q,  $J_{\text{CF}}$  = 275.8 Hz), 127.3, 127.0, 126.8 (q,  $J_{\text{CF}}$  = 277.4 Hz), 45.9, 45.6, 39.1 (q,  $J_{\text{CF}}$  = 27.3 Hz), 38.8 (q,  $J_{\text{CF}}$  = 27.6 Hz), 21.3, 20.8;  $^{19}\text{F}$  NMR (564 MHz,  $\text{CDCl}_3$ ):  $\delta$  [ppm] = -56.2 (t,  $J$  = 10.6 Hz, 5.4F), -56.4 (t,  $J$  = 10.6 Hz, 6F).<sup>[1]</sup>

(2,3-bis(2,2,2-trifluoroethyl)butane-1,4-diyl)dibenzene (**24**)

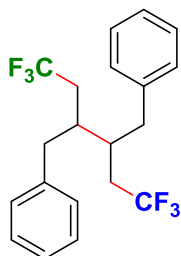

This compound was prepared according to typical reaction procedure of photoredox-catalyzed three-component alkene carbotrifluoromethylation and purified by column chromatography (petroleum ether as eluant) to offer the product. Colorless oil; 28.4 mg, 38%; anti : syn = 0.88 : 1 (the diastereoisomers could not be isolated);  $^1\text{H}$  NMR (600 MHz,  $\text{CDCl}_3$ ):  $\delta$  [ppm] = 7.31-7.28 (m, 4.5H), 7.25-7.19 (m, 8.3H), 7.09-7.08 (d,  $J$  = 7.0 Hz, 4H), 7.00-6.98 (d,  $J$  = 7.1 Hz, 4.5H), 2.83-2.79 (dd,  $J$  = 13.9, 7.0 Hz, 2H), 2.68-2.65 (dd,  $J$  = 13.9, 7.1 Hz, 2.3H), 2.63-2.57 (m, 4H), 2.35-2.29 (m, 4.5H), 2.23-2.15 (m, 2H), 2.12-2.06 (m, 2H), 2.01-1.94 (m, 4.5H);  $^{13}\text{C}$  NMR (150 MHz,  $\text{CDCl}_3$ ):  $\delta$  [ppm] = 138.7, 138.6, 128.9, 128.8, 128.7, 126.8, 126.6, 127.1 (q,  $J_{\text{CF}}$  = 278.5 Hz), 36.3, 36.2, 35.0, 34.9, 33.8 (q,  $J_{\text{CF}}$  = 27.2 Hz), 33.7 (q,  $J_{\text{CF}}$  = 27.3 Hz);  $^{19}\text{F}$  NMR (564 MHz,  $\text{CDCl}_3$ ):  $\delta$  [ppm] = -63.0 (t,  $J$  = 10.9 Hz, 6.8F), -63.3 (t,  $J$  = 10.9 Hz, 6F); HRMS (ESI)  $m/z$ :  $[\text{M}+\text{H}]^+$  calcd. for  $\text{C}_{20}\text{H}_{21}\text{F}_6$  375.1547; found 375.1550.

(3,4-bis(2,2,2-trifluoroethyl)hexane-1,6-diyl)dibenzene (**25**)

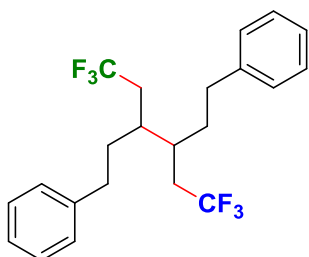

This compound was prepared according to typical reaction procedure of photoredox-catalyzed three-component alkene carbotrifluoromethylation and purified by column chromatography (petroleum ether as eluant) to offer the product. Colorless oil; 21.7 mg, 27%; anti : syn = 1.12 : 1 (the diastereoisomers could not be isolated);  $^1\text{H}$  NMR (600 MHz,  $\text{CDCl}_3$ ):  $\delta$  [ppm] = 7.29-7.27 (m, 8H), 7.21-7.18 (m, 4H), 7.16-7.13 (m, 4H), 7.11-7.08 (m, 4H), 2.62-2.39 (m, 8H), 2.19-1.93 (m, 12H),

1.68-1.57 (m, 8H);  $^{13}\text{C}$  NMR (150 MHz,  $\text{CDCl}_3$ ):  $\delta$  [ppm] = 141.3, 128.63, 128.61, 128.5, 128.4, 127.6 (q,  $J_{\text{CF}} = 276.2$  Hz), 127.2 (q,  $J_{\text{CF}} = 278.4$  Hz), 126.3, 126.2, 34.9 (q,  $J_{\text{CF}} = 27.5$  Hz), 34.7 (q,  $J_{\text{CF}} = 27.4$  Hz), 33.9, 33.8, 33.7, 33.6, 32.9, 32.5;  $^{19}\text{F}$  NMR (564 MHz,  $\text{CDCl}_3$ ):  $\delta$  [ppm] = -63.7 (t,  $J = 10.8$  Hz, 5.4F), -63.8 (t,  $J = 10.9$  Hz, 6F); HRMS (ESI)  $m/z$ :  $[\text{M}+\text{H}]^+$  calcd. for  $\text{C}_{22}\text{H}_{25}\text{F}_6$  403.1860; found 403.1855.

4-(2,2,2-trifluoroethyl)chromane-8-carbaldehyde (26) and  
2-((5,5,5-trifluoropentyl)oxy)benzaldehyde (27)

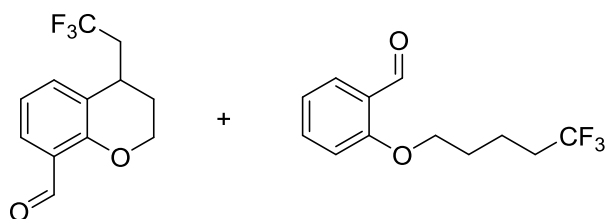

This compound was prepared according to typical reaction procedure of photoredox-catalyzed three-component alkene carbotrifluoromethylation and purified by column chromatography (petroleum ether/ethyl acetate (10:1) as eluant) to offer the product. Yellow oil; 39.7 mg, 41%; **26** : **27** = 4 : 1 (the mixture could not be isolated);  $^1\text{H}$  NMR (600 MHz,  $\text{CDCl}_3$ ):  $\delta$  [ppm] = 10.48 (d,  $J = 0.8$  Hz, 0.3H), 10.39 (d,  $J = 0.7$  Hz, 1H), 7.83-7.82 (dd,  $J = 7.7, 1.9$  Hz, 0.3H), 7.69-7.68 (dd,  $J = 7.7, 1.8$  Hz, 1H), 7.54-7.52 (m, 0.3H), 7.34-7.32 (m, 1H), 7.03-7.01 (m, 0.3H), 6.97-6.94 (m, 1H), 4.39-4.35 (m, 1H), 4.29-4.24 (m, 1H), 4.11-4.09 (t,  $J = 6.1$  Hz, 0.5H), 3.29-3.25 (m, 1H), 2.60-2.51 (m, 1H), 2.43-2.33 (m, 1H), 2.28-2.22 (m, 1H), 2.20-2.15 (m, 0.5H), 2.08-2.03 (m, 1H), 1.96-1.92 (m, 0.5H), 1.82-1.77 (m, 0.5H);  $^{13}\text{C}$  NMR (150 MHz,  $\text{CDCl}_3$ ):  $\delta$  [ppm] = 189.8, 189.7, 161.2, 157.3, 136.1, 135.3, 128.6, 127.7, 127.1 (q,  $J_{\text{CF}} = 275.1$  Hz), 126.4 (q,  $J_{\text{CF}} = 272.2$  Hz), 125.0, 124.8, 120.9, 120.5, 112.4, 67.7, 63.3, 40.2 (q,  $J_{\text{CF}} = 27.1$  Hz), 33.5 (q,  $J_{\text{CF}} = 27.4$  Hz), 28.3, 26.3, 19.3, 19.0;  $^{19}\text{F}$  NMR (564 MHz,  $\text{CDCl}_3$ ):  $\delta$  [ppm] = -63.5 (t,  $J = 10.7$  Hz, 3F), -66.2 (t,  $J = 10.5$  Hz, 0.8F); HRMS (ESI)  $m/z$ :  $[\text{M}+\text{H}]^+$  calcd. for  $\text{C}_{12}\text{H}_{12}\text{F}_3\text{O}_2$  245.0789; found 245.0795; HRMS (ESI)  $m/z$ :  $[\text{M}+\text{H}]^+$  calcd. for  $\text{C}_{12}\text{H}_{14}\text{F}_3\text{O}_2$  247.0946; found 247.0956.

(1,1,1,6,6-pentafluorohexane-3,4-diyl)dibenzene (30)

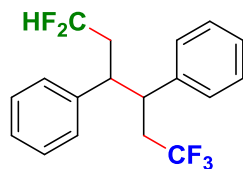

This compound was prepared according to typical reaction procedure of photoredox-catalyzed three-component alkene carbotrifluoromethylation and purified by column chromatography (petroleum ether as eluant) to offer the product. Colorless oil; 25.6 mg, 39%; anti : syn = 1 : 1 (the diastereoisomers could not be isolated);  $^1\text{H}$  NMR (600 MHz,  $\text{CDCl}_3$ ):  $\delta$  [ppm] = 7.41-7.36 (m, 5H), 7.33-7.29 (m, 3H), 7.23-7.18 (m, 8H), 6.85-6.83 (m, 4H), 5.51-5.30 (m, 1H), 5.26-5.07 (m, 1H), 3.26-3.23 (m, 1H), 3.18-3.15 (m, 1H), 3.09-3.05 (t,  $J = 11.0$  Hz, 1H), 2.95-2.91 (m, 1H), 2.62-2.54 (m,



1H), 2.46-2.37 (m, 1H), 2.30-2.24 (m, 2H), 2.18-2.08 (m, 2H), 1.92-1.77 (m, 2H); <sup>13</sup>C NMR (150 MHz, CDCl<sub>3</sub>): δ [ppm] = 140.8, 140.7, 138.9, 138.1, 129.5, 129.2, 129.1, 129.0, 128.4, 128.01, 127.97, 127.9, 127.6, 127.5, 127.4, 127.2, 126.6 (q, *J*<sub>CF</sub> = 271.9 Hz), 116.5 (t, *J*<sub>CF</sub> = 237.2 Hz), 46.4 (d, *J*<sub>CF</sub> = 8.7 Hz), 46.0, 44.7 (d, *J*<sub>CF</sub> = 8.7 Hz), 44.6, 38.8 (t, *J*<sub>CF</sub> = 21.8 Hz), 38.4 (q, *J*<sub>CF</sub> = 27.6 Hz), 38.2 (t, *J*<sub>CF</sub> = 21.5 Hz), 37.5 (q, *J*<sub>CF</sub> = 27.4 Hz); <sup>19</sup>F NMR (564 MHz, CDCl<sub>3</sub>): δ [ppm] = -63.2 (t, *J* = 10.6 Hz, 3F), -63.4 (t, *J* = 10.5 Hz, 3F), -114.3--116.2 (m, 2F), -117.5--119.0 (m, 2F); HRMS (ESI) *m/z*: [M+H]<sup>+</sup> calcd. for C<sub>18</sub>H<sub>18</sub>F<sub>5</sub> 329.1329; found 329.1331.

#### 4,4'-(1,1,1,6,6-pentafluorohexane-3,4-diyl)bis(bromobenzene) (**31**)

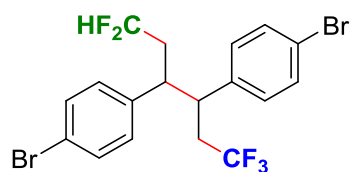

This compound was prepared according to typical reaction procedure of photoredox-catalyzed three-component alkene carbotrifluoromethylation and purified by column chromatography (petroleum ether as eluant) to offer the product. Pale yellow solid; 33.8 mg, 35%; anti : syn = 1 : 1 (the diastereoisomers could not be isolated); <sup>1</sup>H NMR (600 MHz, CDCl<sub>3</sub>): δ [ppm] = 7.54-7.50 (m, 4H), 7.36-7.32 (m, 4H), 7.11-7.08 (t, *J* = 7.8 Hz, 4H), 6.73-6.70 (t, *J* = 7.8 Hz, 4H), 5.51-5.10 (m, 2H), 3.21-3.18 (m, 1H), 3.13-3.10 (m, 1H), 3.04-3.00 (m, 1H), 2.91-2.87 (m, 1H), 2.59-2.51 (m, 1H), 2.40-2.33 (m, 1H), 2.31-2.18 (m, 2H), 2.14-2.05 (m, 2H), 1.88-1.76 (m, 2H); <sup>13</sup>C NMR (150 MHz, CDCl<sub>3</sub>): δ [ppm] = 139.4, 139.3, 137.6, 137.0, 132.7, 132.3, 131.7, 131.4, 130.6, 130.5, 129.6, 126.3 (q, *J*<sub>CF</sub> = 276.0 Hz), 126.2 (q, *J*<sub>CF</sub> = 274.8 Hz), 121.9, 121.67, 121.62, 121.4, 116.0 (t, *J*<sub>CF</sub> = 236.8 Hz), 115.9 (t, *J*<sub>CF</sub> = 238.1 Hz), 45.63, 45.58, 45.3, 44.1, 44.0, 38.5 (q, *J*<sub>CF</sub> = 27.3 Hz), 38.3 (t, *J*<sub>CF</sub> = 21.5 Hz), 38.0 (q, *J*<sub>CF</sub> = 27.6 Hz), 37.5 (t, *J*<sub>CF</sub> = 21.7 Hz); <sup>19</sup>F NMR (564 MHz, CDCl<sub>3</sub>): δ [ppm] = -63.1 (t, *J* = 10.6 Hz, 3F), -63.3 (t, *J* = 10.5 Hz, 3F), -114.3--116.2 (m, 2F), -117.4--118.8 (m, 2F); HRMS (ESI) *m/z*: [M+H]<sup>+</sup> calcd. for C<sub>18</sub>H<sub>16</sub>Br<sub>2</sub>F<sub>5</sub> 484.9539; found 484.9547.

#### 4,4'-(1,1,1,6,6-pentafluorohexane-3,4-diyl)dibenzonitrile (**32**)

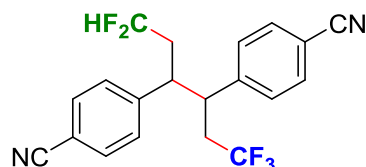

This compound was prepared according to typical reaction procedure of photoredox-catalyzed three-component alkene carbotrifluoromethylation and purified by column chromatography (petroleum ether/ethyl acetate (100:1) as eluant) to offer the product. Pale yellow oil; 20.4 mg, 27%; anti : syn = 0.52 : 1 (the diastereoisomers could not be isolated); <sup>1</sup>H NMR (600 MHz, CDCl<sub>3</sub>): δ [ppm] = 7.74-7.70 (m, 4H), 7.51-7.47 (m, 7.7H), 7.38-7.34 (m, 4H), 6.99-6.97 (t, *J* = 8.6 Hz, 7.7H), 5.55-5.34 (m,



1.9H), 5.33-5.14 (m, 1H), 3.31-3.28 (m, 1.9H), 3.25-3.20 (m, 1.9H), 3.18-3.16 (m, 1H), 3.10-3.06 (m, 1H), 2.71-2.63 (m, 1.9H), 2.52-2.44 (m, 1H), 2.43-2.37 (m, 1.9H), 2.34-2.27 (m, 1H), 2.23-2.14 (m, 1.9H), 2.11-2.05 (m, 1H), 2.00-1.87 (m, 1.9H), 1.81-1.75 (m, 1H);  $^{13}\text{C}$  NMR (150 MHz,  $\text{CDCl}_3$ ):  $\delta$  [ppm] = 145.4, 145.3, 144.3, 144.0, 133.4, 133.1, 132.5, 132.3, 129.34, 129.30, 128.83, 128.82, 127.8 (q,  $J_{\text{CF}} = 268.4$  Hz), 118.3, 118.1, 115.4, 115.3, 115.2 (t,  $J_{\text{CF}} = 230.8$  Hz), 112.5, 112.2, 111.9, 111.7, 45.8, 45.7, 44.93, 44.88, 38.2 (t,  $J_{\text{CF}} = 22.3$  Hz), 38.1 (q,  $J_{\text{CF}} = 27.2$  Hz), 37.7 (q,  $J_{\text{CF}} = 27.5$  Hz);  $^{19}\text{F}$  NMR (564 MHz,  $\text{CDCl}_3$ ):  $\delta$  [ppm] = -63.1 (t,  $J = 10.6$  Hz, 6F), -63.4 (t,  $J = 10.6$  Hz, 3F), -114.5--116.2 (m, 2F), -117.3--118.2 (m, 4F); HRMS (ESI)  $m/z$ :  $[\text{M}+\text{H}]^+$  calcd. for  $\text{C}_{20}\text{H}_{16}\text{F}_5\text{N}_2$  379.1234; found 379.1227.

3,3'-(1,1,1,6,6,6-hexafluorohexane-3,4-diyl)bis(13-methyl-6,7,8,9,11,12,13,14,15,16-decahydro-17H-cyclopenta[a]phenanthren-17-one) (**34**)

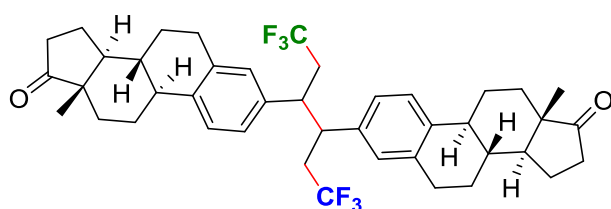

This compound was prepared according to typical reaction procedure of photoredox-catalyzed three-component alkene carbotrifluoromethylation and purified by column chromatography (petroleum ether/ethyl acetate (20:1) as eluant) to offer the product. Pale yellow oil; 74.0 mg, 53%; anti : syn = 1 : 1 (the diastereoisomers could not be isolated);  $^1\text{H}$  NMR (600 MHz,  $\text{CDCl}_3$ ):  $\delta$  [ppm] = 7.16-7.15 (d,  $J = 8.0$  Hz, 2H), 7.14-7.12 (d,  $J = 8.1$  Hz, 2H), 6.67-6.66 (d,  $J = 8.0$  Hz, 2H), 6.57-6.56 (d,  $J = 8.1$  Hz, 2H), 6.54 (s, 2H), 6.38 (s, 2H), 3.30-3.28 (m, 4H), 2.93-2.78 (m, 8H), 2.53-2.46 (m, 8H), 2.41-2.38 (m, 5H), 2.30-2.25 (m, 9H), 2.18-2.12 (m, 3H), 2.08-2.05 (m, 4H), 1.98-1.95 (m, 4H), 1.65-1.58 (m, 12H), 1.54-1.46 (m, 14H), 0.923 (s, 6H), 0.921 (s, 6H);  $^{13}\text{C}$  NMR (150 MHz,  $\text{CDCl}_3$ ):  $\delta$  [ppm] = 221.1, 138.9, 138.8, 135.8, 135.7, 135.2, 135.1, 130.4, 130.3, 127.1, 127.0, 126.8 (q,  $J_{\text{CF}} = 275.8$  Hz), 124.72, 124.69, 50.60, 50.57, 48.1, 44.4, 44.3, 42.9, 42.8, 38.2, 37.3 (q,  $J_{\text{CF}} = 27.3$  Hz), 37.2 (q,  $J_{\text{CF}} = 27.6$  Hz), 36.0, 31.7, 29.5, 26.64, 26.62, 25.8, 25.7, 21.7, 14.0;  $^{19}\text{F}$  NMR (564 MHz,  $\text{CDCl}_3$ ):  $\delta$  [ppm] = -63.1 (m, 12F).<sup>[1]</sup>

bis((1R,2S,5R)-2-isopropyl-5-methylcyclohexyl) 4,4'-(1,1,1,6,6,6-hexafluorohexane-3,4-diyl)dibenzoate (**35**)

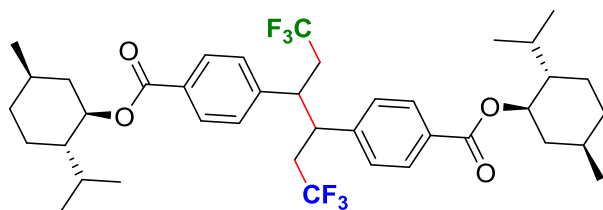

This compound was prepared according to typical reaction procedure of photoredox-catalyzed three-component alkene carbotrifluoromethylation and purified

by column chromatography (petroleum ether/ethyl acetate (30:1) as eluant) to offer the product. Colorless oil; 90.9 mg, 64%; syn (one of the diastereoisomers could be isolated);  $^1\text{H}$  NMR (600 MHz,  $\text{CDCl}_3$ ):  $\delta$  [ppm] = 7.90-7.88 (t,  $J$  = 8.1 Hz, 4H), 6.91-6.88 (d,  $J$  = 8.2 Hz, 4H), 4.93-4.88 (m, 2H), 3.45-3.40 (m, 2H), 2.63-2.54 (m, 2H), 2.43-2.36 (m, 2H), 2.12-2.09 (m, 2H), 1.96-1.93 (m, 2H), 1.73-1.71 (d,  $J$  = 12.1 Hz, 4H), 1.57-1.51 (m, 4H), 1.15-1.04 (m, 4H), 0.92-0.90 (m, 14H), 0.79-0.78 (d,  $J$  = 6.9 Hz, 6H);  $^{13}\text{C}$  NMR (150 MHz,  $\text{CDCl}_3$ ):  $\delta$  [ppm] = 165.8, 142.8, 130.3, 129.5, 129.0, 126.3 (q,  $J_{\text{CF}}$  = 274.9 Hz), 75.1, 47.3, 43.8 (q,  $J_{\text{CF}}$  = 10.9 Hz), 41.0, 37.6 (q,  $J_{\text{CF}}$  = 27.4 Hz), 34.4, 31.5, 26.5, 23.6, 22.1, 20.9, 16.5;  $^{19}\text{F}$  NMR (564 MHz,  $\text{CDCl}_3$ ):  $\delta$  [ppm] = -63.2 (t,  $J$  = 10.6 Hz, 6F); HRMS (ESI)  $m/z$ :  $[\text{M}+\text{H}]^+$  calcd. for  $\text{C}_{40}\text{H}_{53}\text{F}_6\text{O}_4$  711.3848; found 711.3858.

#### 4-(1,1,1,6,6,6-hexafluoro-4-(p-tolyl)hexan-3-yl)benzonitrile (**36**)

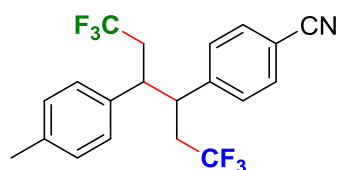

This compound was prepared according to typical reaction procedure of photoredox-catalyzed three-component alkene carbotrifluoromethylation and purified by column chromatography (petroleum ether/ethyl acetate (100:1) as eluant) to offer the product. Colorless oil; 25% (determined by  $^{19}\text{F}$  NMR, this compound could not be effectively isolated from the reaction mixture); anti (one of the diastereoisomers could be isolated);  $^1\text{H}$  NMR (600 MHz,  $\text{CDCl}_3$ ):  $\delta$  [ppm] = 7.70-7.69 (d,  $J$  = 8.0 Hz, 2H), 7.36-7.35 (d,  $J$  = 8.1 Hz, 2H), 7.20-7.18 (d,  $J$  = 8.0 Hz, 2H), 7.08-7.07 (d,  $J$  = 8.1 Hz, 2H), 3.14-3.11 (m, 1H), 3.05-3.01 (m, 1H), 2.36 (m, 3H), 2.31-2.25 (m, 1H), 2.22-2.14 (m, 2H), 2.04-1.99 (m, 1H);  $^{13}\text{C}$  NMR (150 MHz,  $\text{CDCl}_3$ ):  $\delta$  [ppm] = 146.3, 137.9, 136.4, 133.0, 130.1, 128.9, 127.7, 126.2 (q,  $J_{\text{CF}}$  = 264.8 Hz), 118.5, 111.9, 46.0, 45.2, 38.2 (q,  $J_{\text{CF}}$  = 27.3 Hz), 38.0 (q,  $J_{\text{CF}}$  = 27.0 Hz), 21.2;  $^{19}\text{F}$  NMR (564 MHz,  $\text{CDCl}_3$ ):  $\delta$  [ppm] = -63.3 (t,  $J$  = 10.5 Hz, 3F), -63.5 (t,  $J$  = 10.6 Hz, 3F); HRMS (ESI)  $m/z$ :  $[\text{M}+\text{H}]^+$  calcd. for  $\text{C}_{20}\text{H}_{18}\text{F}_6\text{N}$  386.1343; found 386.1349.

#### (E)-1-ferrocenyl-3,3,3-trifluoroprop-1-ene (**38**)

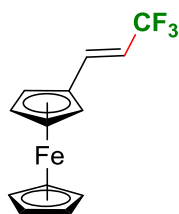

This compound was prepared according to typical reaction procedure of photoredox-catalyzed three-component alkene carbotrifluoromethylation and purified by column chromatography (petroleum ether/ethyl acetate (80:1) as eluant) to offer the product. Orange solid; 24.7 mg, 22%;  $^1\text{H}$  NMR (600 MHz,  $\text{CDCl}_3$ ):  $\delta$  [ppm] = 6.98-6.95 (m, 1H), 5.82-5.76 (m, 1H), 4.42-4.41 (t,  $J$  = 1.8 Hz, 2H), 4.352-4.346 (t,  $J$

= 1.7 Hz, 2H), 4.15 (m, 5H);  $^{13}\text{C}$  NMR (150 MHz,  $\text{CDCl}_3$ ):  $\delta$  [ppm] = 137.3 (q,  $J_{\text{CF}} = 6.8$  Hz), 123.9 (q,  $J_{\text{CF}} = 276.5$  Hz), 112.5 (q,  $J_{\text{CF}} = 33.2$  Hz), 78.2, 77.3, 77.1, 76.9, 70.4, 69.6, 68.0;  $^{19}\text{F}$  NMR (564 MHz,  $\text{CDCl}_3$ ):  $\delta$  [ppm] = -62.7 (d,  $J = 6.8$  Hz, 3F); HRMS (ESI)  $m/z$ :  $[\text{M}+\text{H}]^+$  calcd. for  $\text{C}_{13}\text{H}_{12}\text{F}_3\text{Fe}$  281.0241; found 281.0235.

#### 1-ferrocenyl-3,3,3-trifluoropropyl 2-iodobenzoate (**39**)

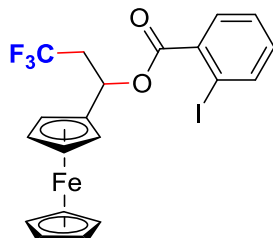

This compound was prepared according to typical reaction procedure of photoredox-catalyzed three-component alkene carbotrifluoromethylation and purified by column chromatography (petroleum ether/ethyl acetate (8:1) as eluant) to offer the product. Orange solid; 12.7 mg, 6%;  $^1\text{H}$  NMR (600 MHz,  $\text{CDCl}_3$ ):  $\delta$  [ppm] = 7.99-7.97 (d,  $J = 7.9$  Hz, 1H), 7.77-7.76 (dd,  $J = 7.8, 1.3$  Hz, 1H), 7.39-7.37 (t,  $J = 7.6$  Hz, 1H), 7.15-7.12 (td,  $J = 7.9, 1.5$  Hz, 1H), 6.43-6.40 (dd,  $J = 7.9, 4.1$  Hz, 1H), 4.47-4.46 (d,  $J = 1.3$  Hz, 1H), 4.22-4.18 (m, 8H), 2.94-2.88 (m, 2H);  $^{13}\text{C}$  NMR (150 MHz,  $\text{CDCl}_3$ ):  $\delta$  [ppm] = 165.3, 141.5, 134.5, 132.9, 130.9, 128.0, 94.5, 85.3, 69.0, 68.9, 68.8, 68.7, 67.3, 67.2, 66.0, 38.9 (q,  $J_{\text{CF}} = 28.1$  Hz);  $^{19}\text{F}$  NMR (564 MHz,  $\text{CDCl}_3$ ):  $\delta$  [ppm] = -64.2 (t,  $J = 10.5$  Hz, 3F); HRMS (ESI)  $m/z$ :  $[\text{M}+\text{H}]^+$  calcd. for  $\text{C}_{20}\text{H}_{17}\text{F}_3\text{FeIO}_2$  528.9575; found 528.9574.

#### Reference:

[1] D. Louvel, A. Souibgui, A. Taponard, J. Rouillon, M. b. Mosbah, Y. Moussaoui, G. Pilet, L. Khrouz, C. Monnereau, J. C. Vantourout, A. Tlili, *Adv. Synth. Catal.*, 2022, **364**, 139-148.

## 11. NMR Spectra of products

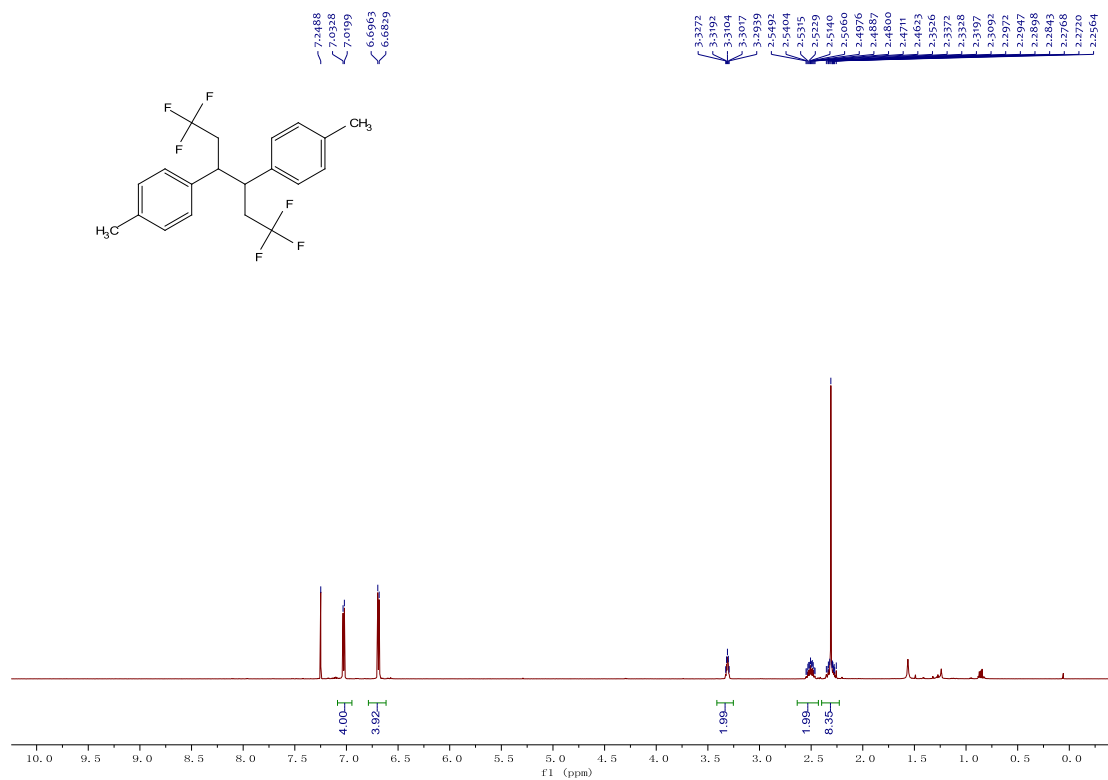

<sup>1</sup>H NMR spectrum (600 MHz, CDCl<sub>3</sub>) of **4** (syn)

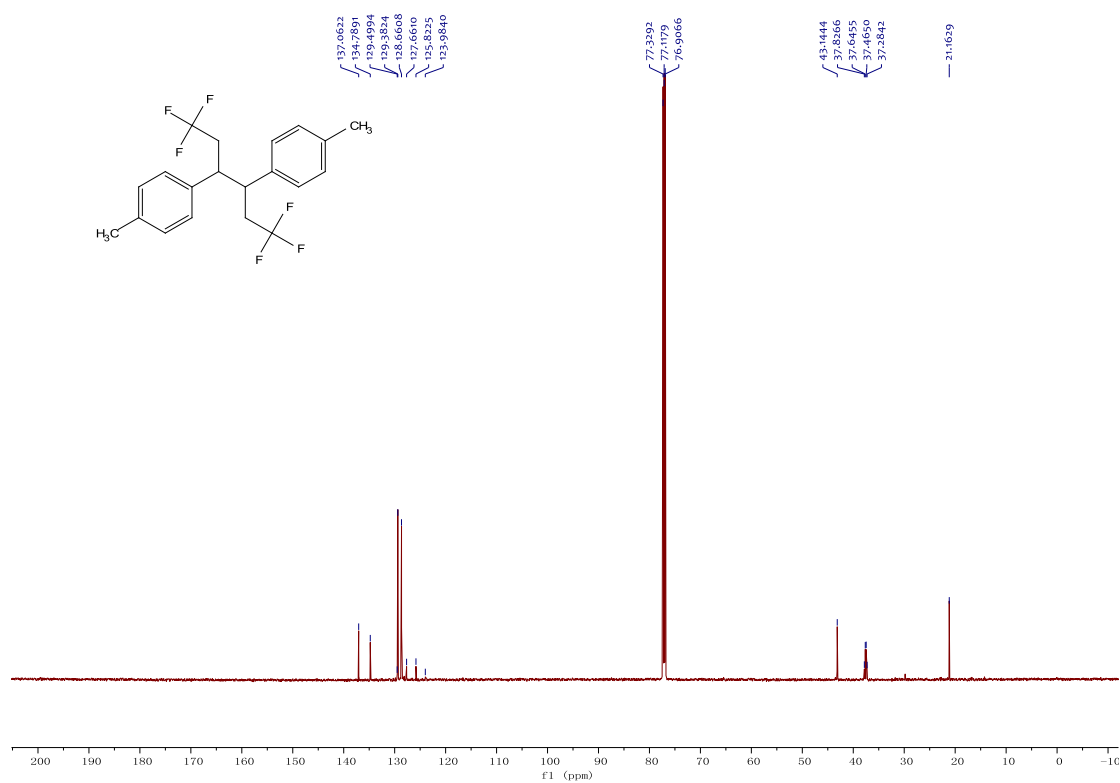

<sup>13</sup>C NMR spectrum (150 MHz, CDCl<sub>3</sub>) of **4** (syn)

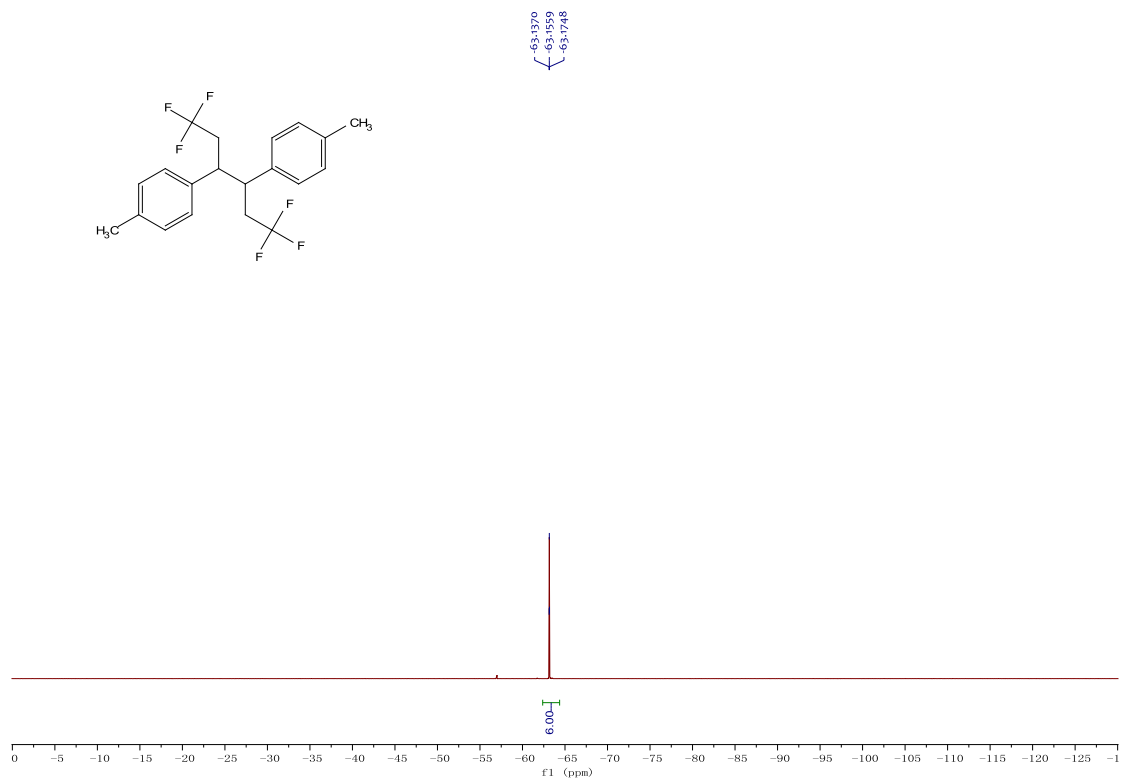

$^{19}\text{F}$  NMR spectrum (564 MHz,  $\text{CDCl}_3$ ) of 4 (syn)

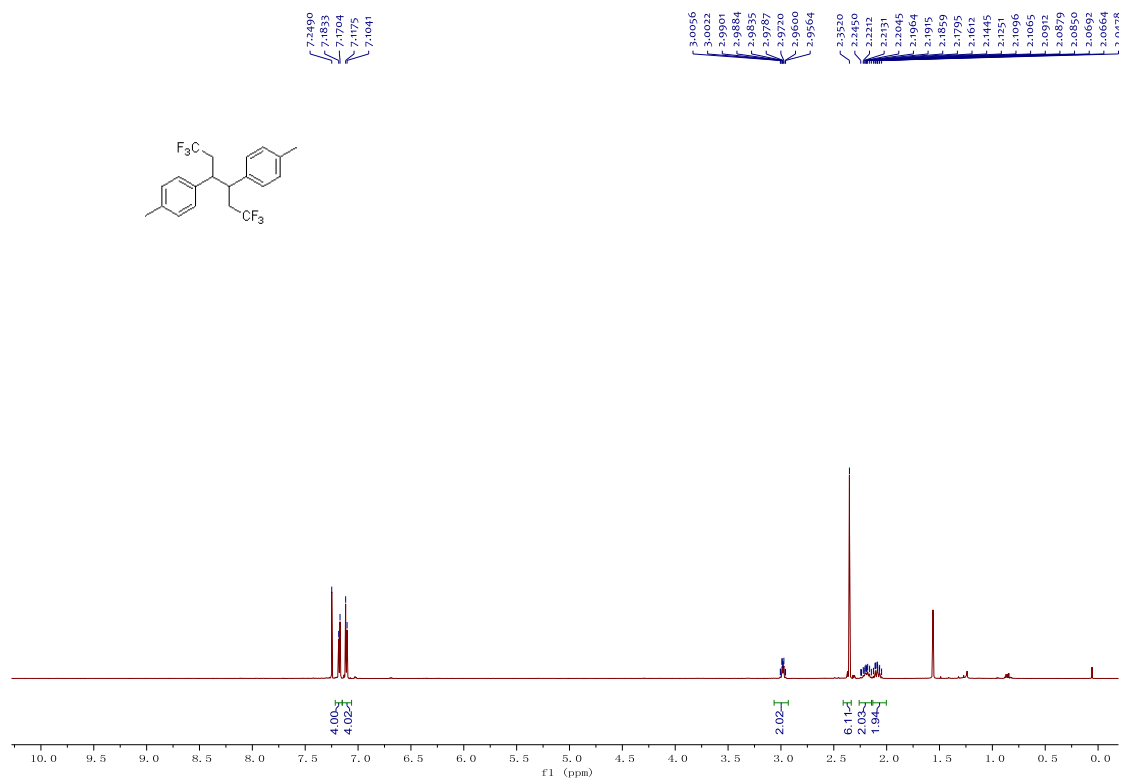

$^1\text{H}$  NMR spectrum (600 MHz,  $\text{CDCl}_3$ ) of 4 (anti)

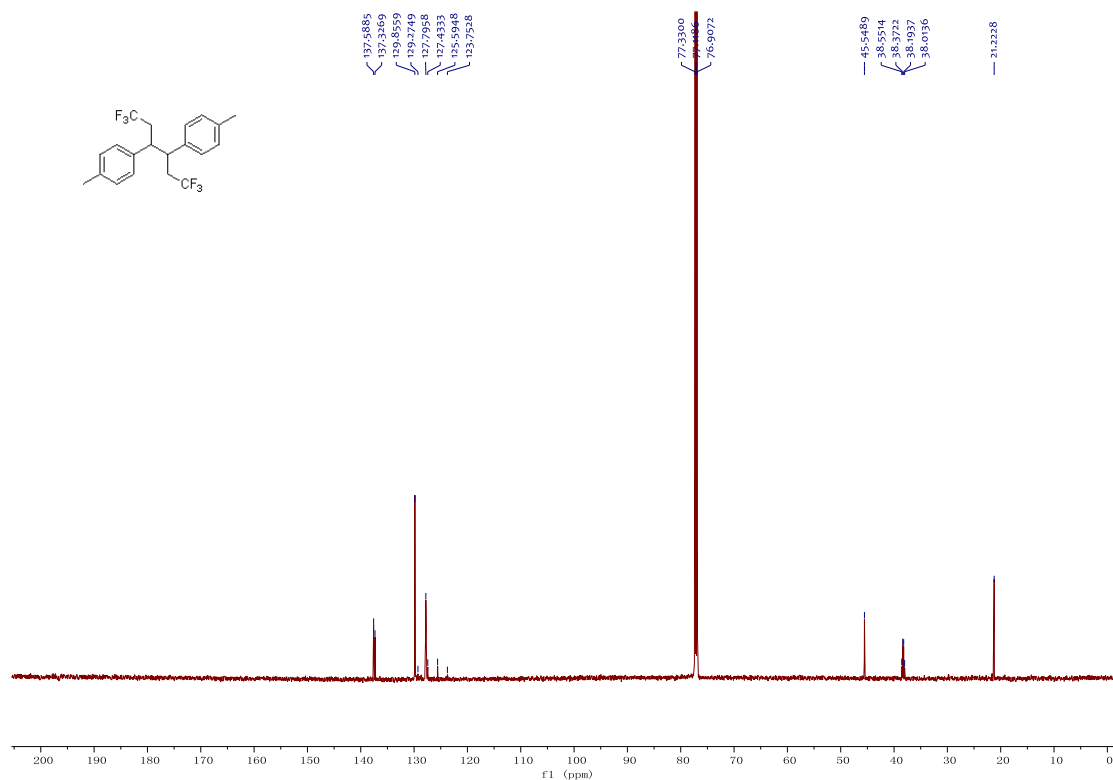

$^{13}\text{C}$  NMR spectrum (150 MHz,  $\text{CDCl}_3$ ) of **4** (anti)

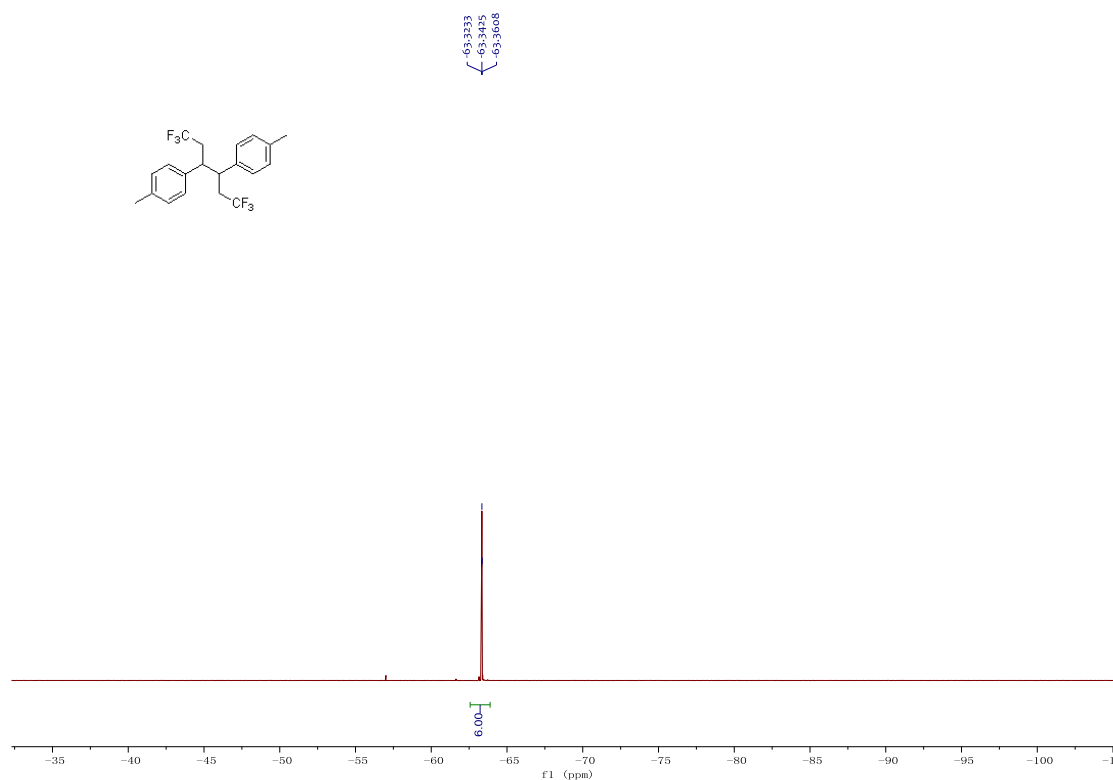

$^{19}\text{F}$  NMR spectrum (564 MHz,  $\text{CDCl}_3$ ) of **4** (anti)

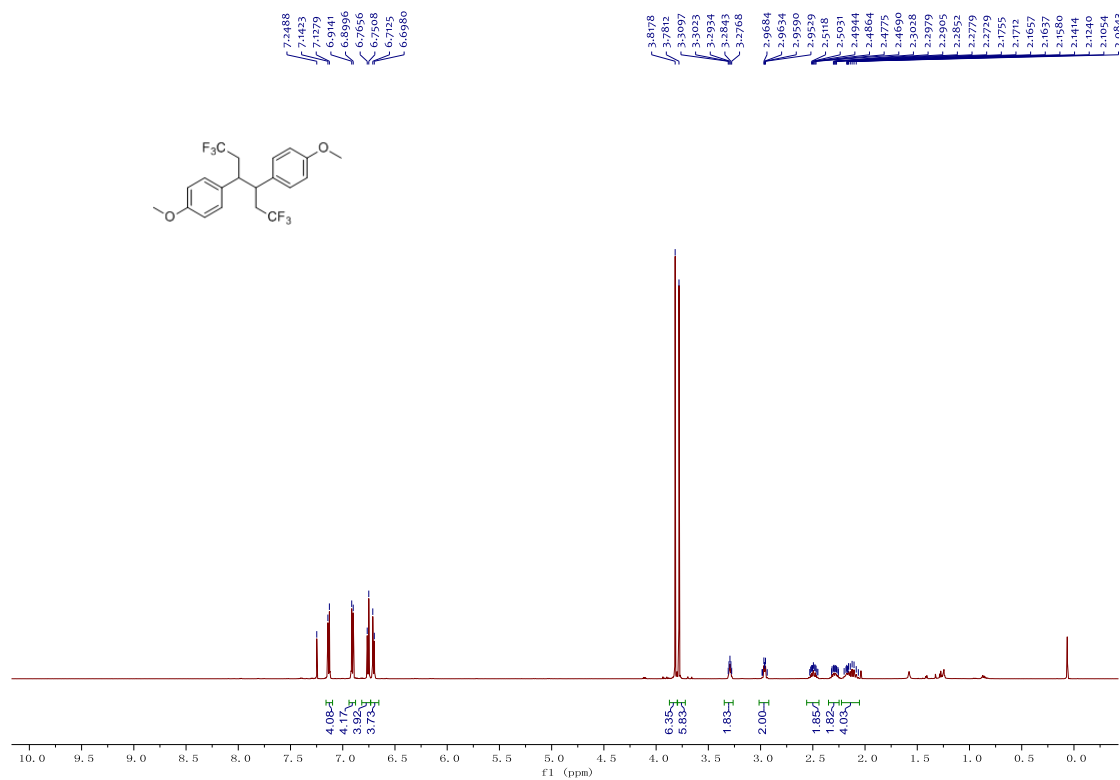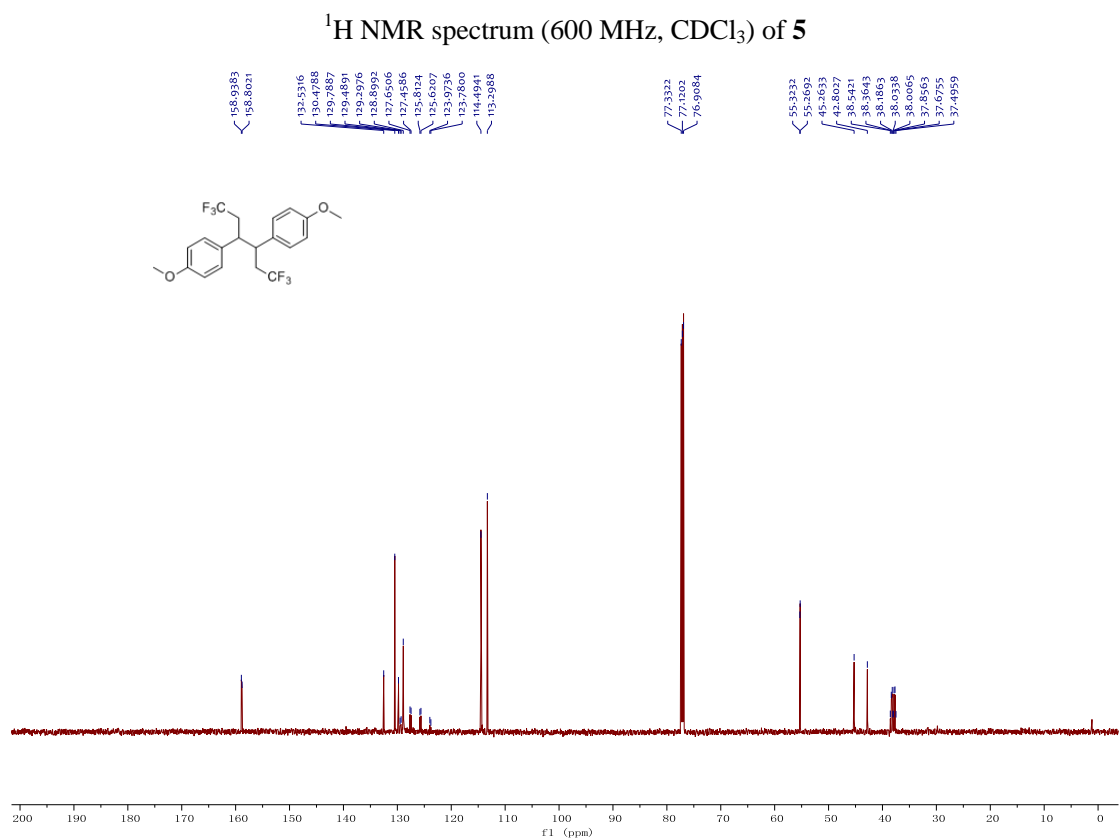

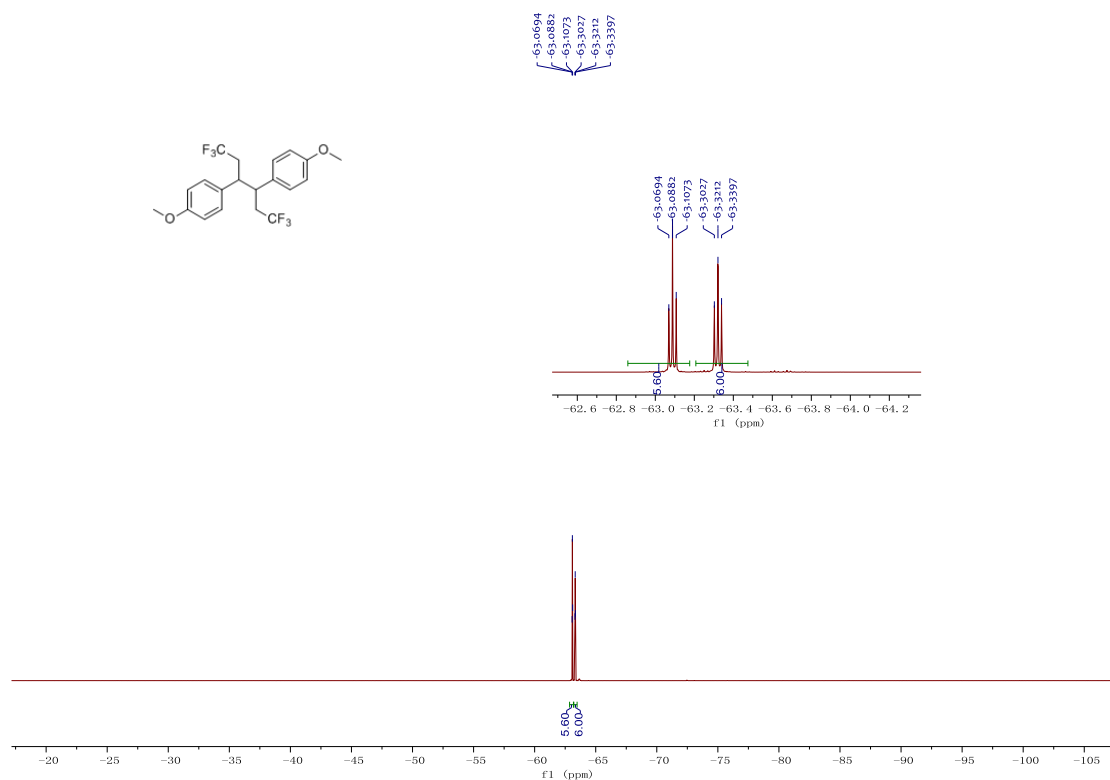

$^{19}\text{F}$  NMR spectrum (564 MHz,  $\text{CDCl}_3$ ) of 5

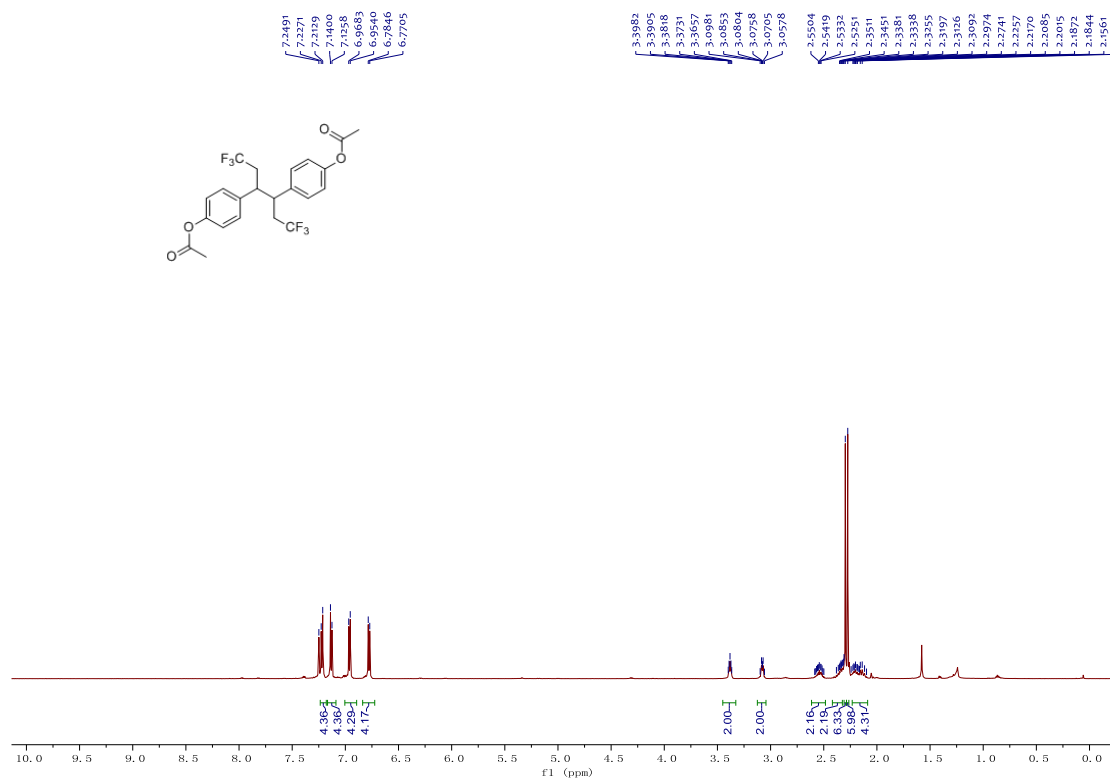

$^1\text{H}$  NMR spectrum (600 MHz,  $\text{CDCl}_3$ ) of 6



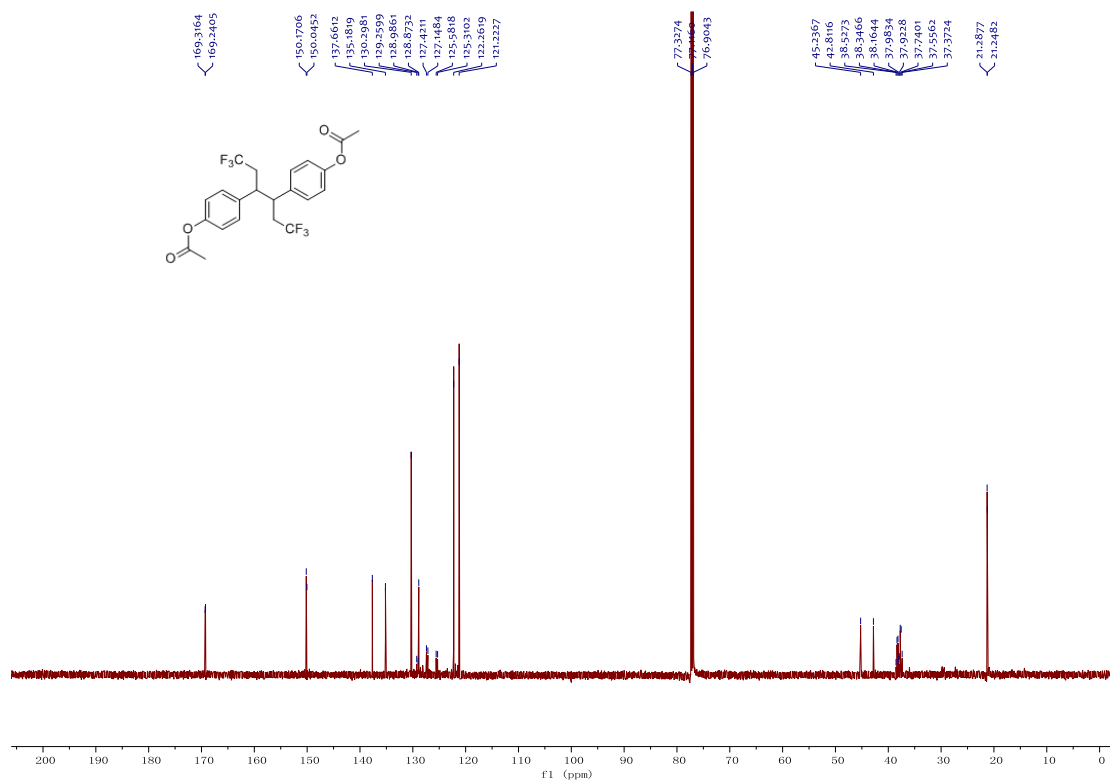

<sup>13</sup>C NMR spectrum (150 MHz, CDCl<sub>3</sub>) of 6

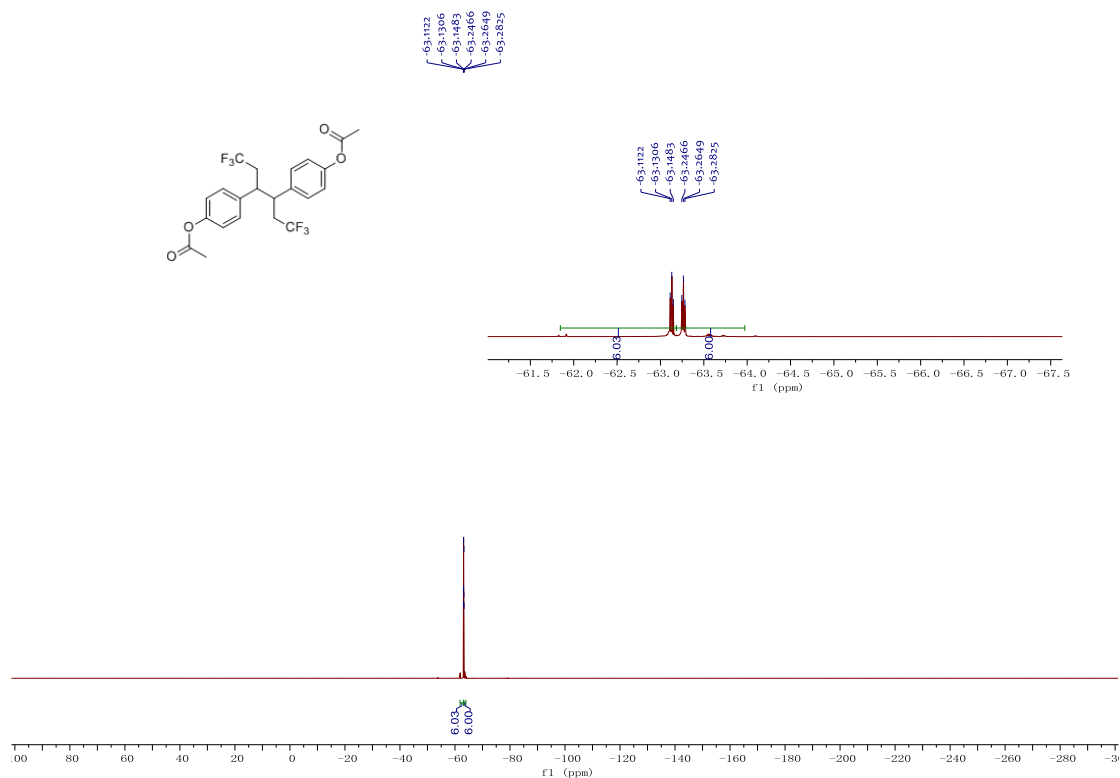

<sup>19</sup>F NMR spectrum (564 MHz, CDCl<sub>3</sub>) of 6

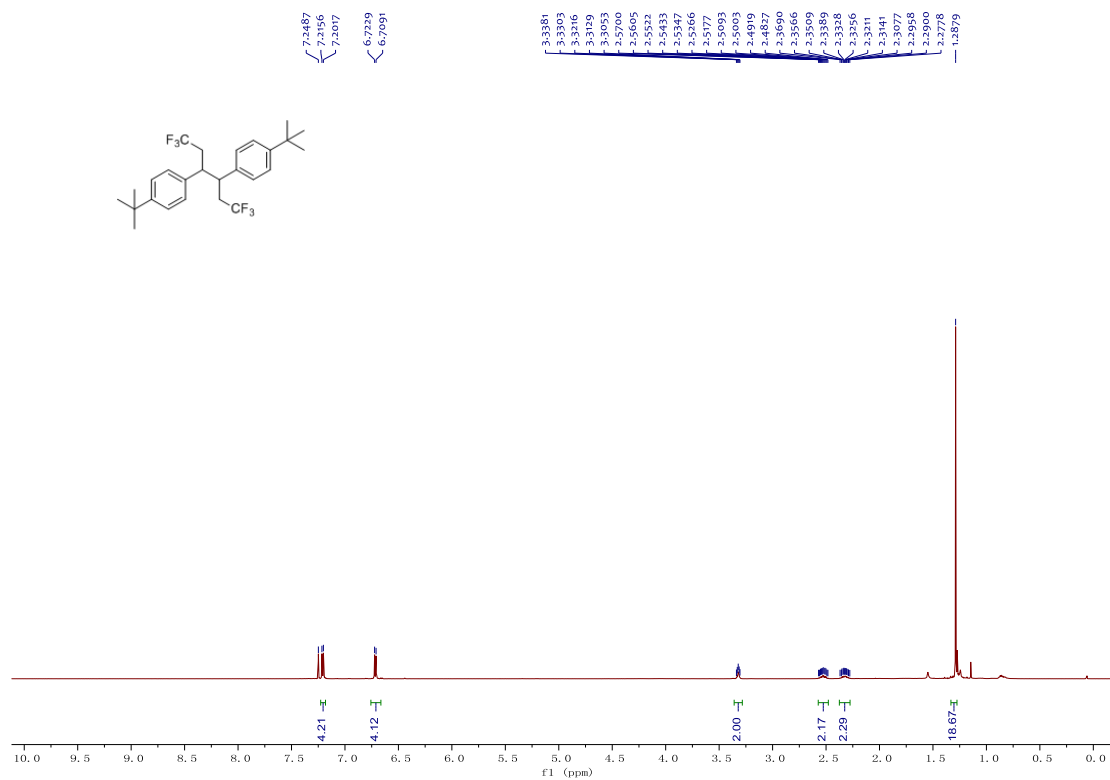

<sup>1</sup>H NMR spectrum (600 MHz, CDCl<sub>3</sub>) of 7 (syn)

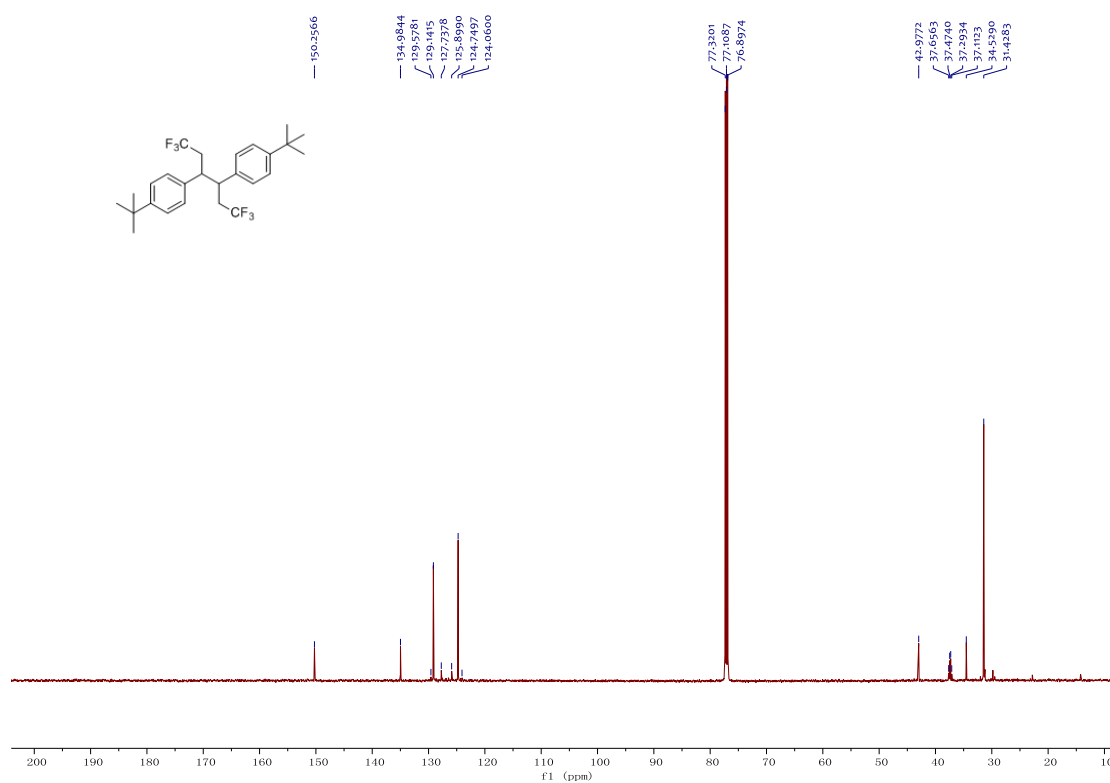

<sup>13</sup>C NMR spectrum (150 MHz, CDCl<sub>3</sub>) of 7 (syn)

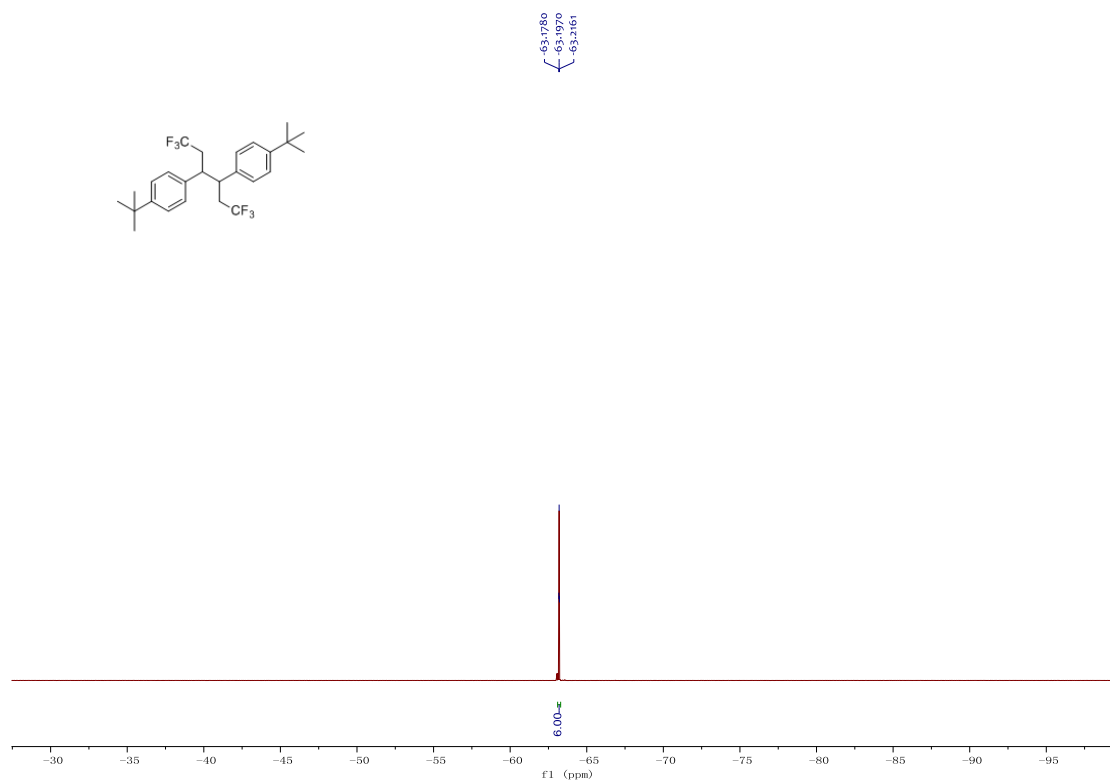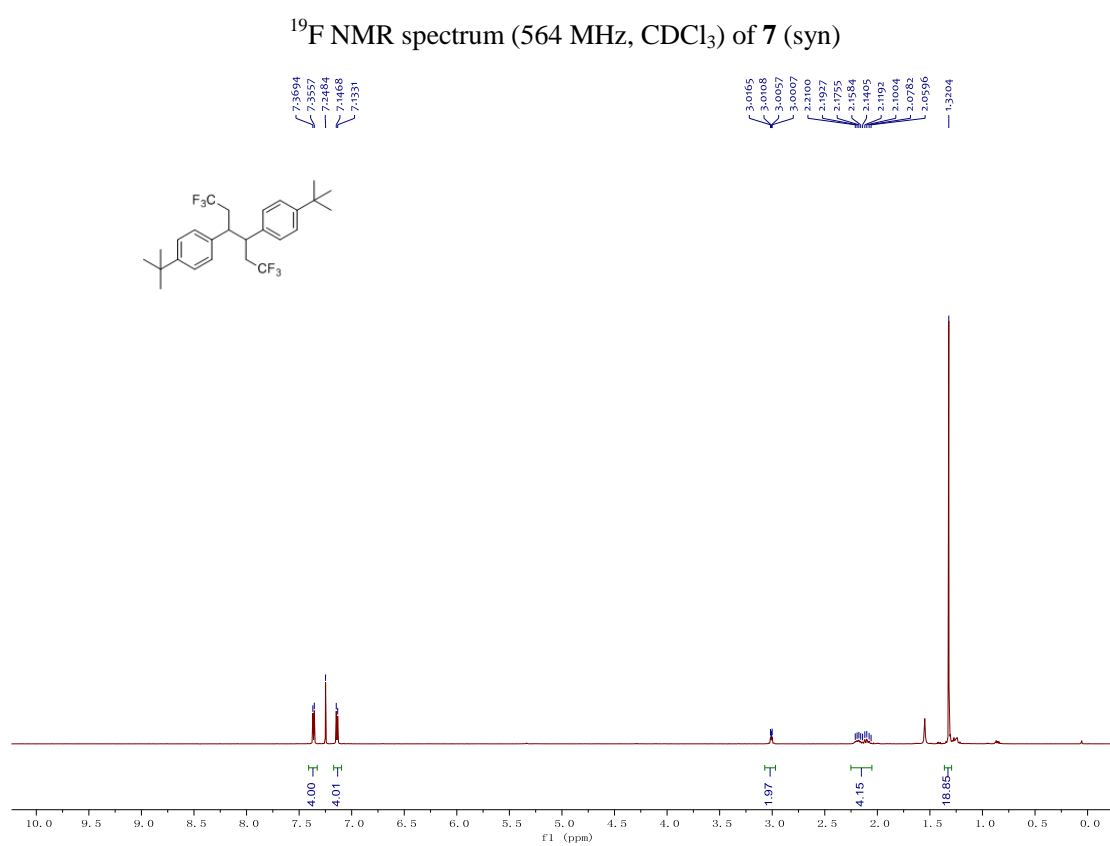

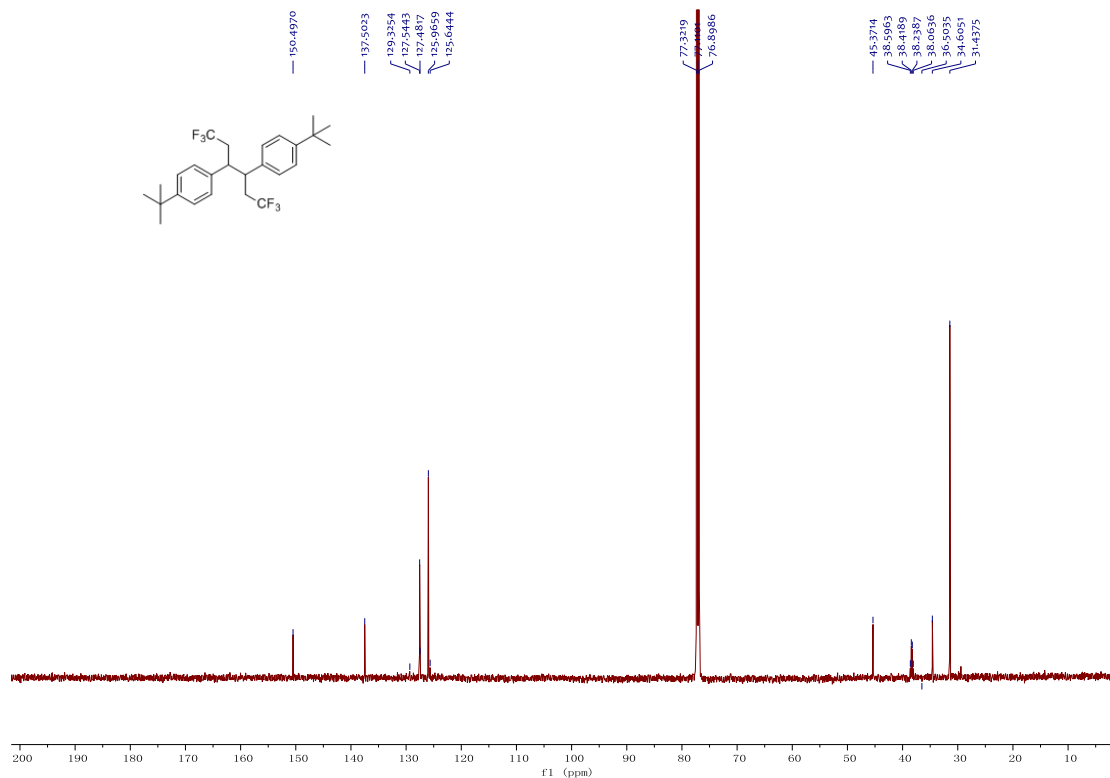

<sup>13</sup>C NMR spectrum (150 MHz, CDCl<sub>3</sub>) of **7** (anti)

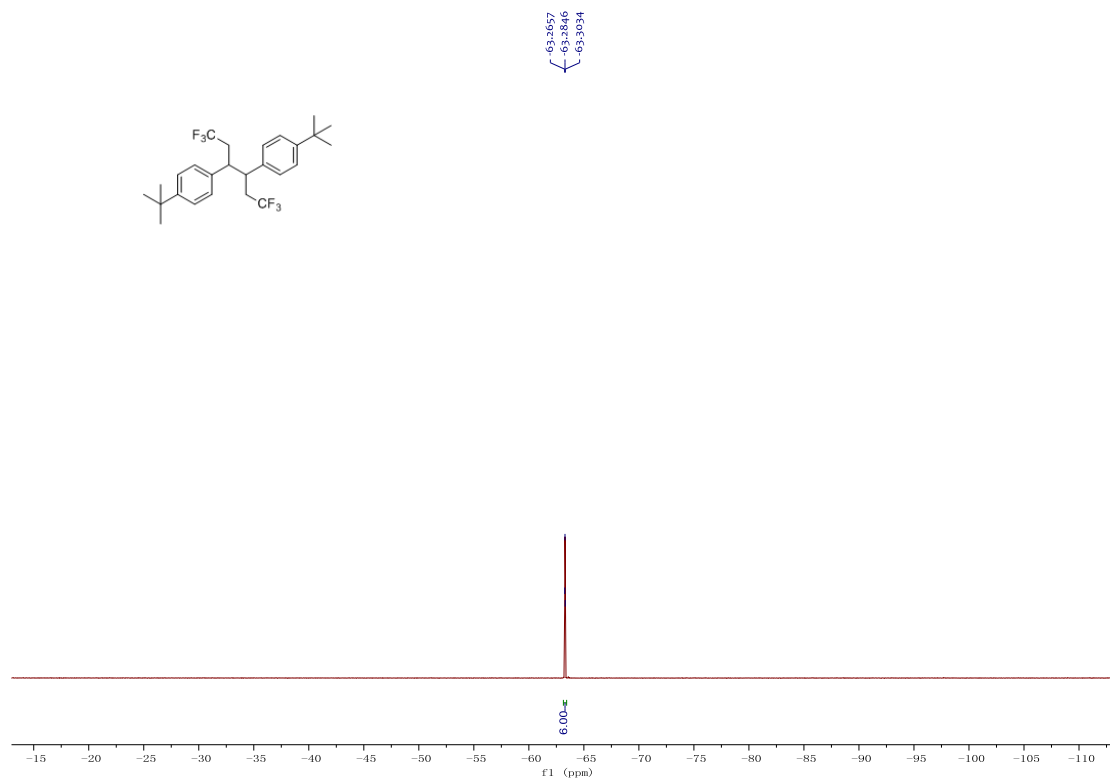

<sup>19</sup>F NMR spectrum (564 MHz, CDCl<sub>3</sub>) of **7** (anti)

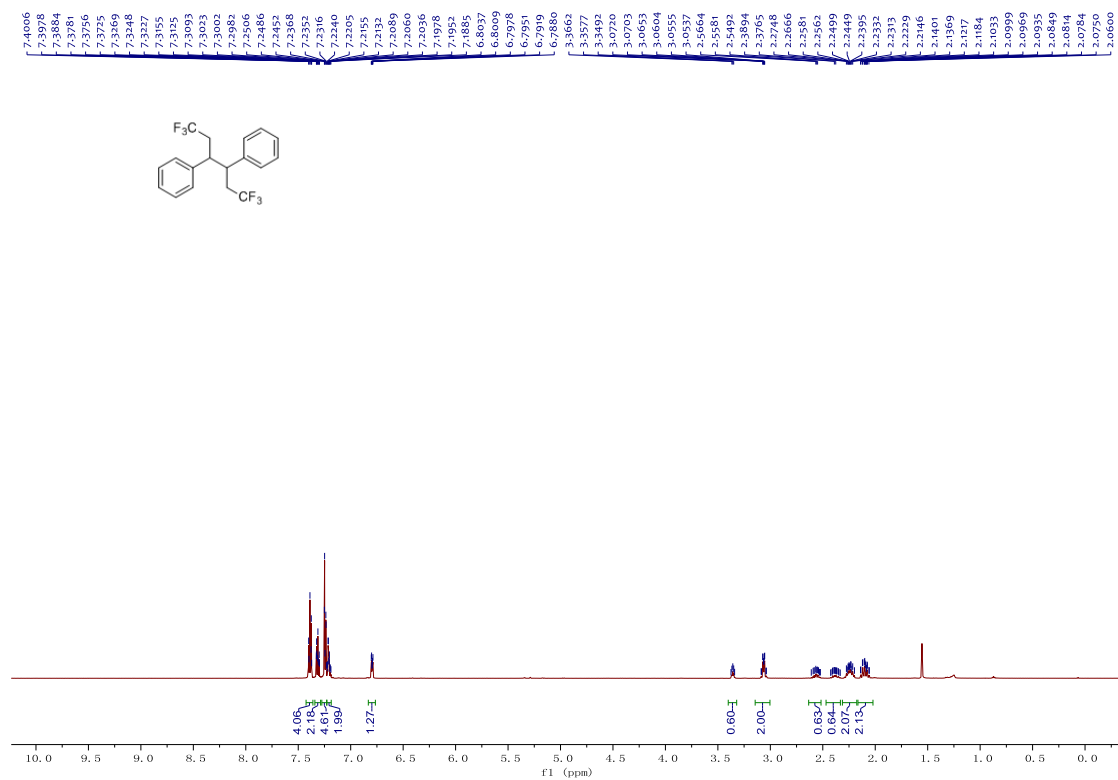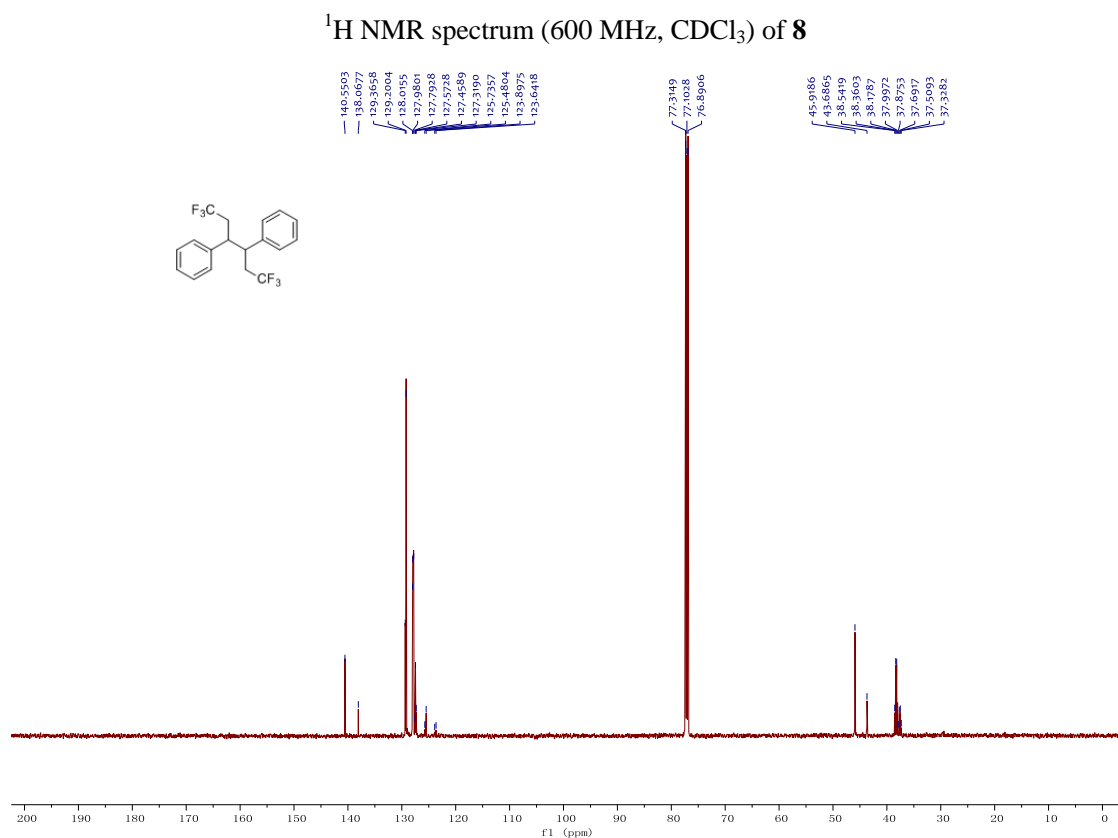

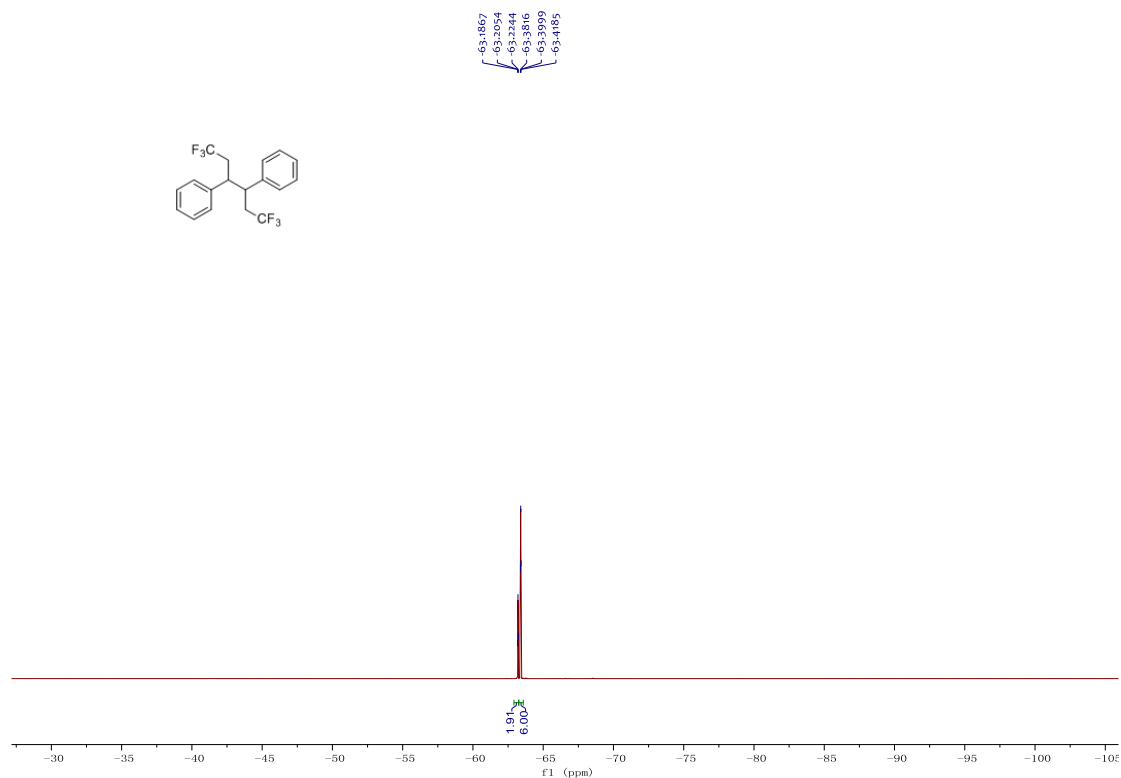

$^{19}\text{F}$  NMR spectrum (564 MHz,  $\text{CDCl}_3$ ) of 8

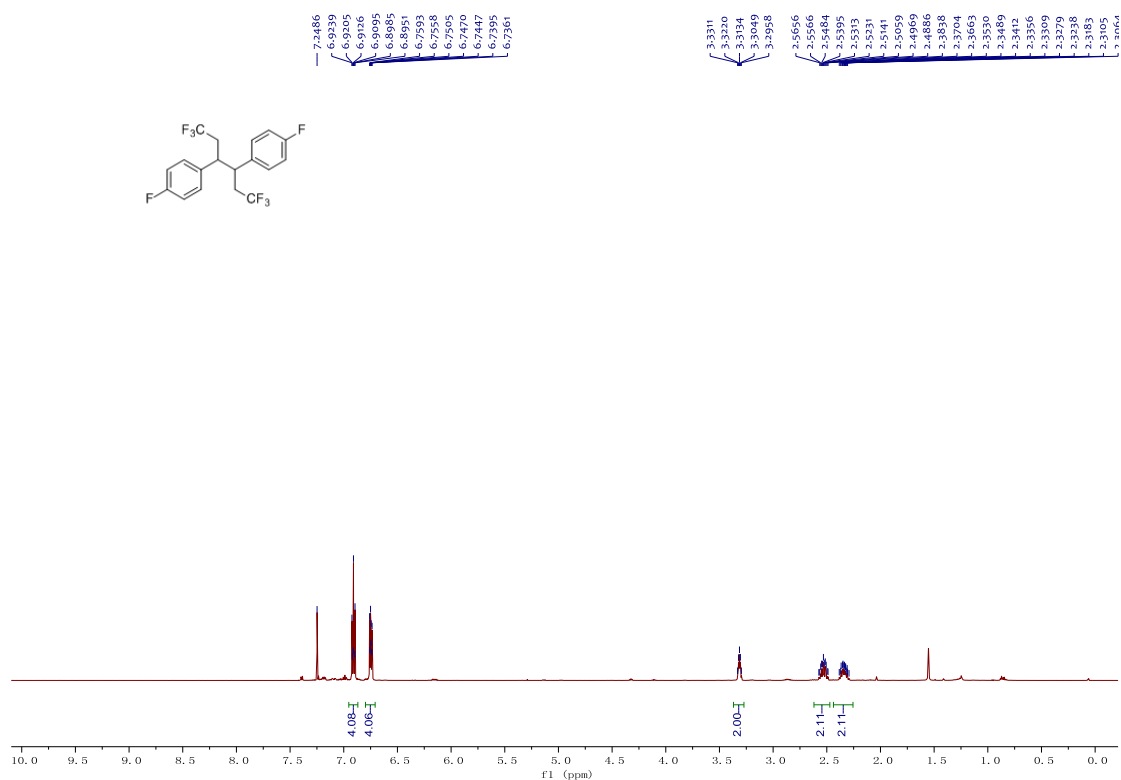

$^1\text{H}$  NMR spectrum (600 MHz,  $\text{CDCl}_3$ ) of 9

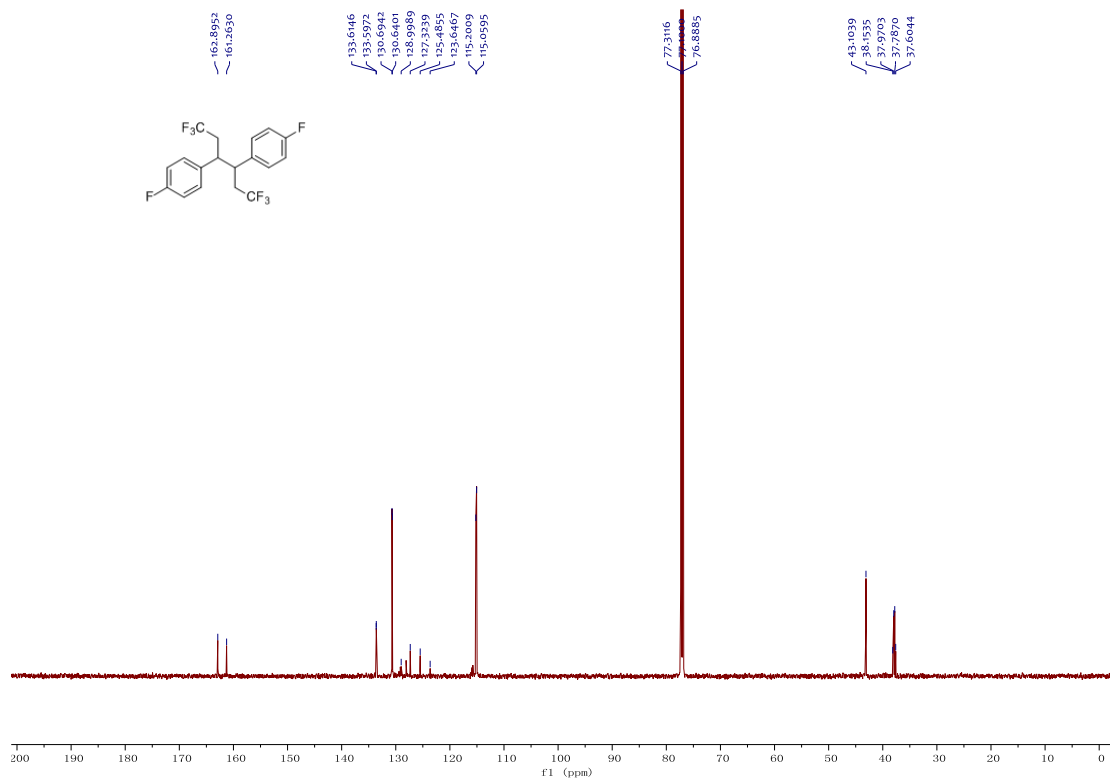

<sup>13</sup>C NMR spectrum (150 MHz, CDCl<sub>3</sub>) of **9**

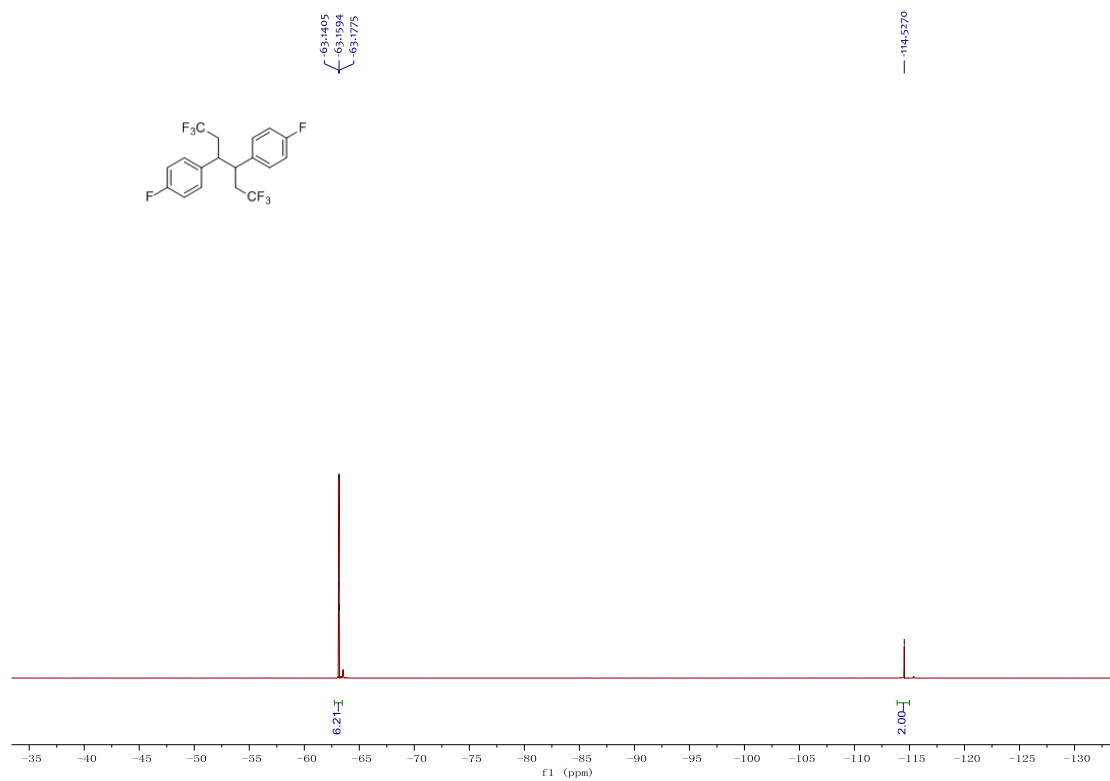

<sup>19</sup>F NMR spectrum (564 MHz, CDCl<sub>3</sub>) of **9**

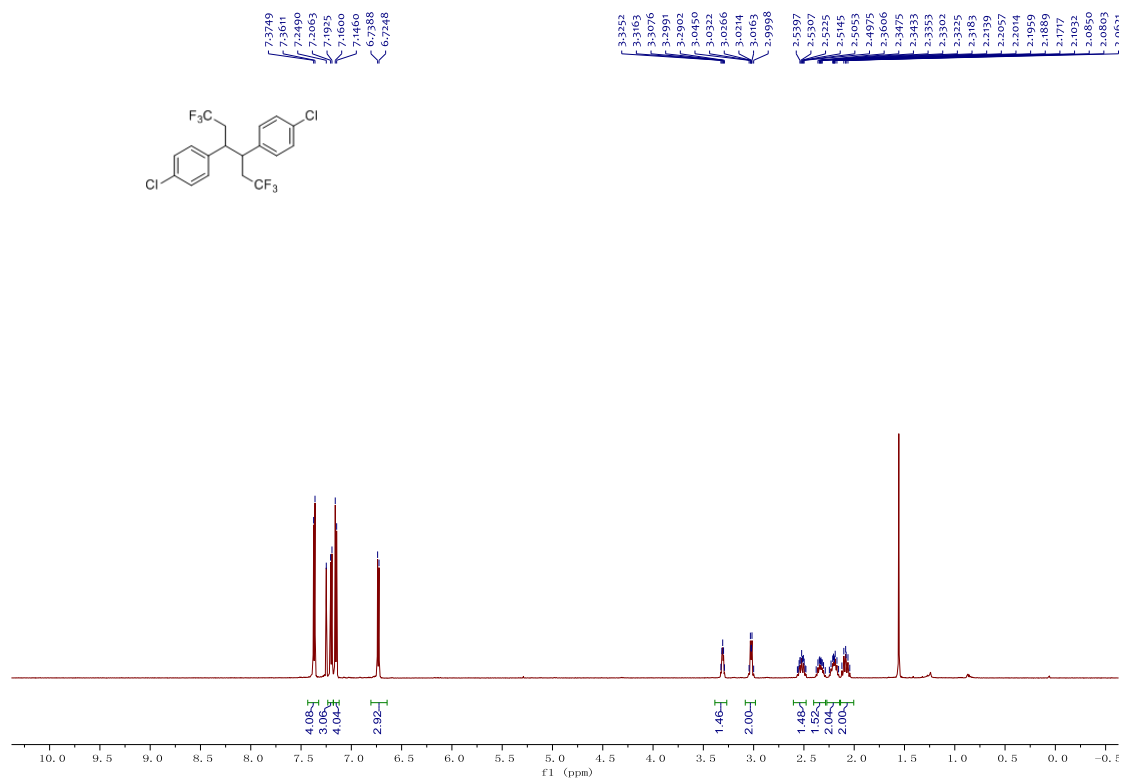

<sup>1</sup>H NMR spectrum (600 MHz, CDCl<sub>3</sub>) of 10

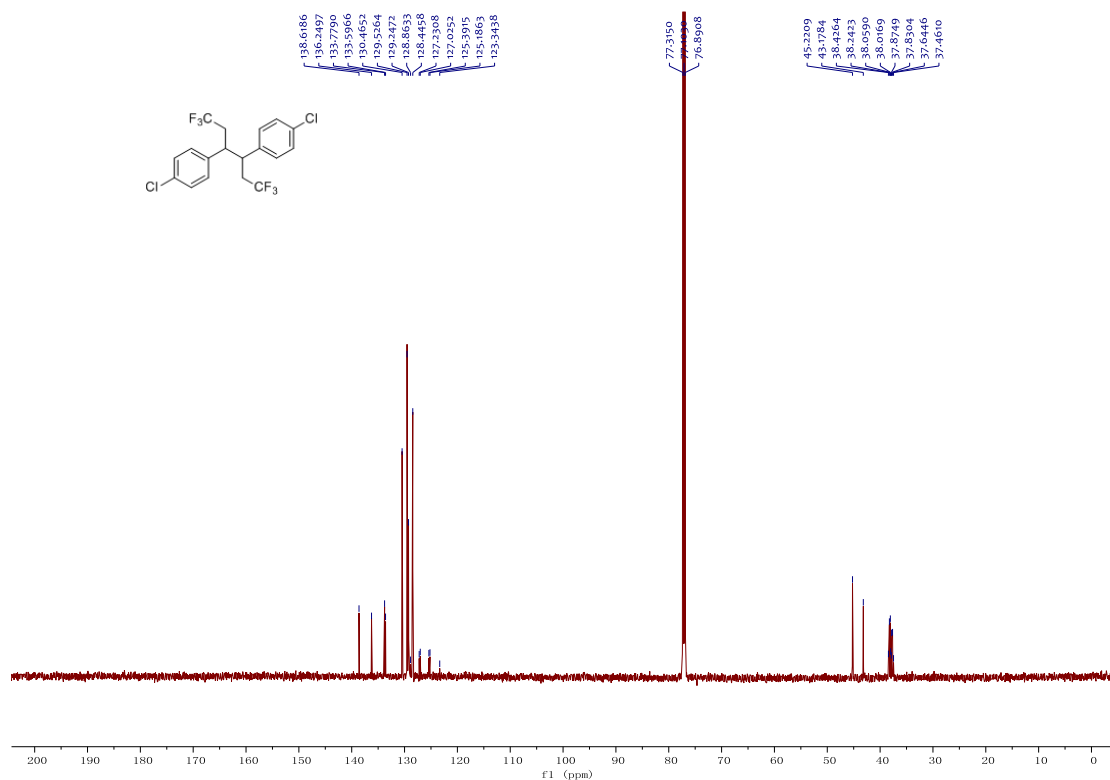

<sup>13</sup>C NMR spectrum (150 MHz, CDCl<sub>3</sub>) of 10



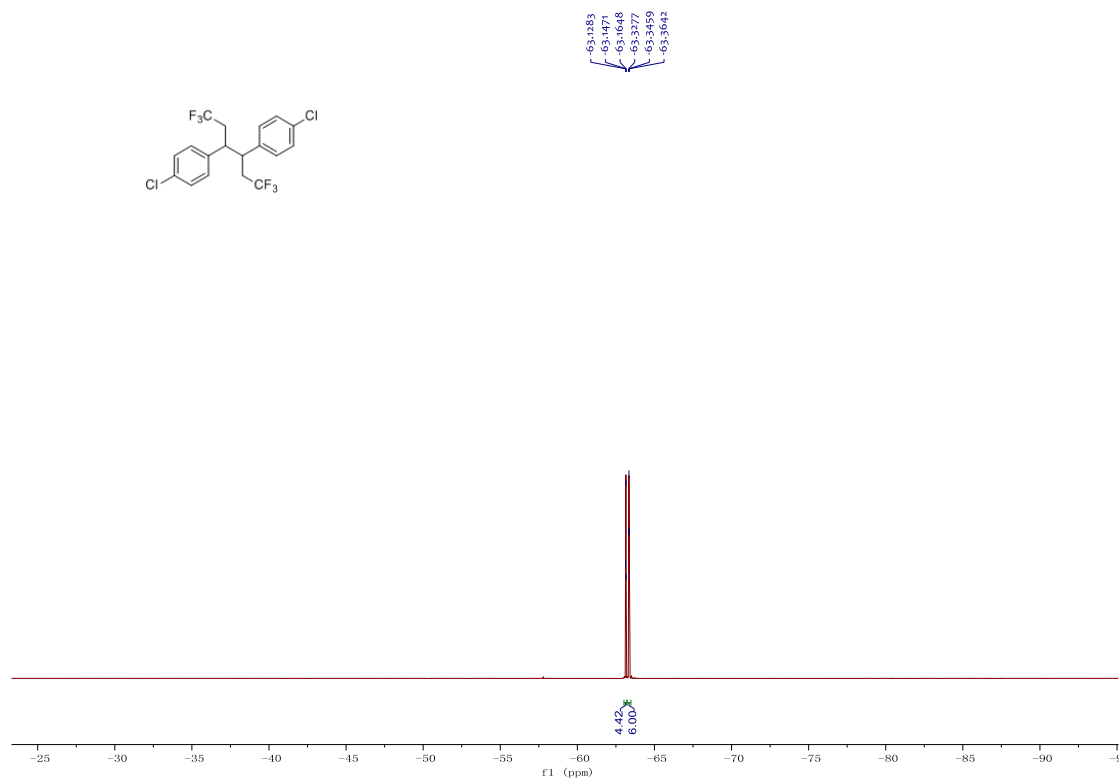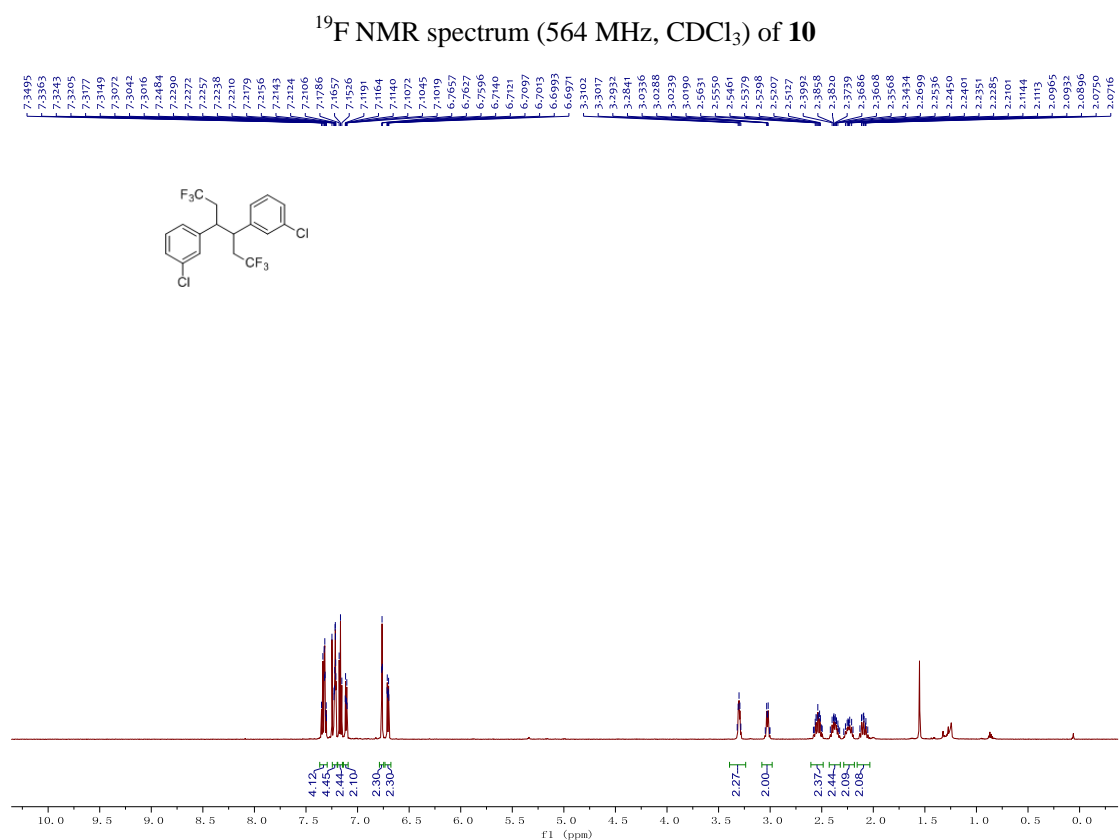

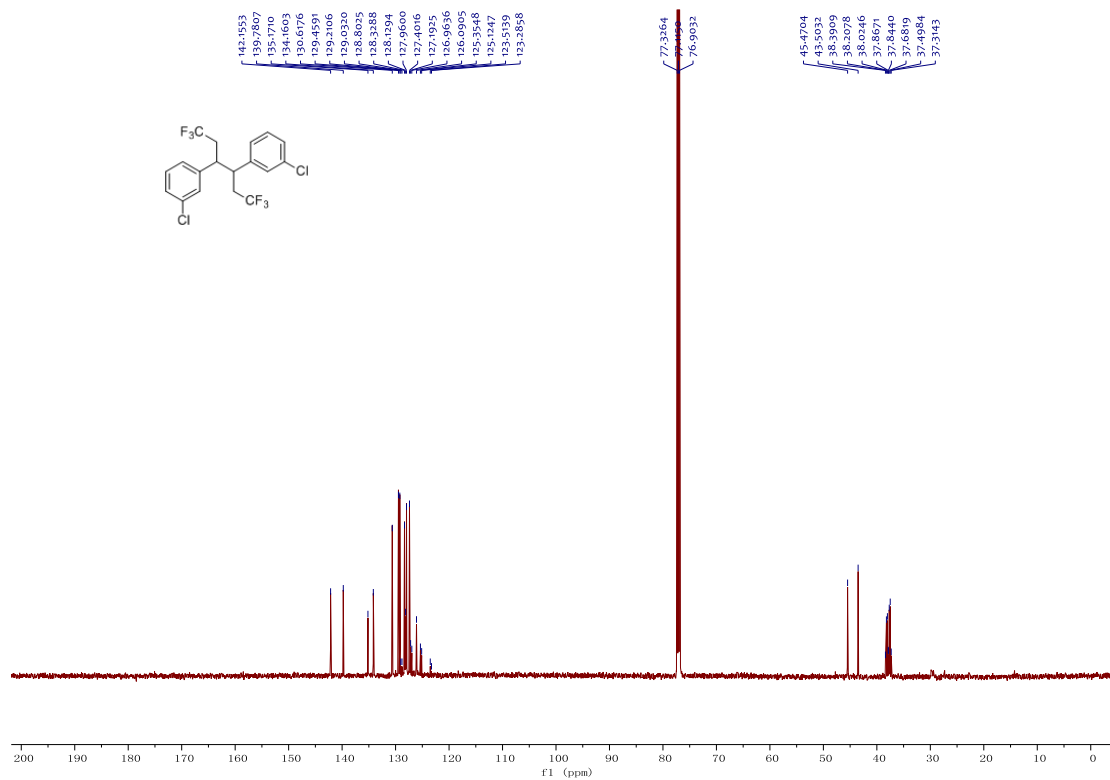

<sup>13</sup>C NMR spectrum (150 MHz, CDCl<sub>3</sub>) of **11**

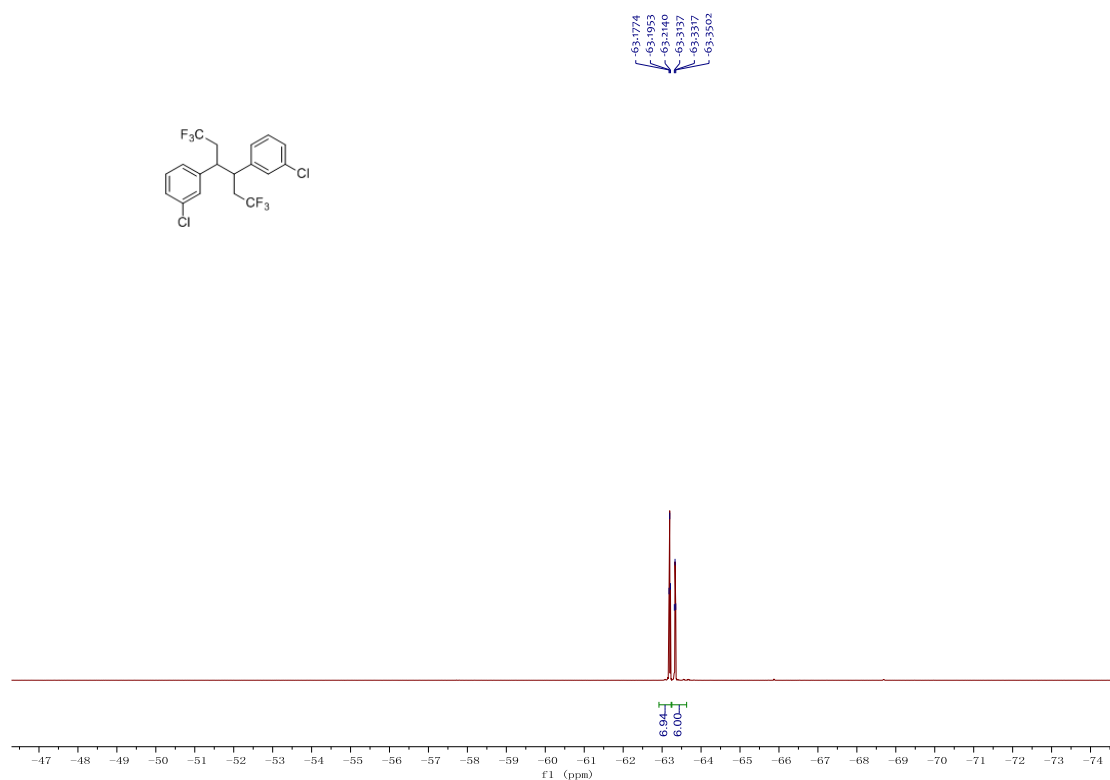

<sup>19</sup>F NMR spectrum (564 MHz, CDCl<sub>3</sub>) of **11**

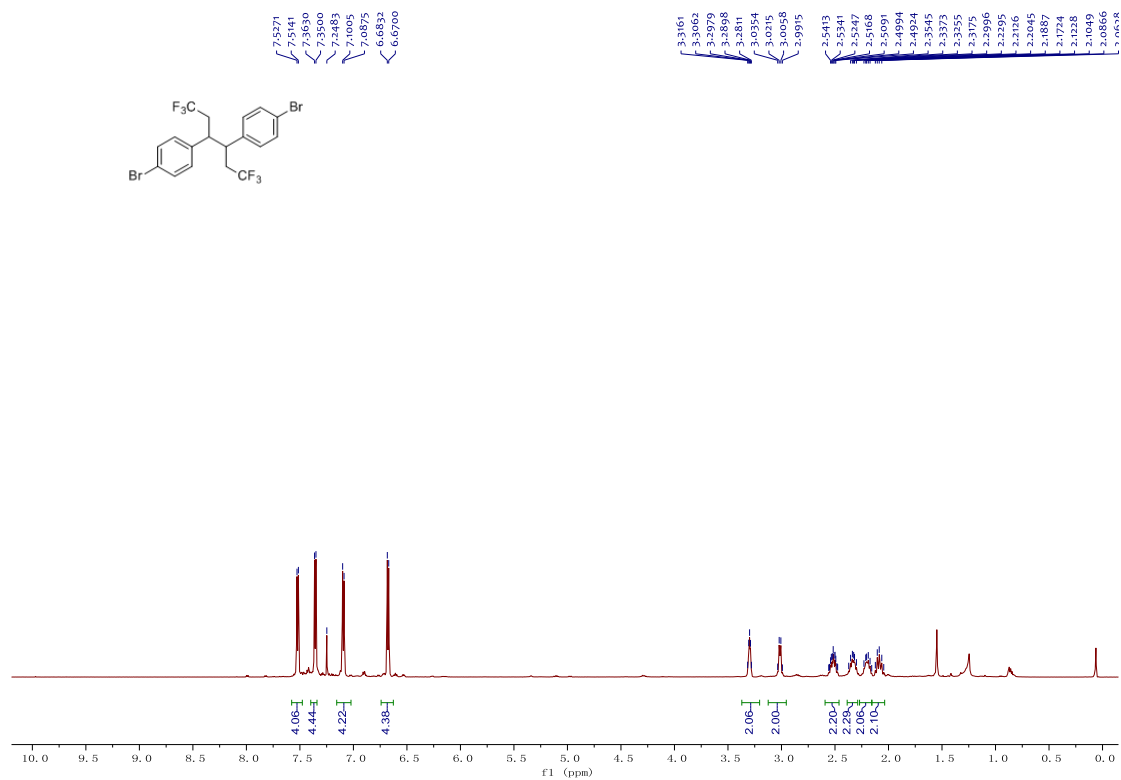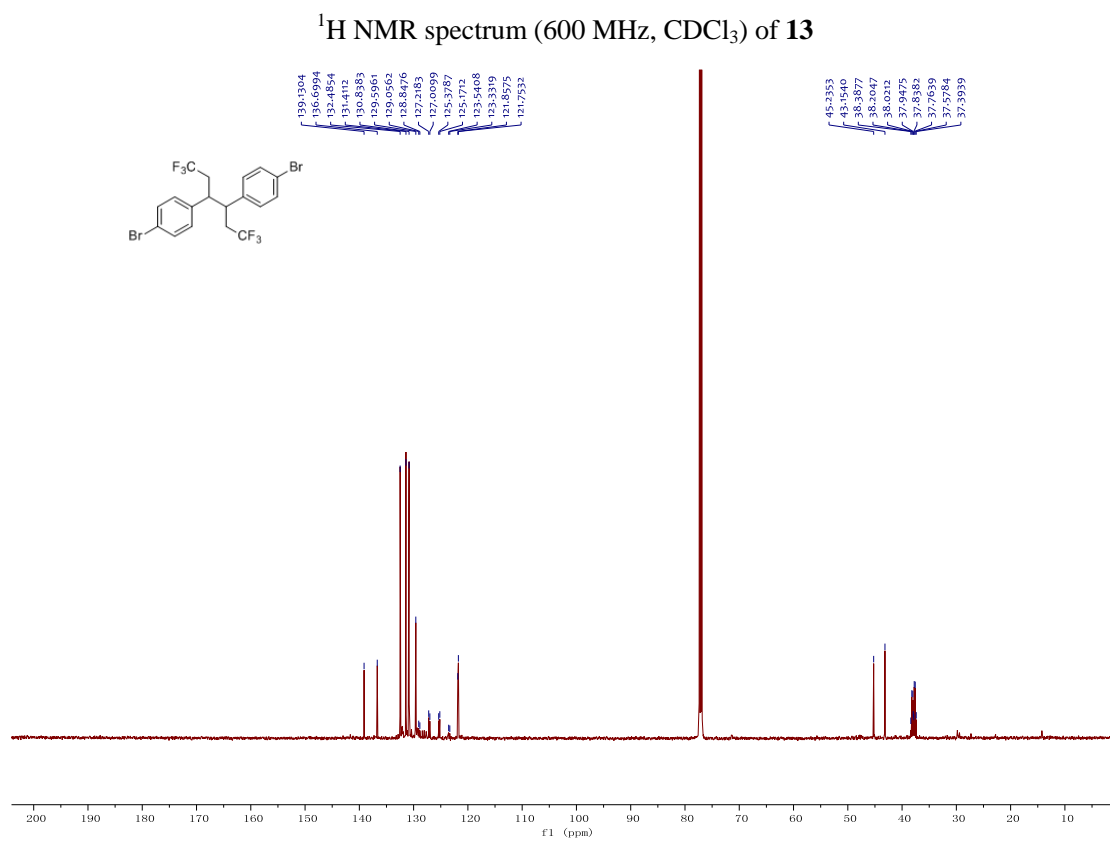

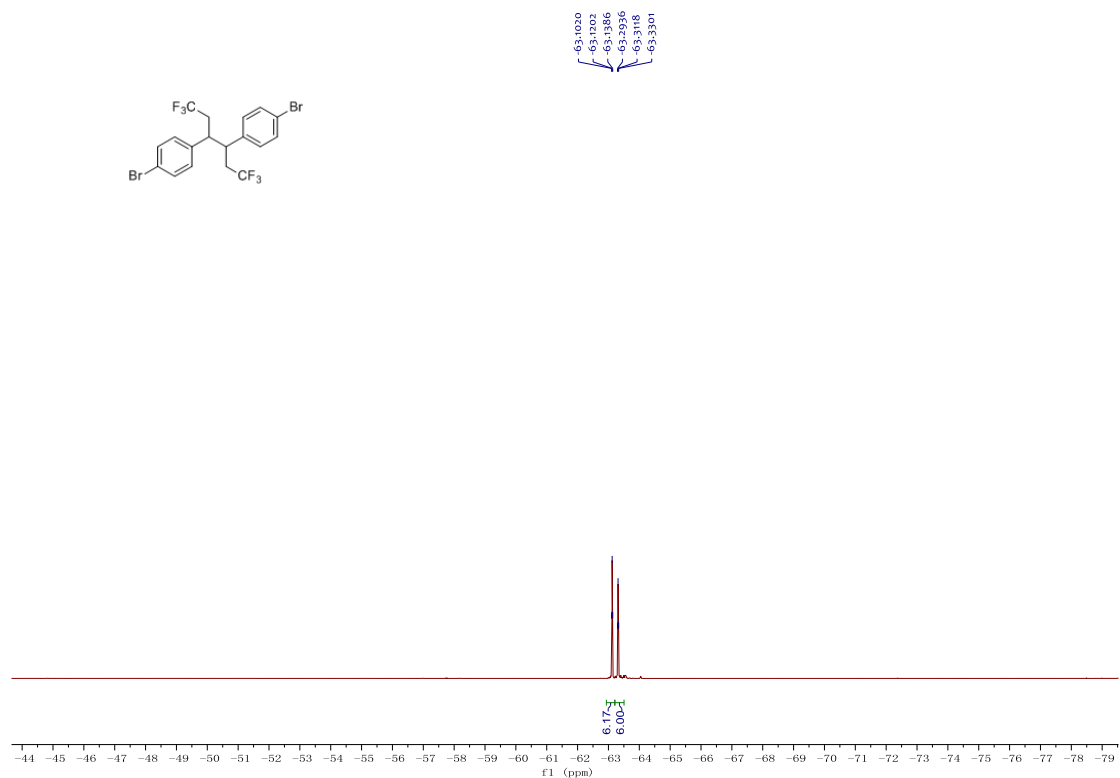

<sup>19</sup>F NMR spectrum (564 MHz, CDCl<sub>3</sub>) of 13

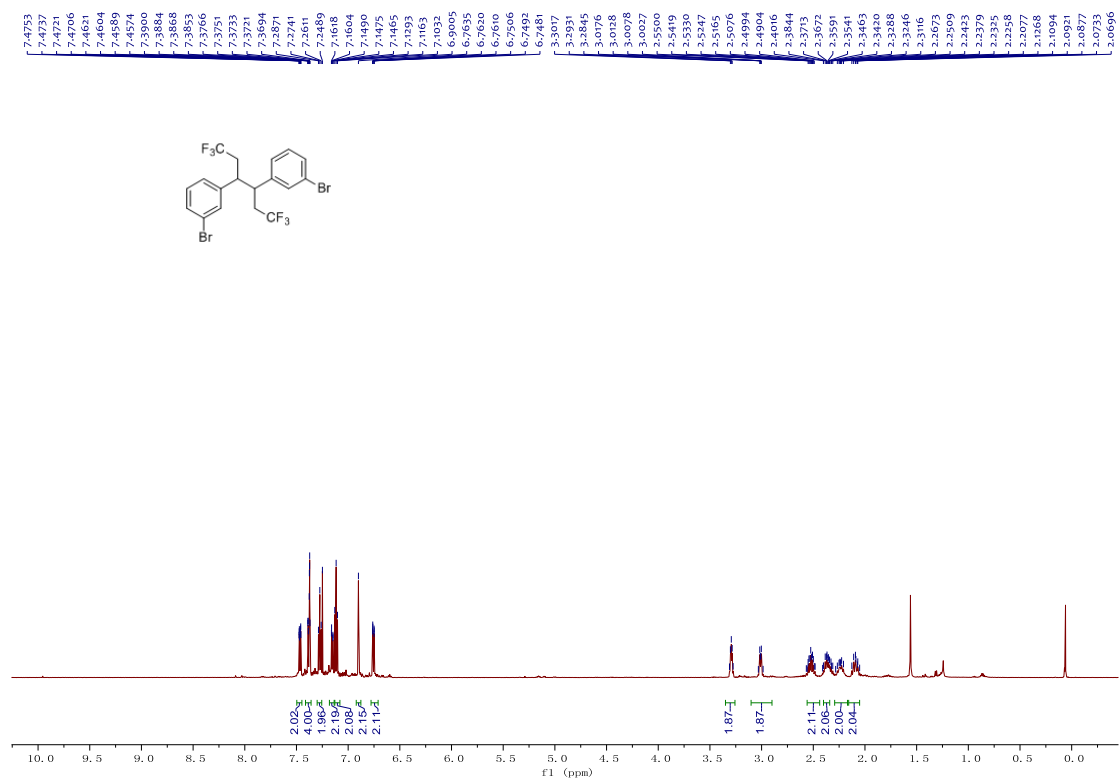

<sup>1</sup>H NMR spectrum (600 MHz, CDCl<sub>3</sub>) of 14

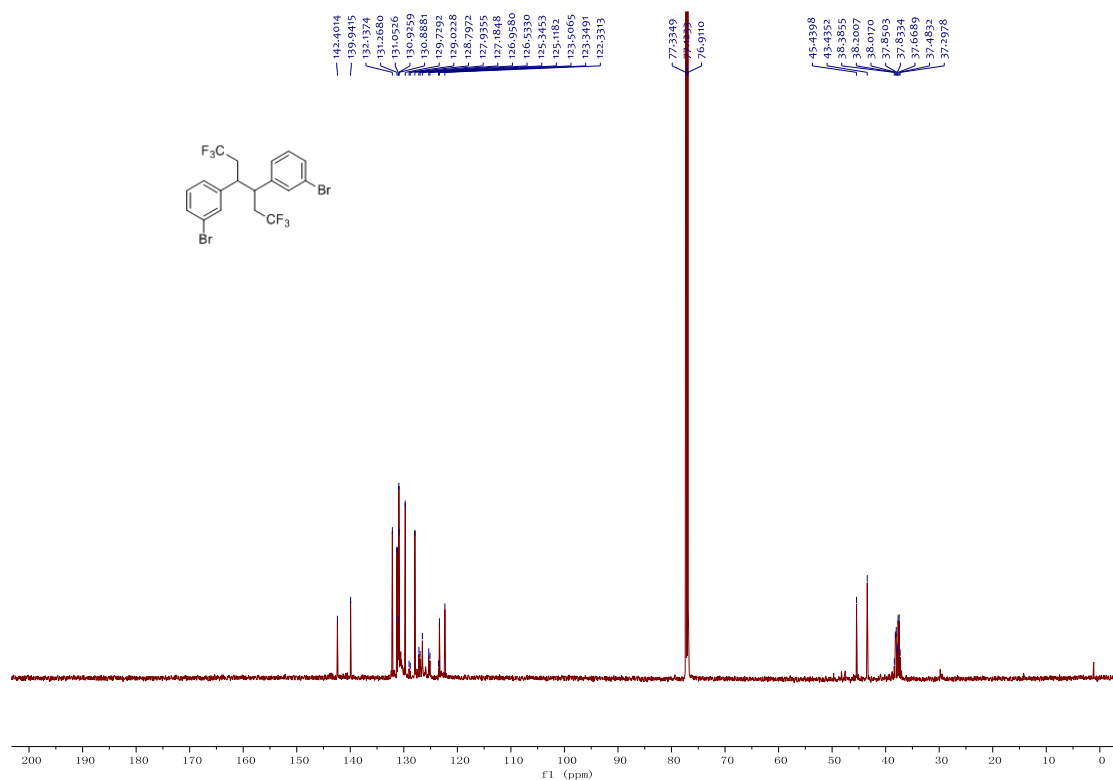

<sup>13</sup>C NMR spectrum (150 MHz, CDCl<sub>3</sub>) of **14**

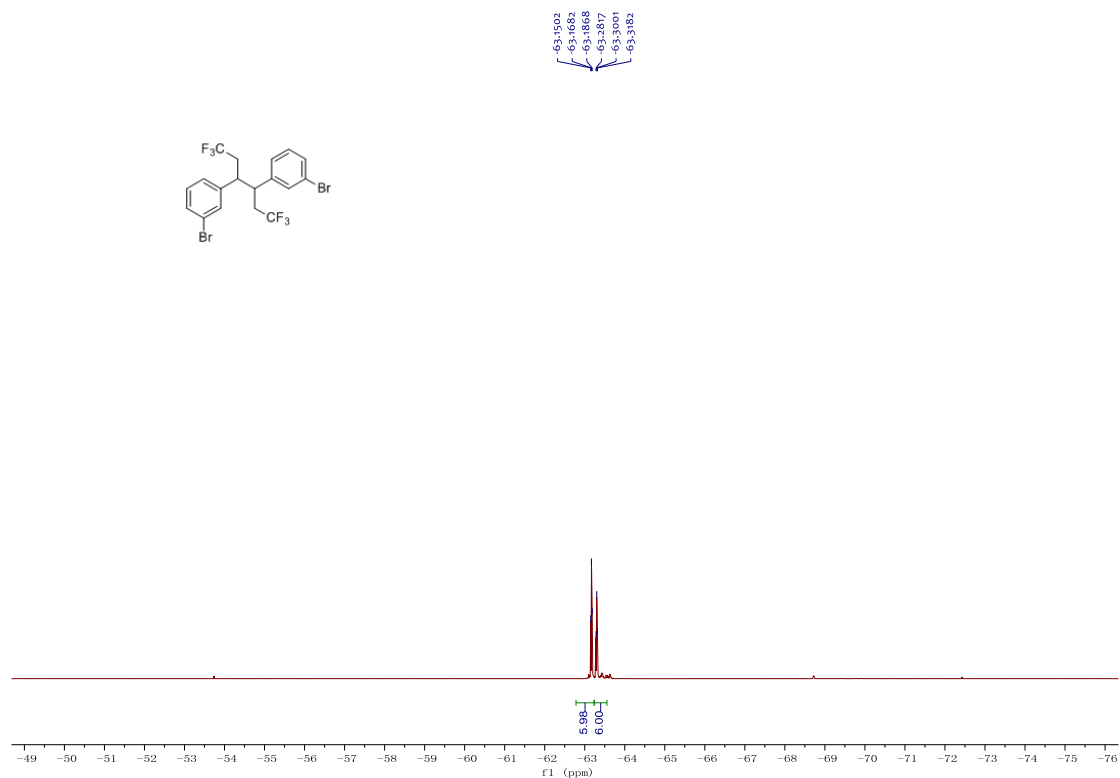

<sup>19</sup>F NMR spectrum (564 MHz, CDCl<sub>3</sub>) of **14**

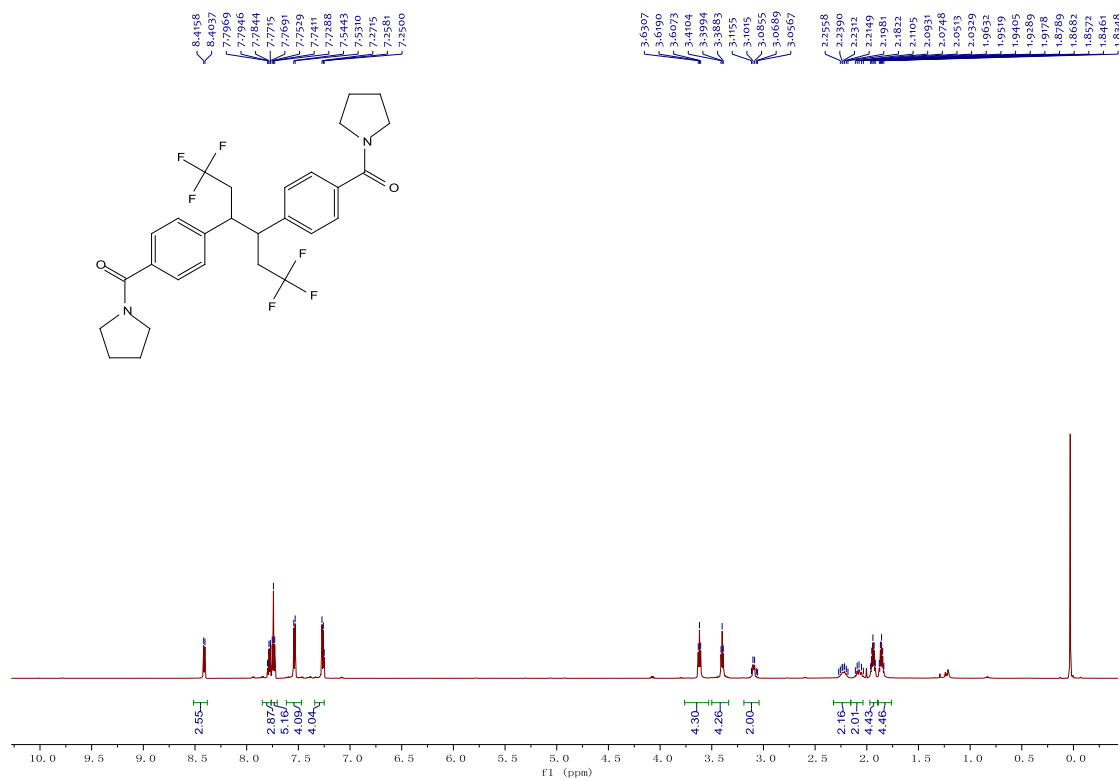

<sup>1</sup>H NMR spectrum (600 MHz, CDCl<sub>3</sub>) of 16

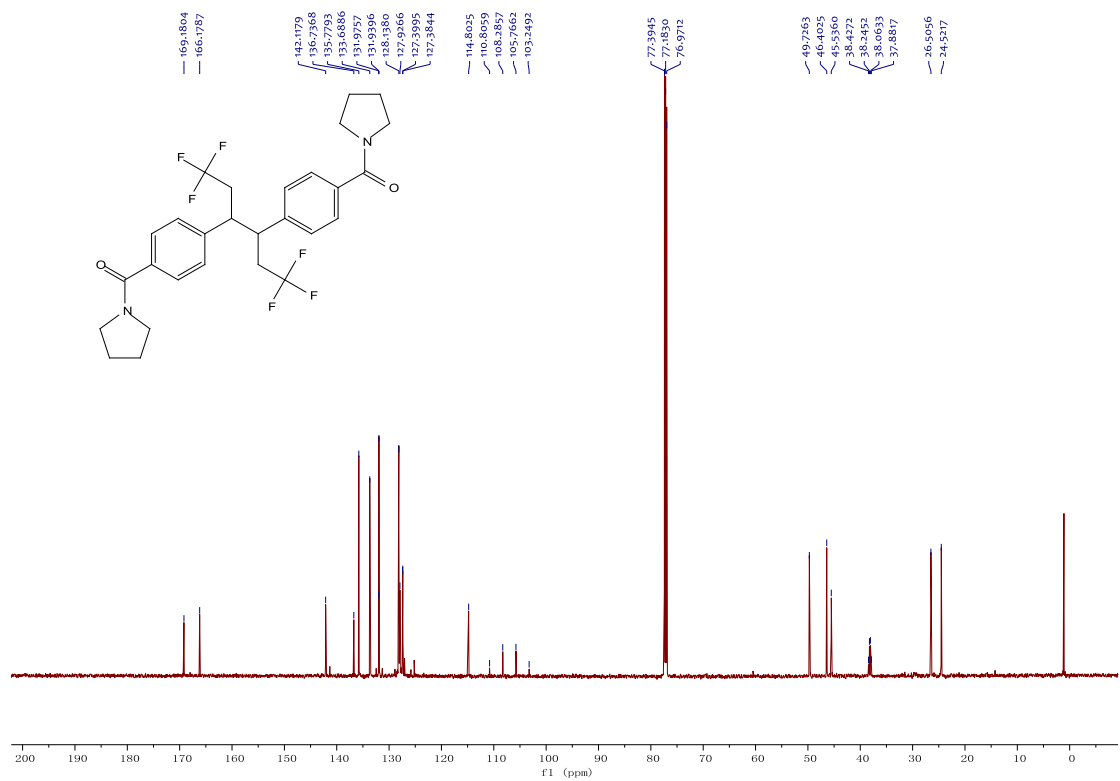

<sup>13</sup>C NMR spectrum (150 MHz, CDCl<sub>3</sub>) of 16

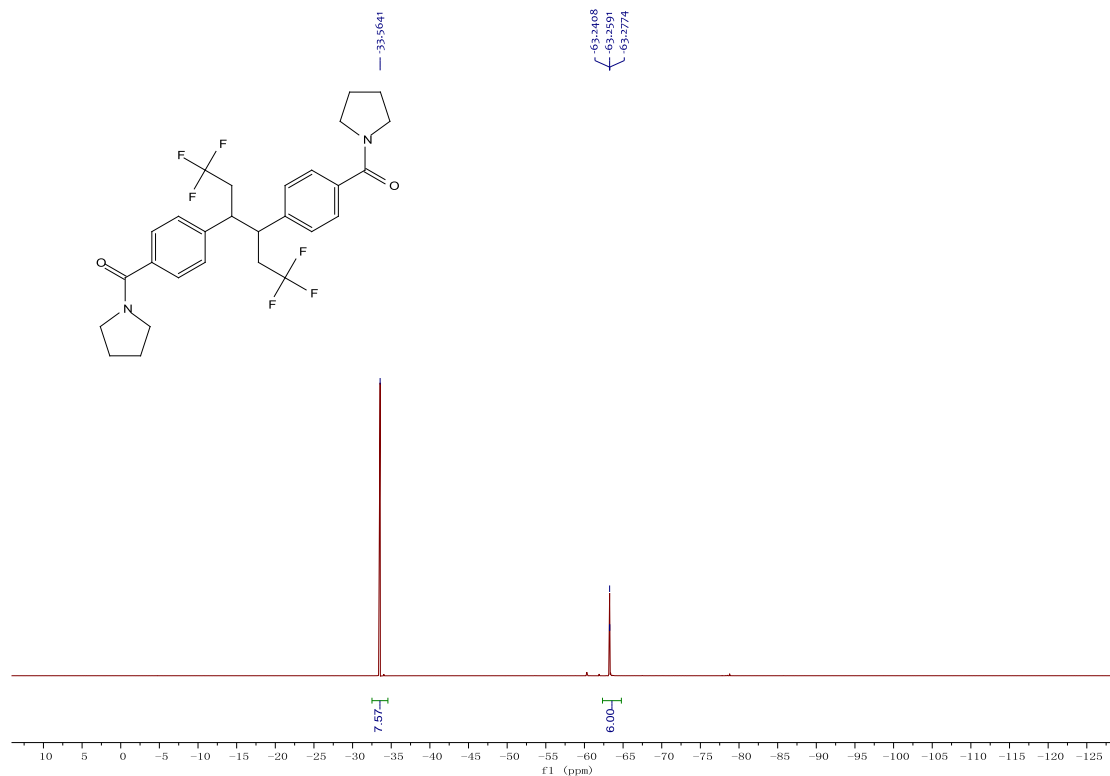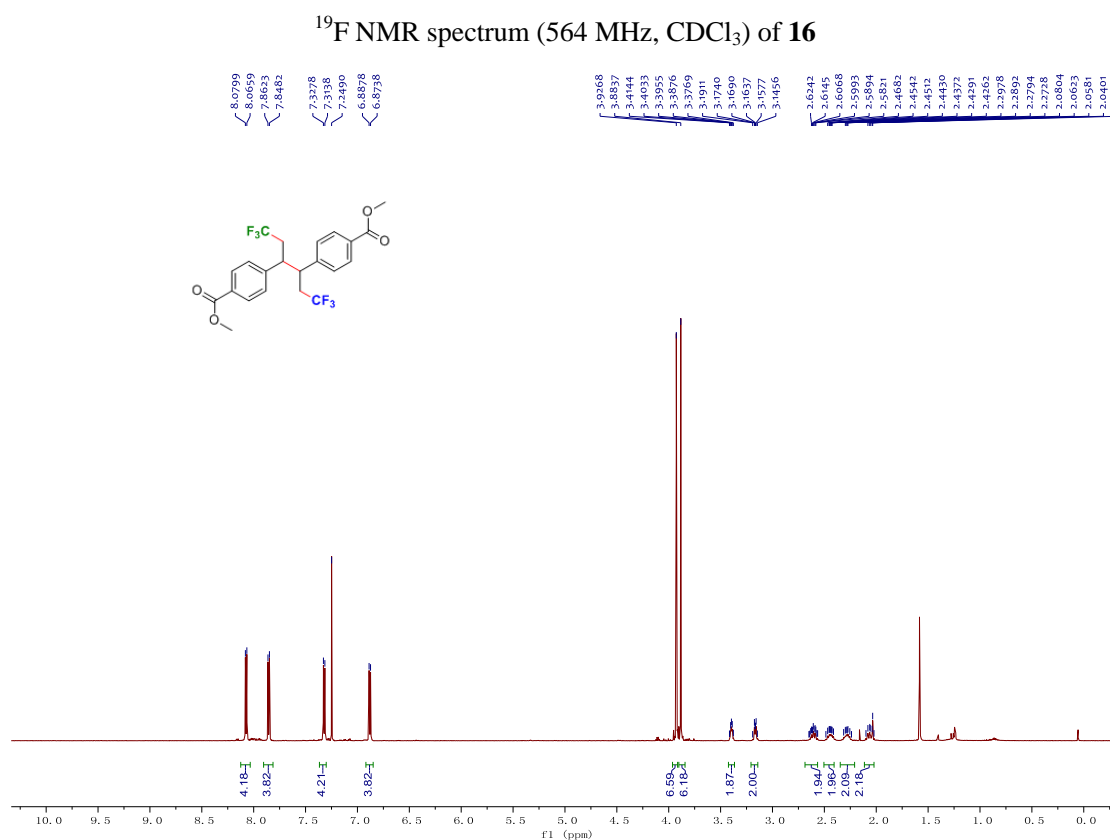

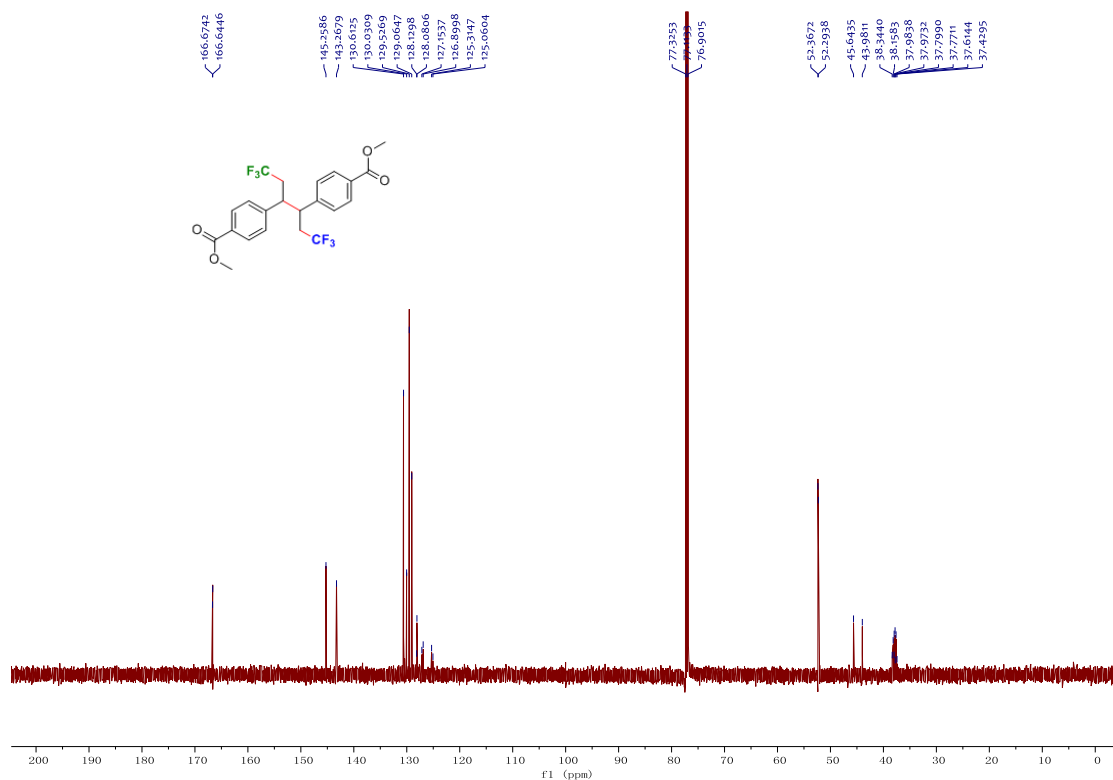

<sup>13</sup>C NMR spectrum (150 MHz, CDCl<sub>3</sub>) of 17

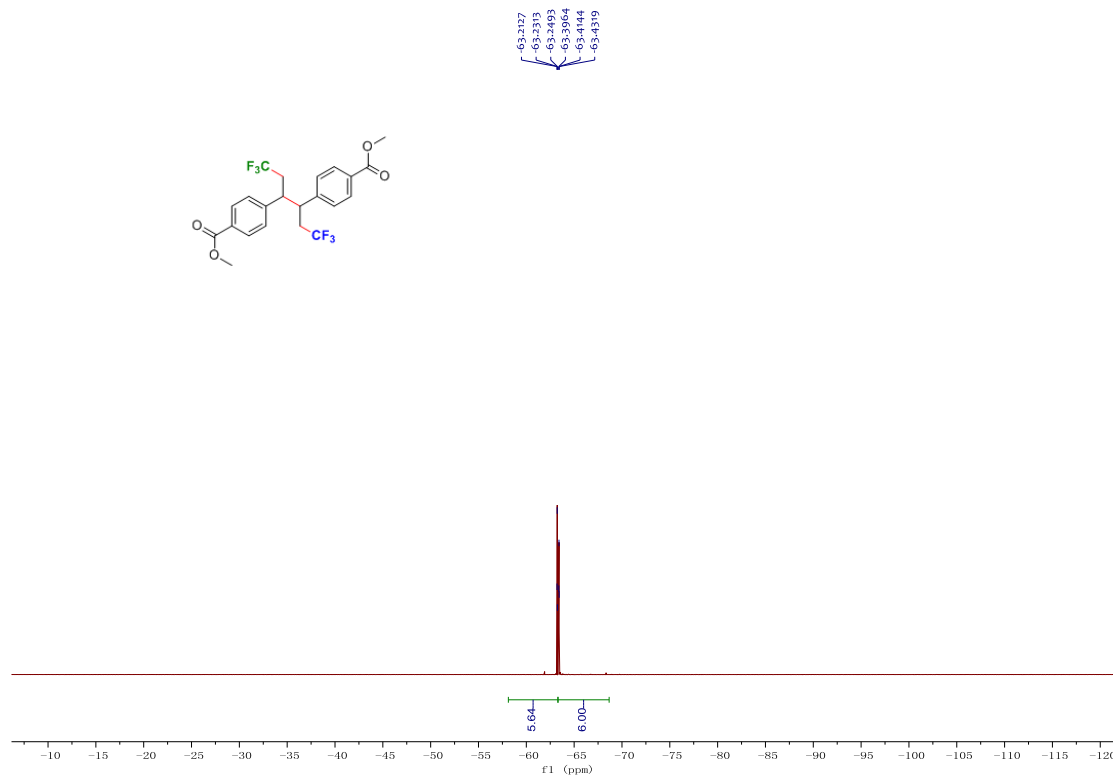

<sup>19</sup>F NMR spectrum (564 MHz, CDCl<sub>3</sub>) of 17



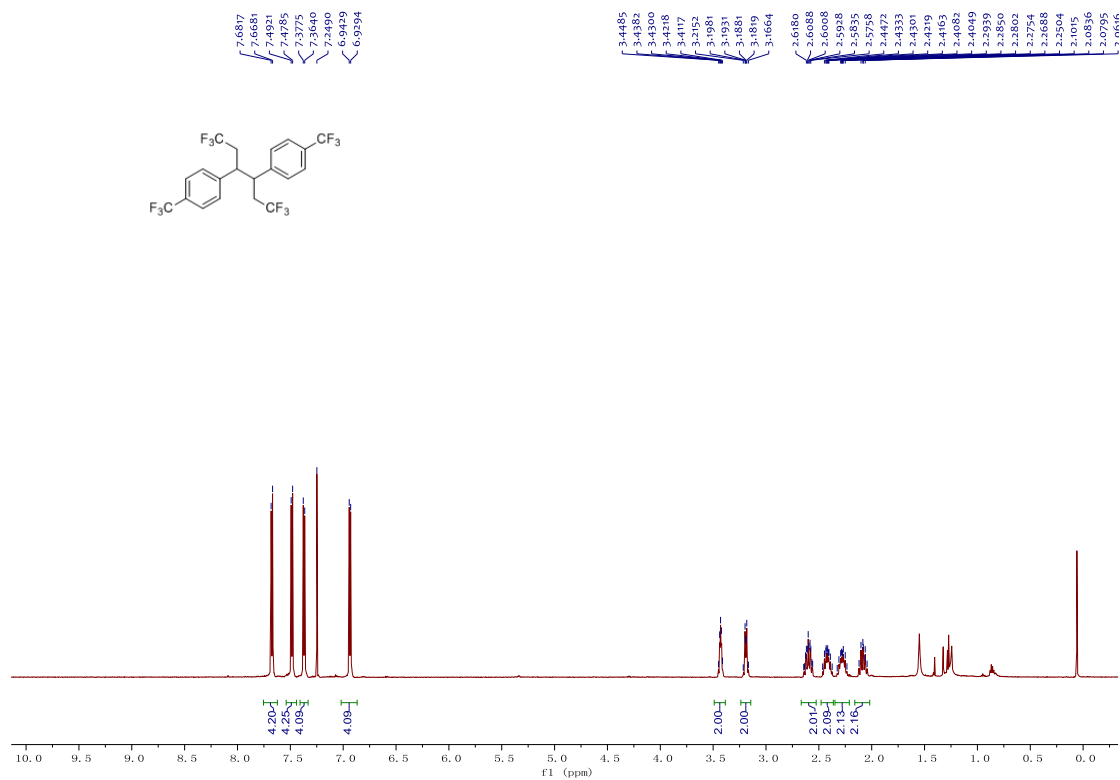

<sup>1</sup>H NMR spectrum (600 MHz, CDCl<sub>3</sub>) of 18

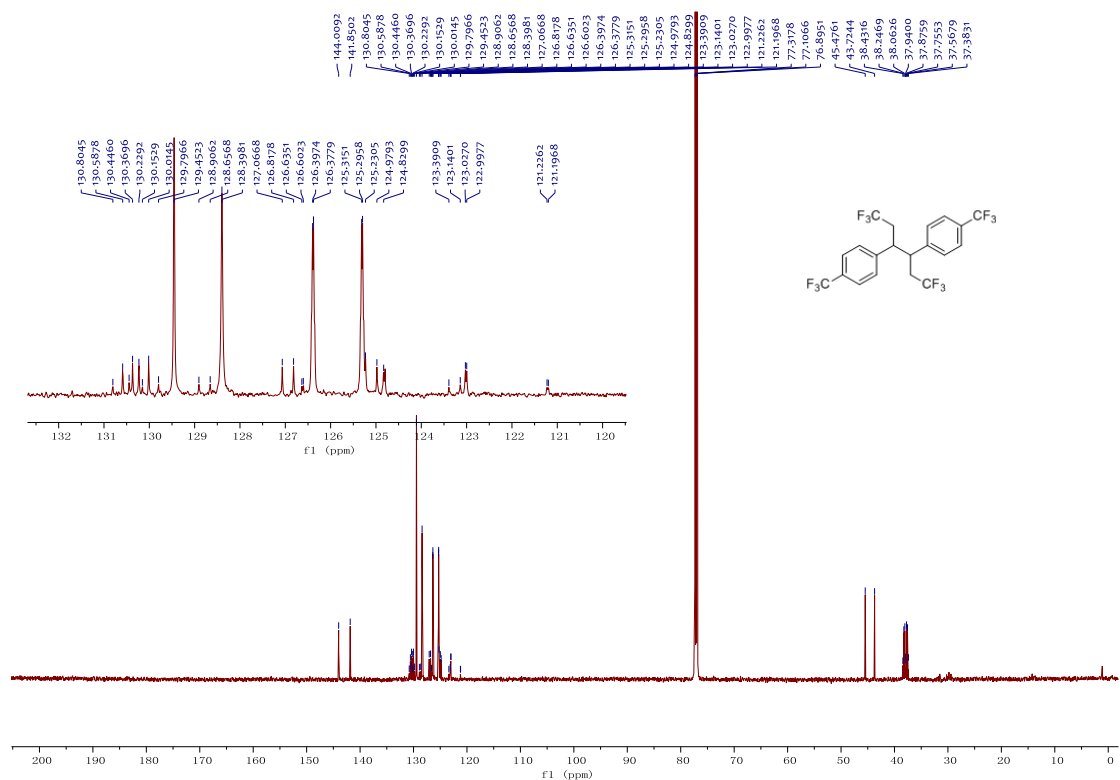

<sup>13</sup>C NMR spectrum (150 MHz, CDCl<sub>3</sub>) of 18

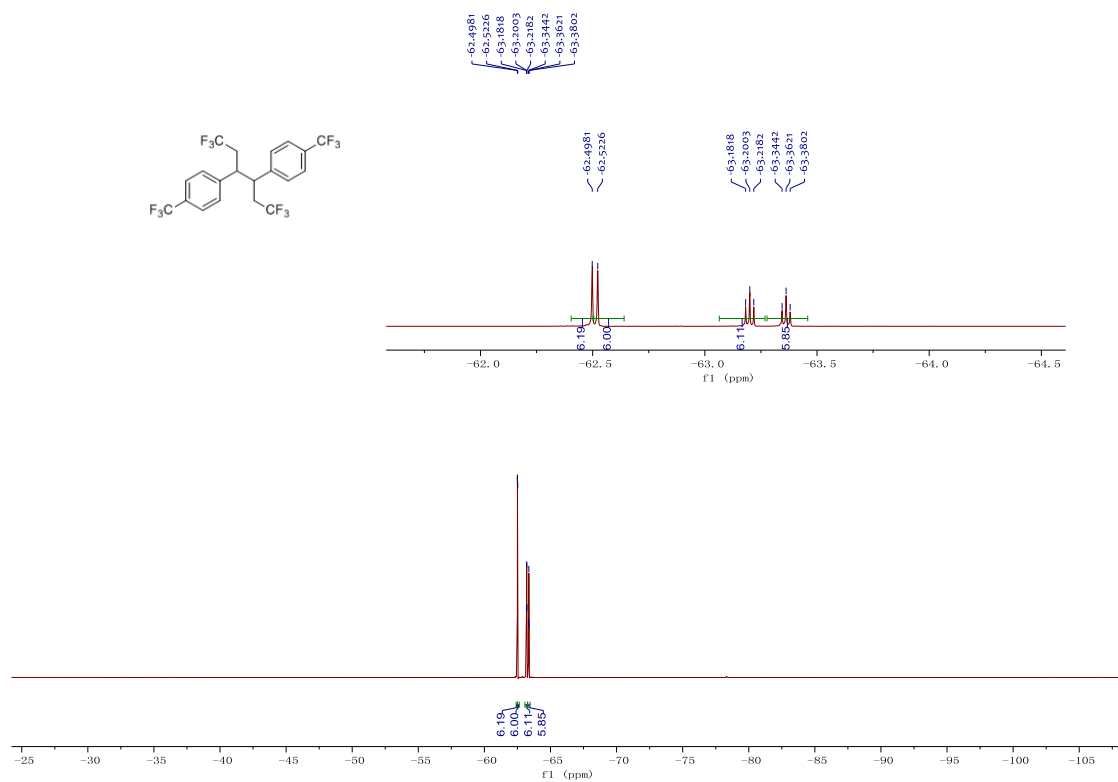

<sup>19</sup>F NMR spectrum (564 MHz, CDCl<sub>3</sub>) of 18

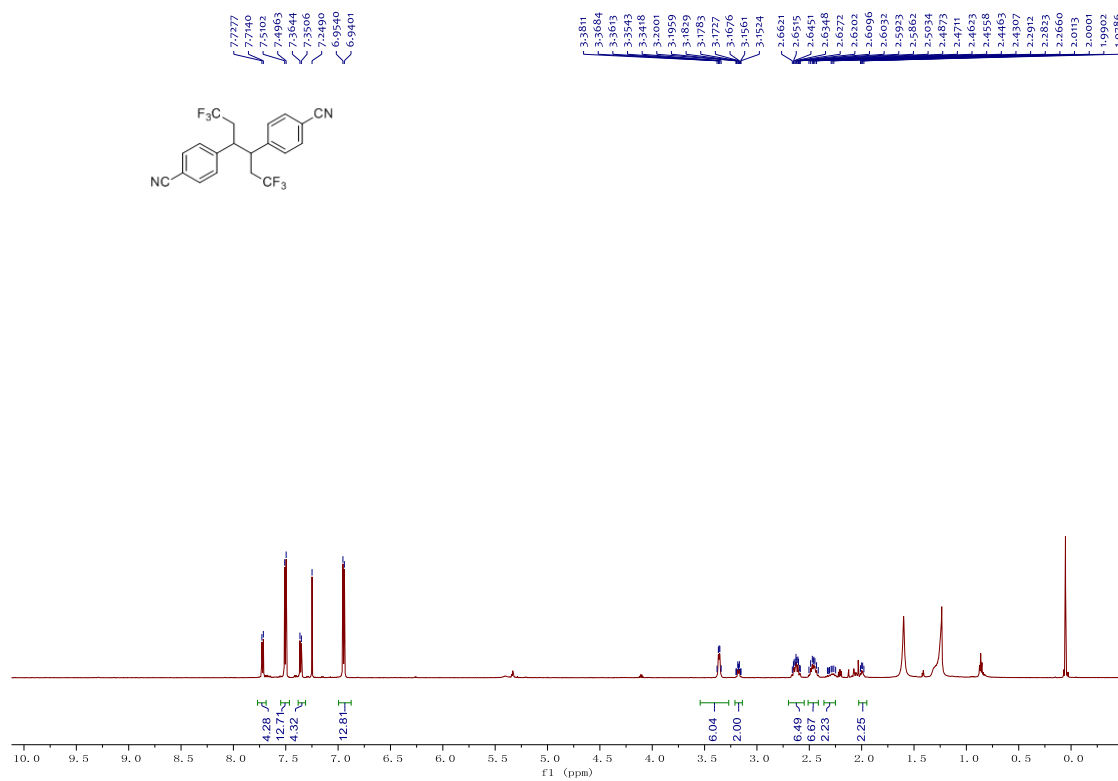

<sup>1</sup>H NMR spectrum (600 MHz, CDCl<sub>3</sub>) of 19

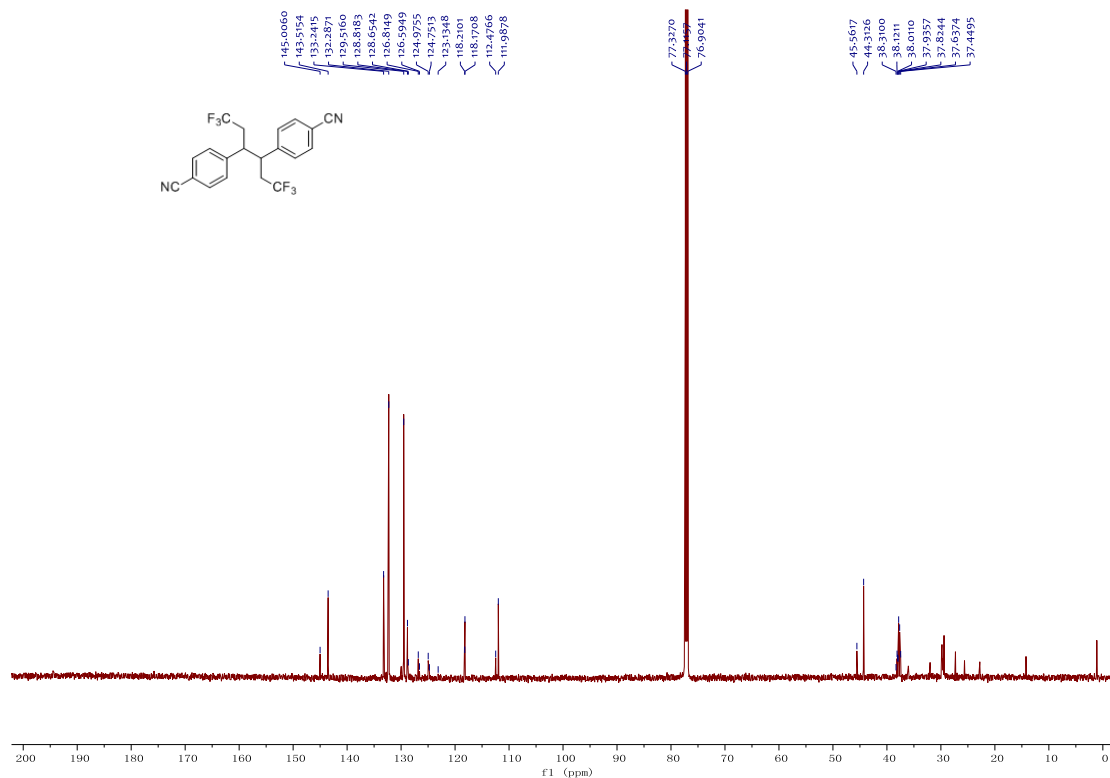

<sup>13</sup>C NMR spectrum (150 MHz, CDCl<sub>3</sub>) of **19**

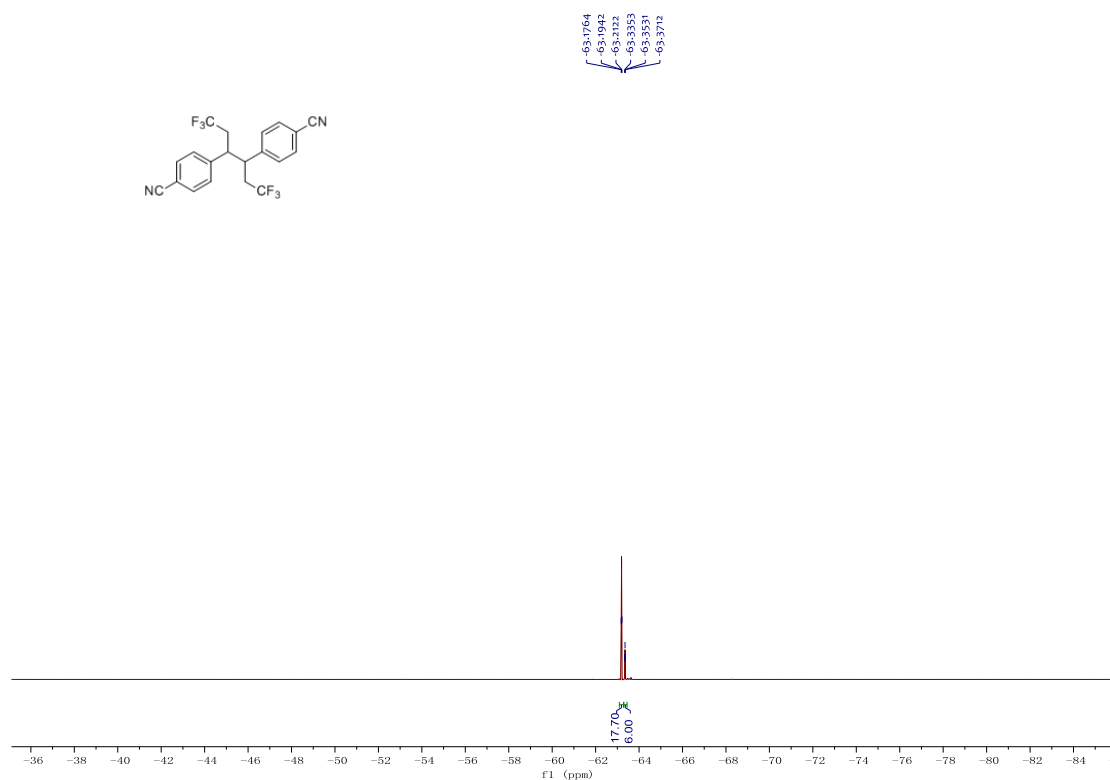

<sup>19</sup>F NMR spectrum (564 MHz, CDCl<sub>3</sub>) of **19**

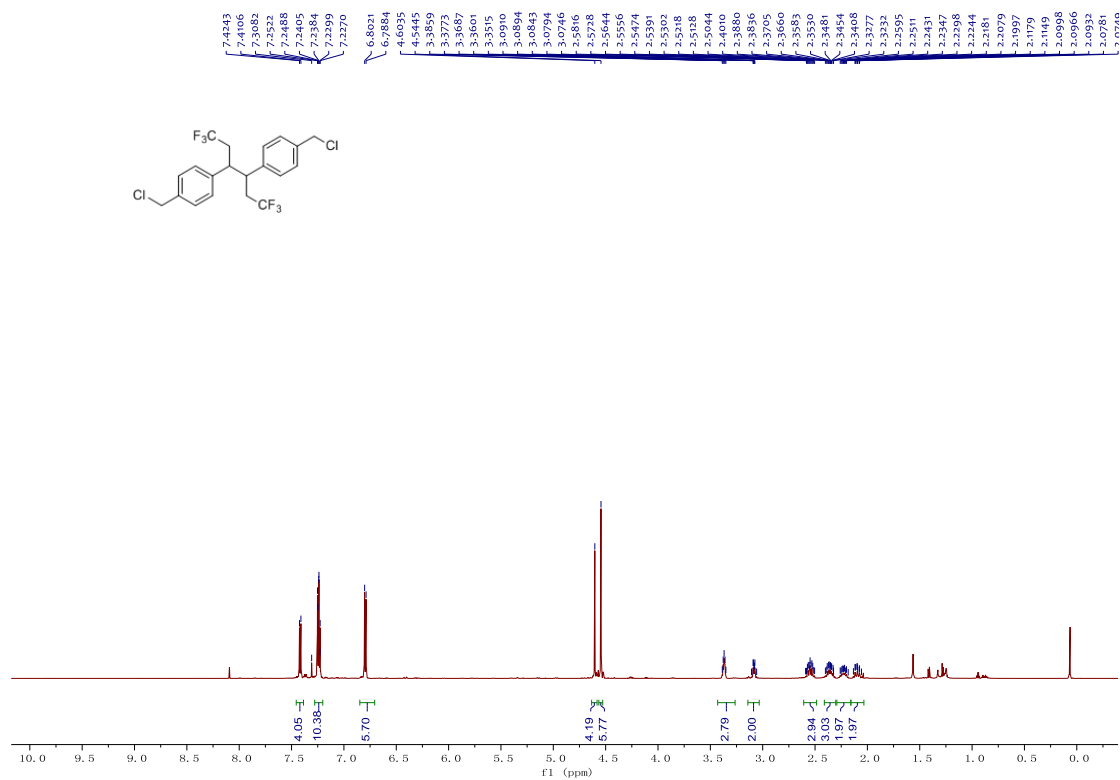

<sup>1</sup>H NMR spectrum (600 MHz, CDCl<sub>3</sub>) of **20**

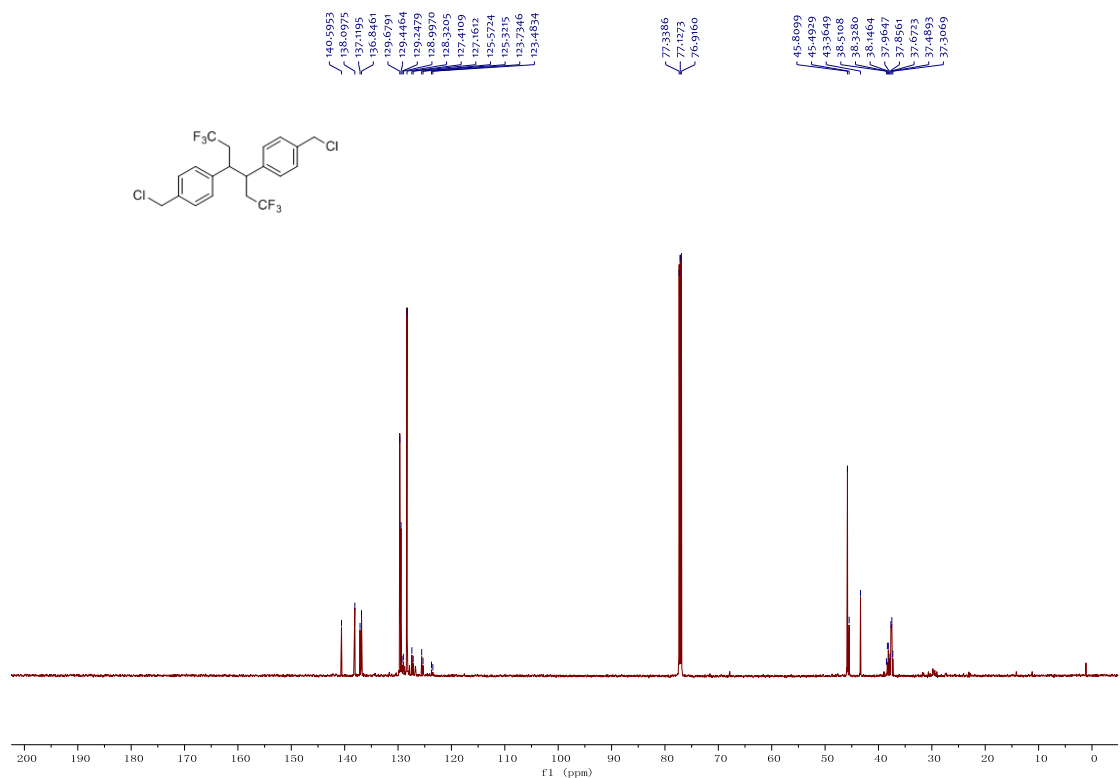

<sup>13</sup>C NMR spectrum (150 MHz, CDCl<sub>3</sub>) of **20**

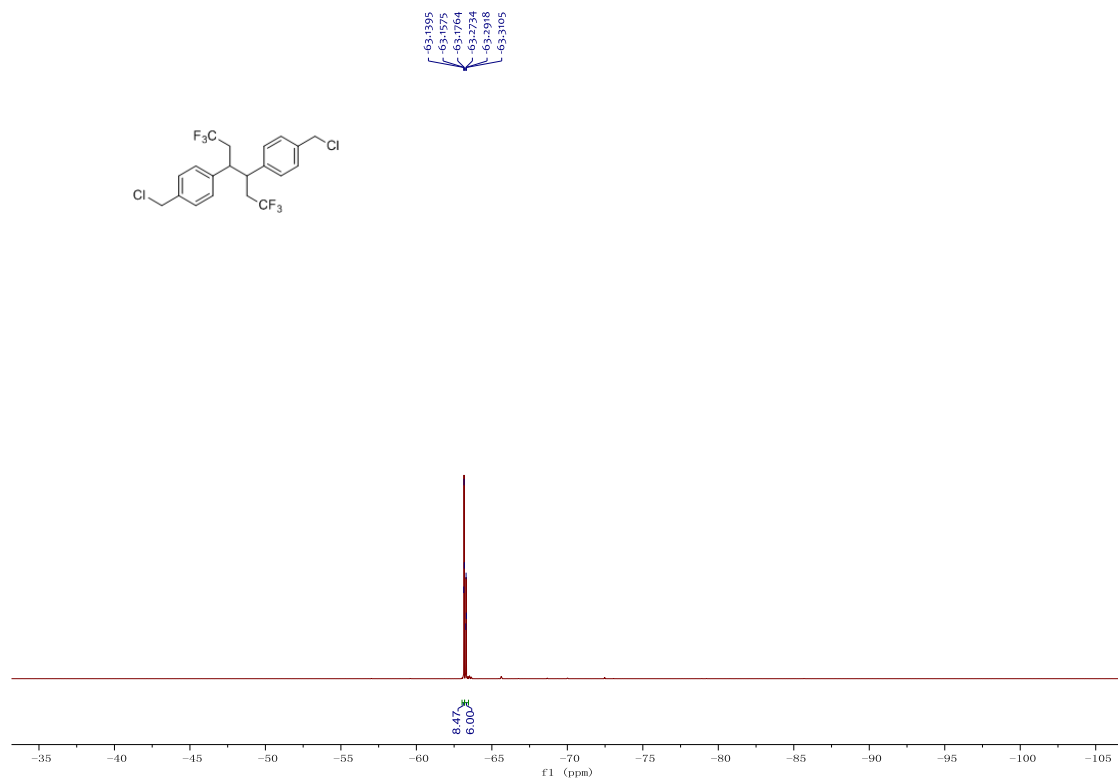

$^{19}\text{F}$  NMR spectrum (564 MHz,  $\text{CDCl}_3$ ) of **20**

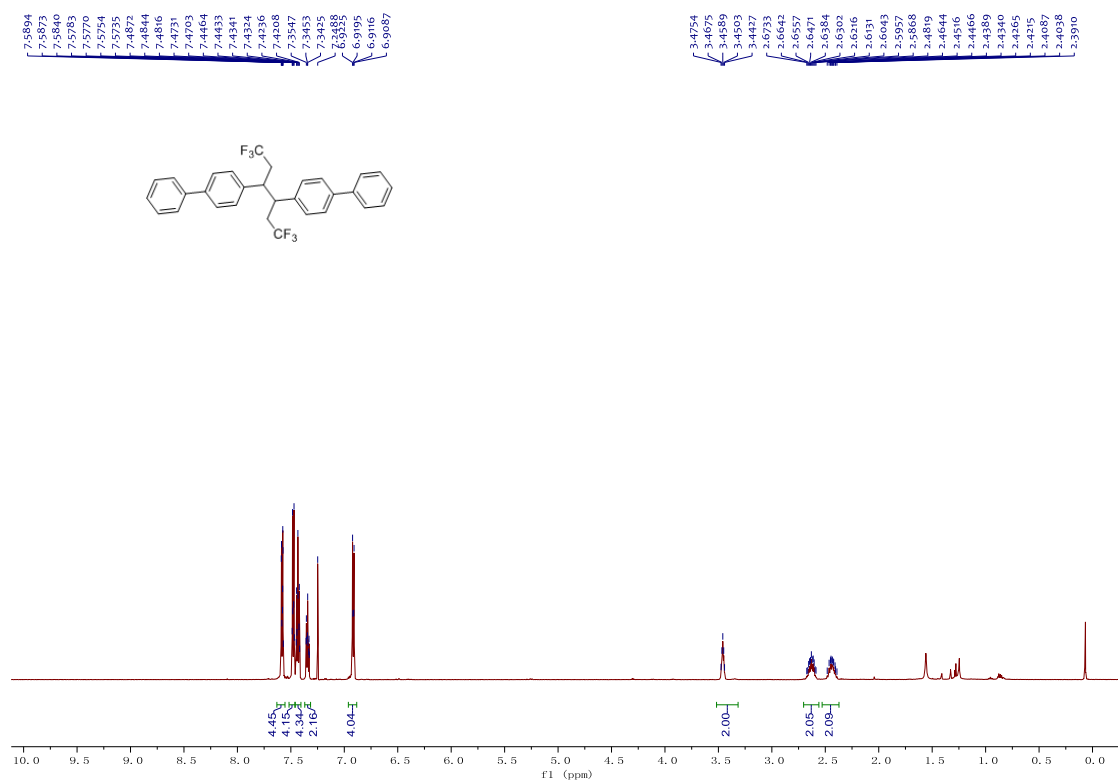

$^1\text{H}$  NMR spectrum (600 MHz,  $\text{CDCl}_3$ ) of **21**

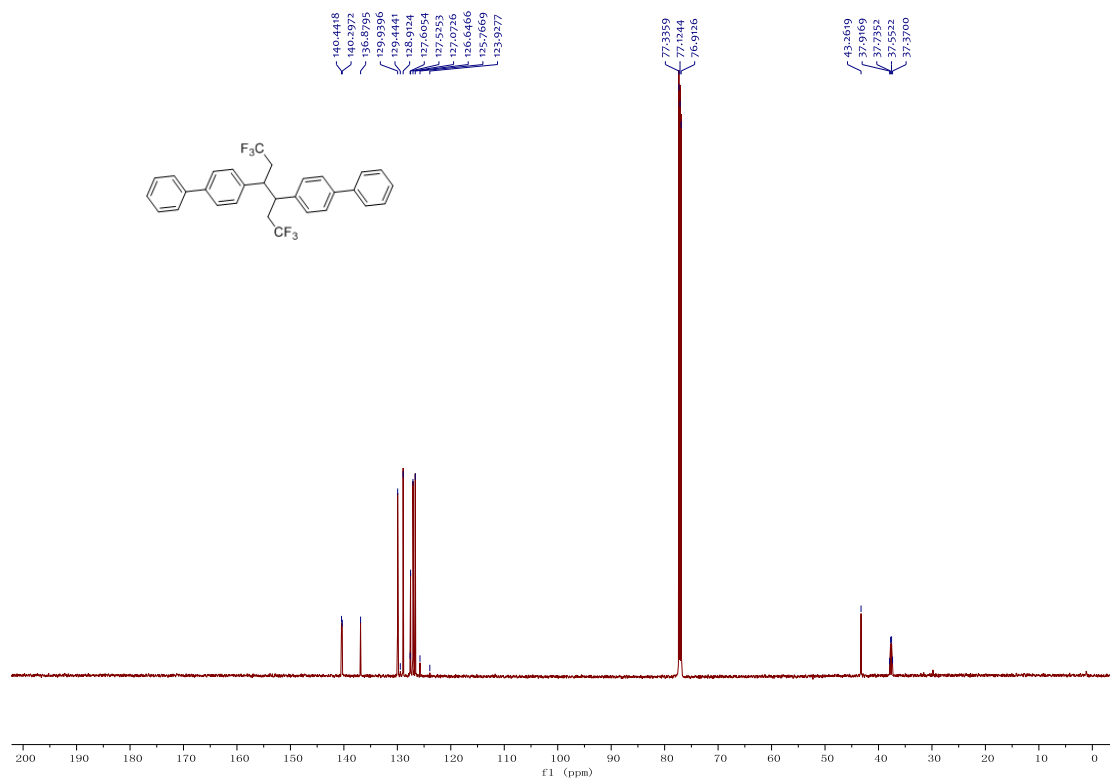

<sup>13</sup>C NMR spectrum (150 MHz, CDCl<sub>3</sub>) of **21**

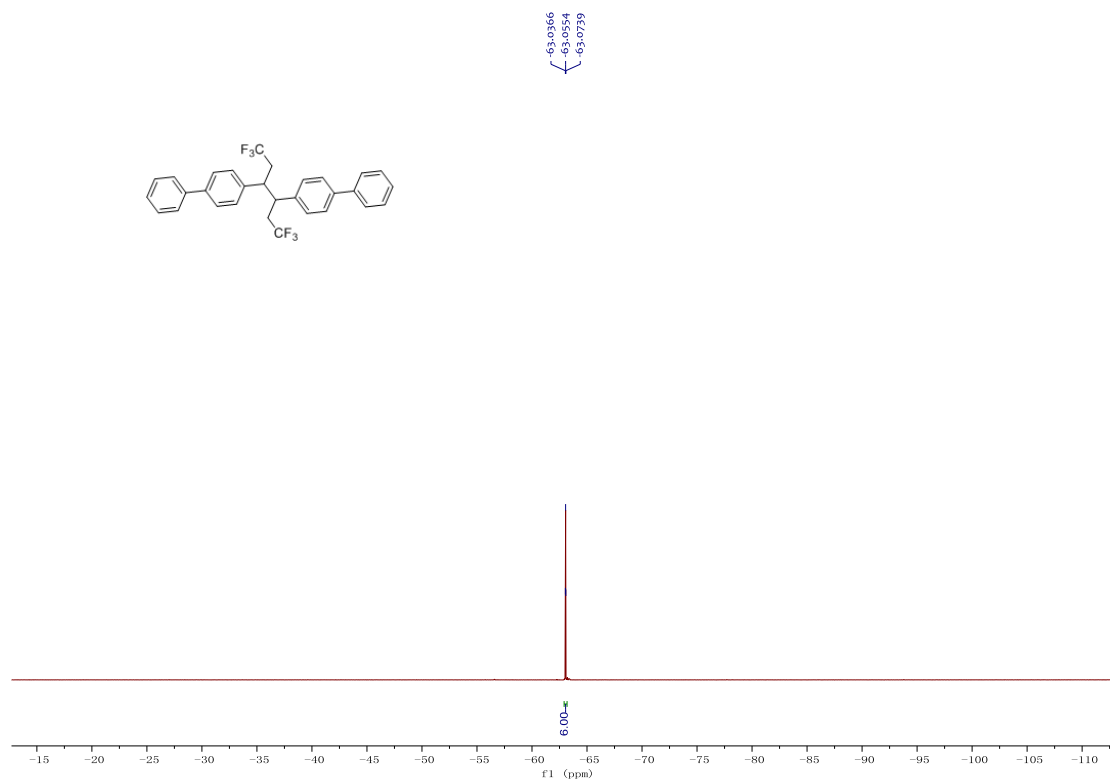

<sup>19</sup>F NMR spectrum (564 MHz, CDCl<sub>3</sub>) of **21**

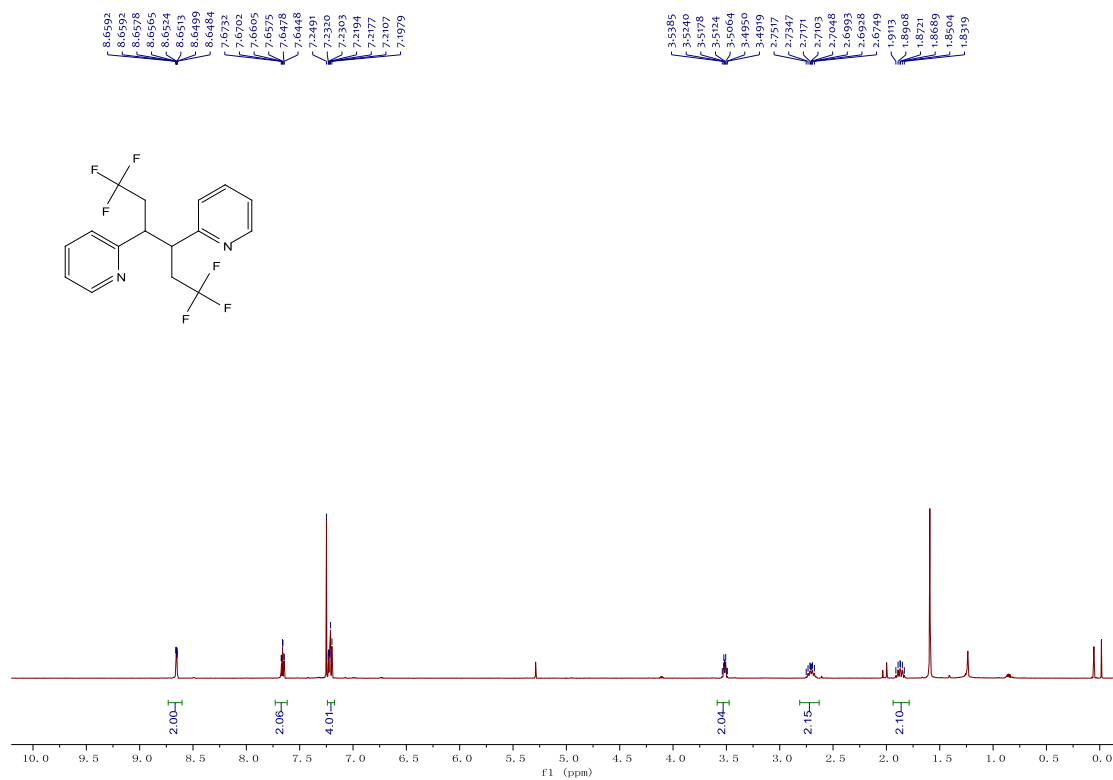

<sup>1</sup>H NMR spectrum (600 MHz, CDCl<sub>3</sub>) of **22** (syn)

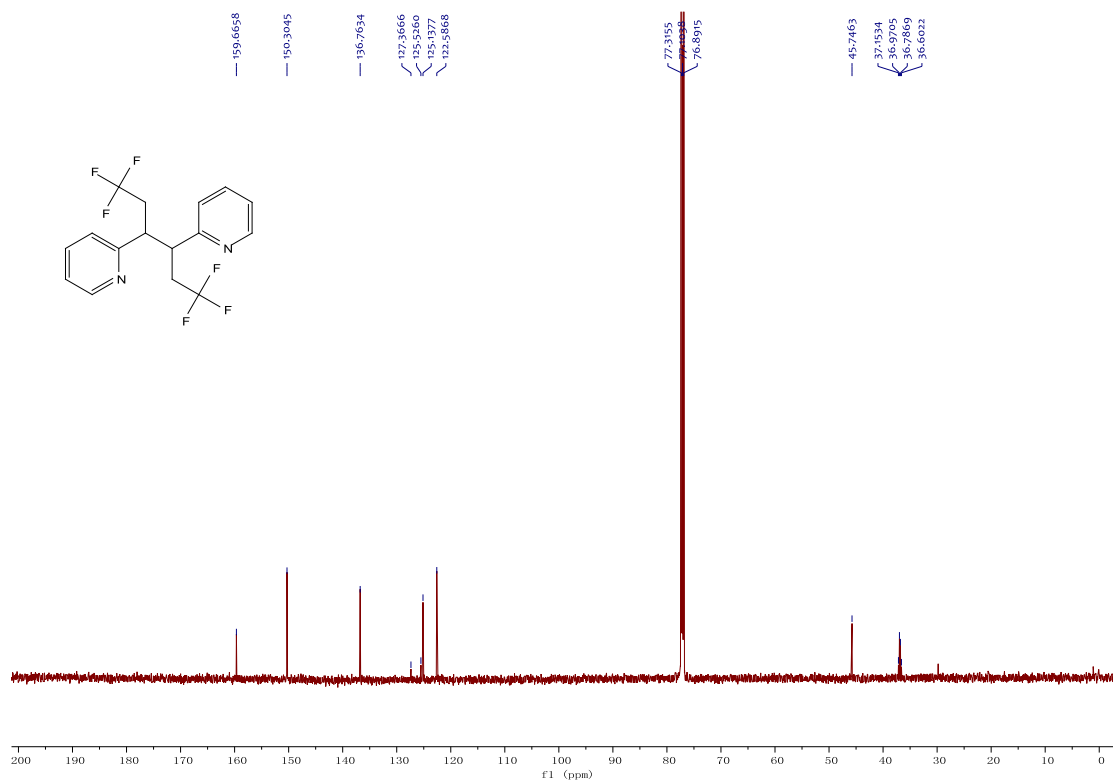

<sup>13</sup>C NMR spectrum (150 MHz, CDCl<sub>3</sub>) of **22** (syn)

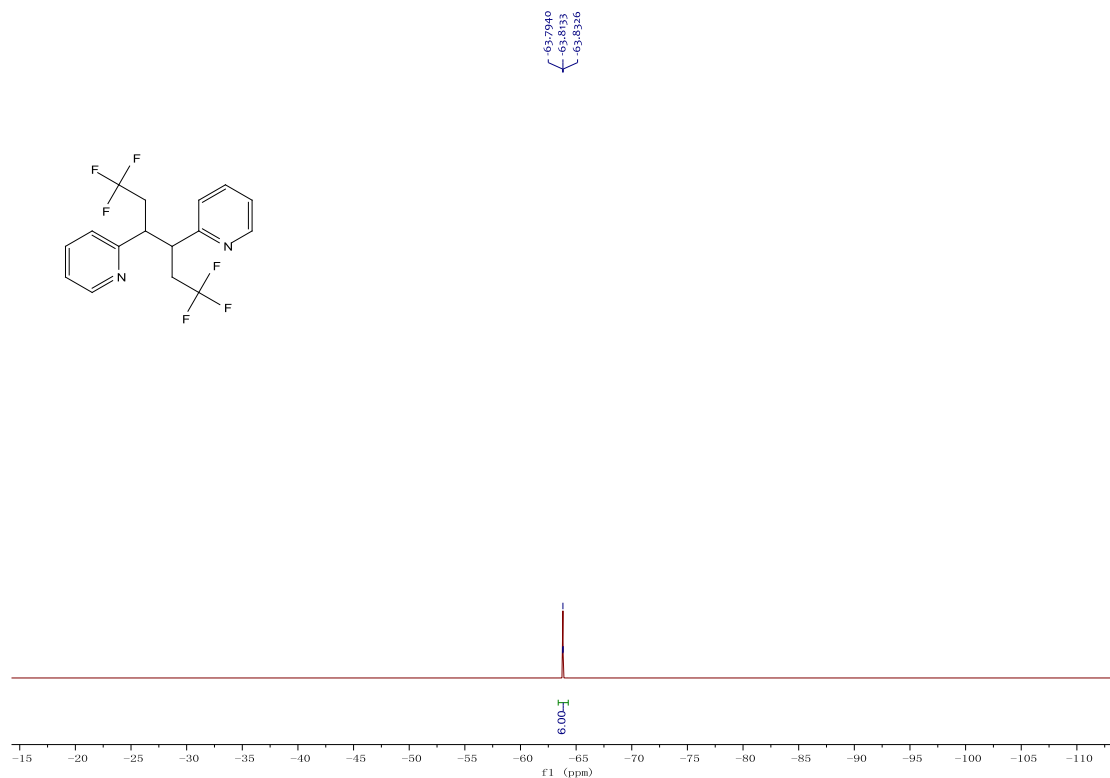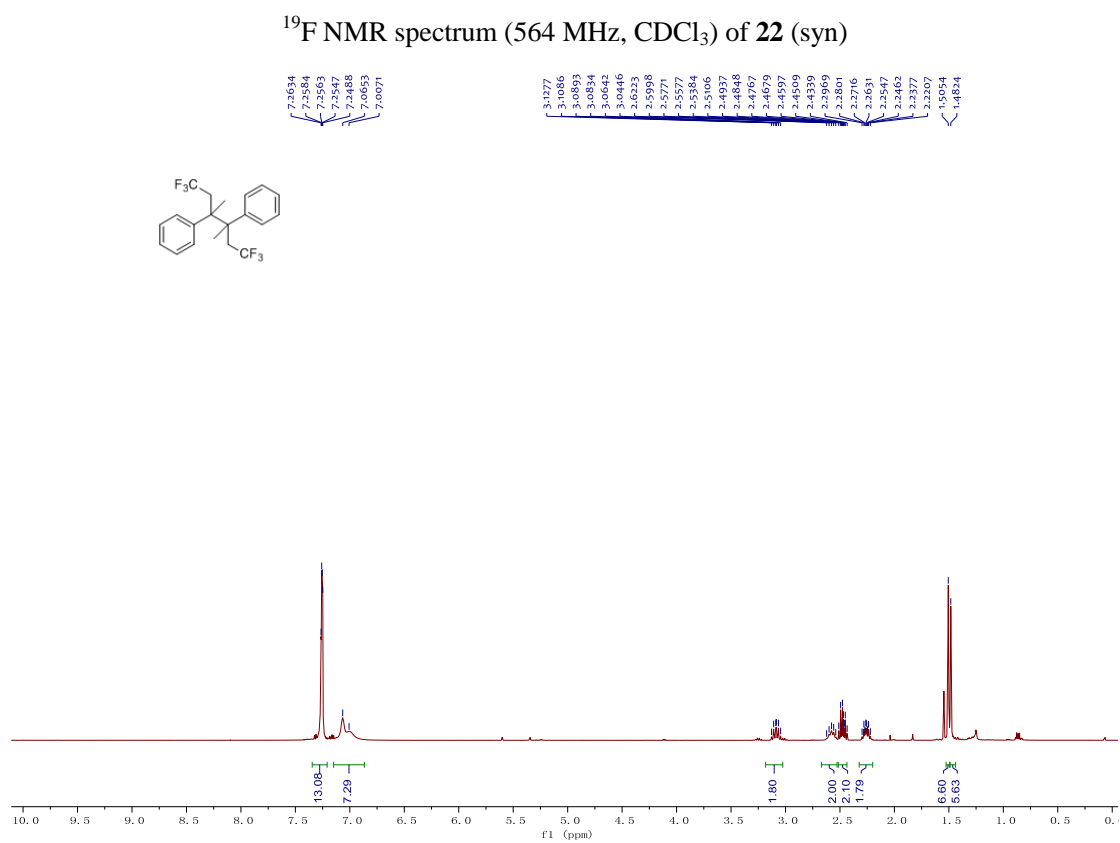

$^1\text{H}$  NMR spectrum (600 MHz,  $\text{CDCl}_3$ ) of **23**



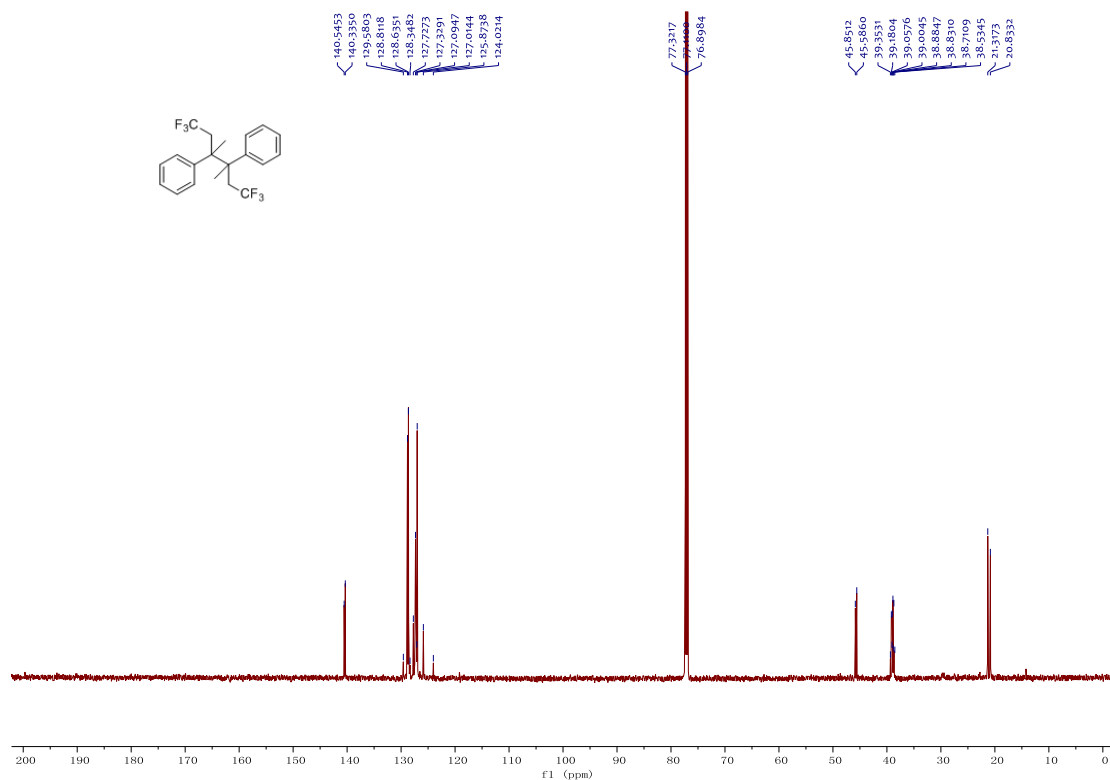

<sup>13</sup>C NMR spectrum (150 MHz, CDCl<sub>3</sub>) of **23**

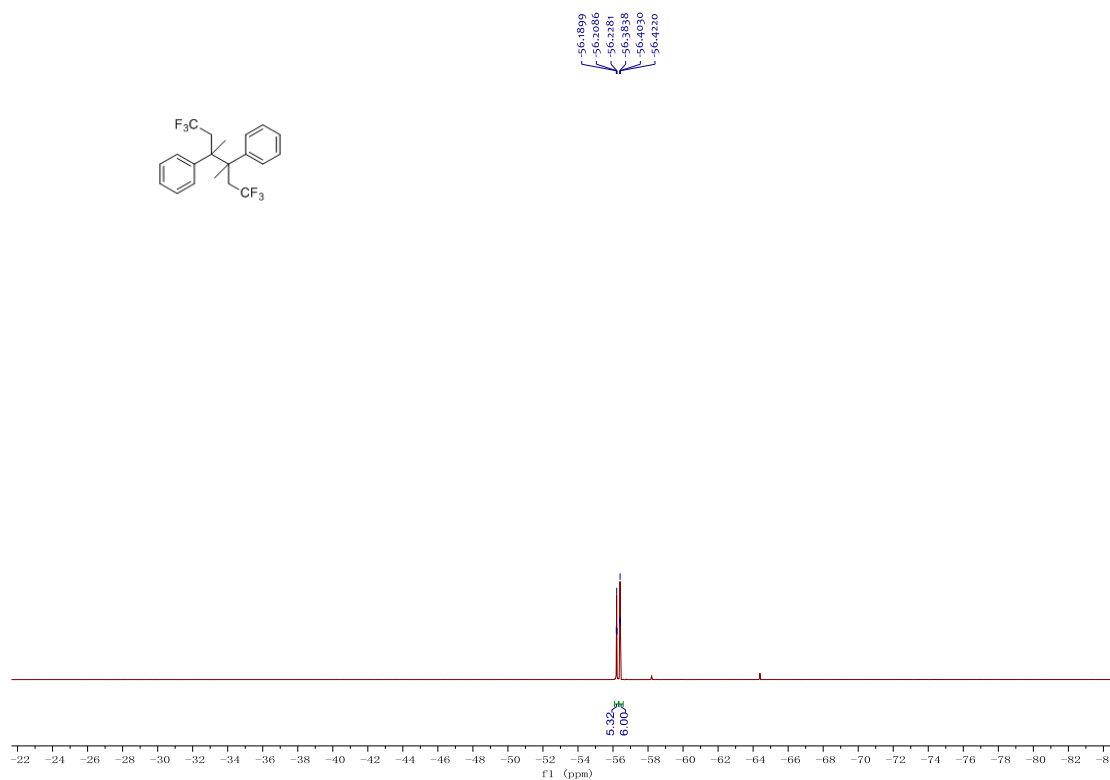

<sup>19</sup>F NMR spectrum (564 MHz, CDCl<sub>3</sub>) of **23**

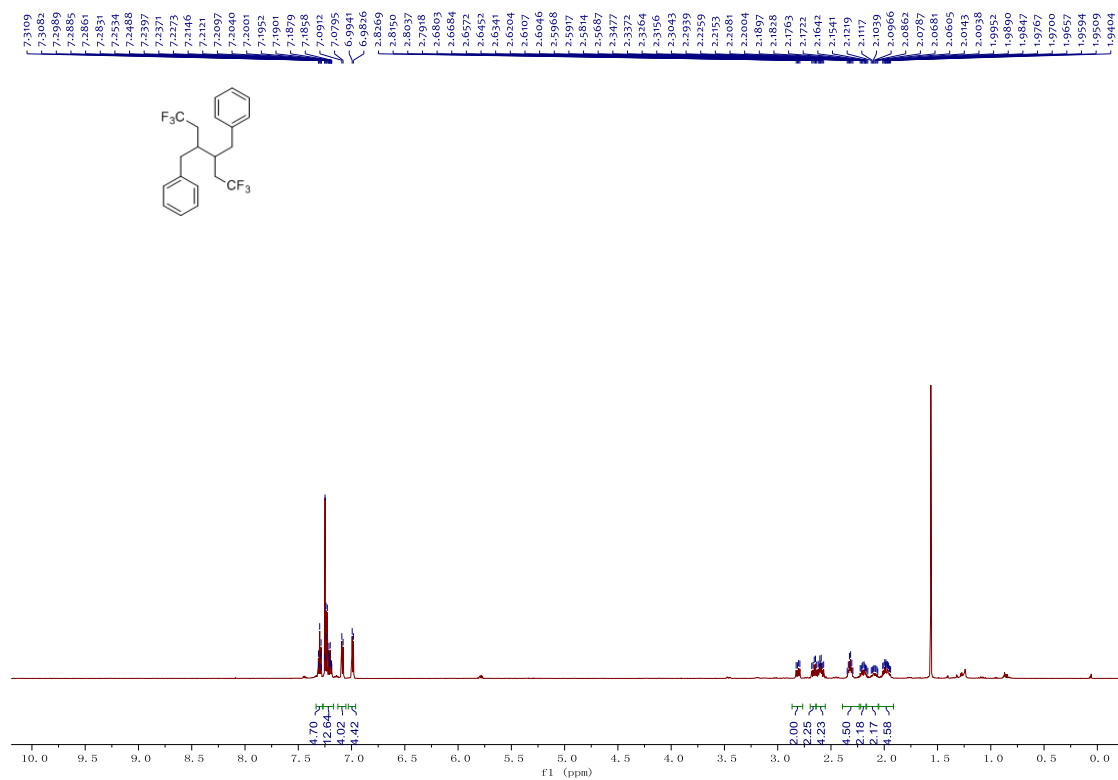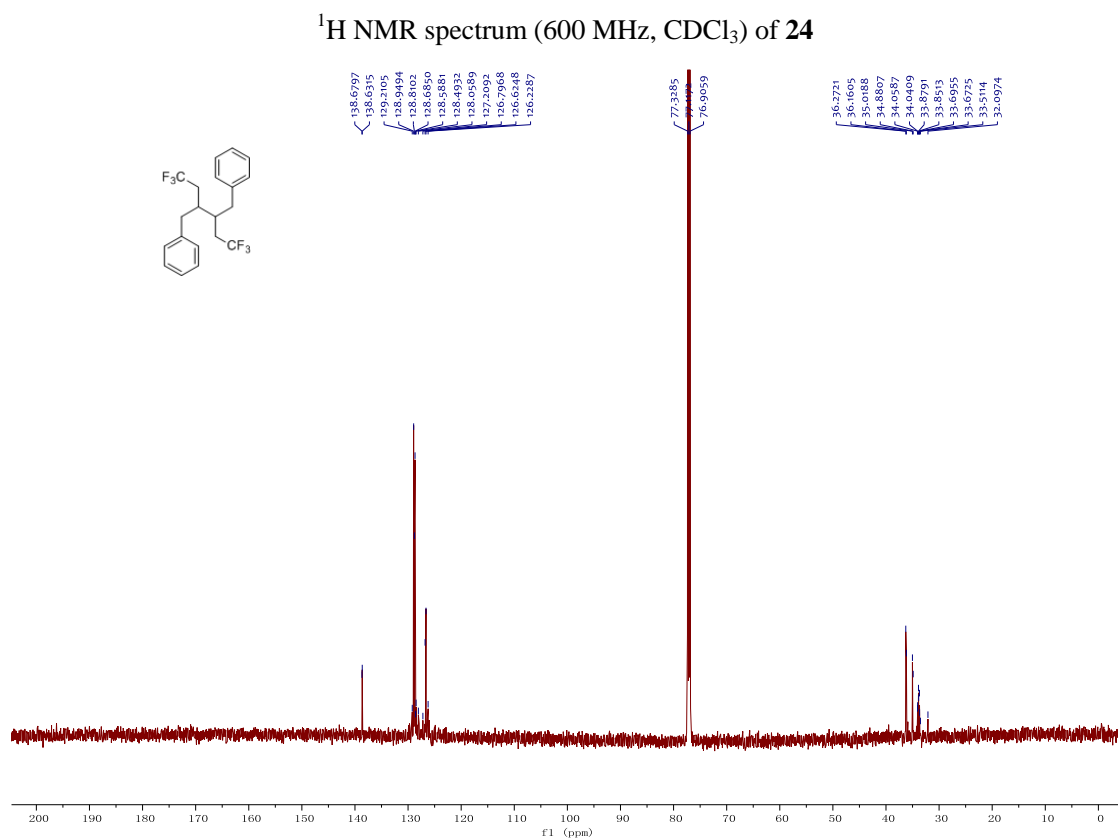

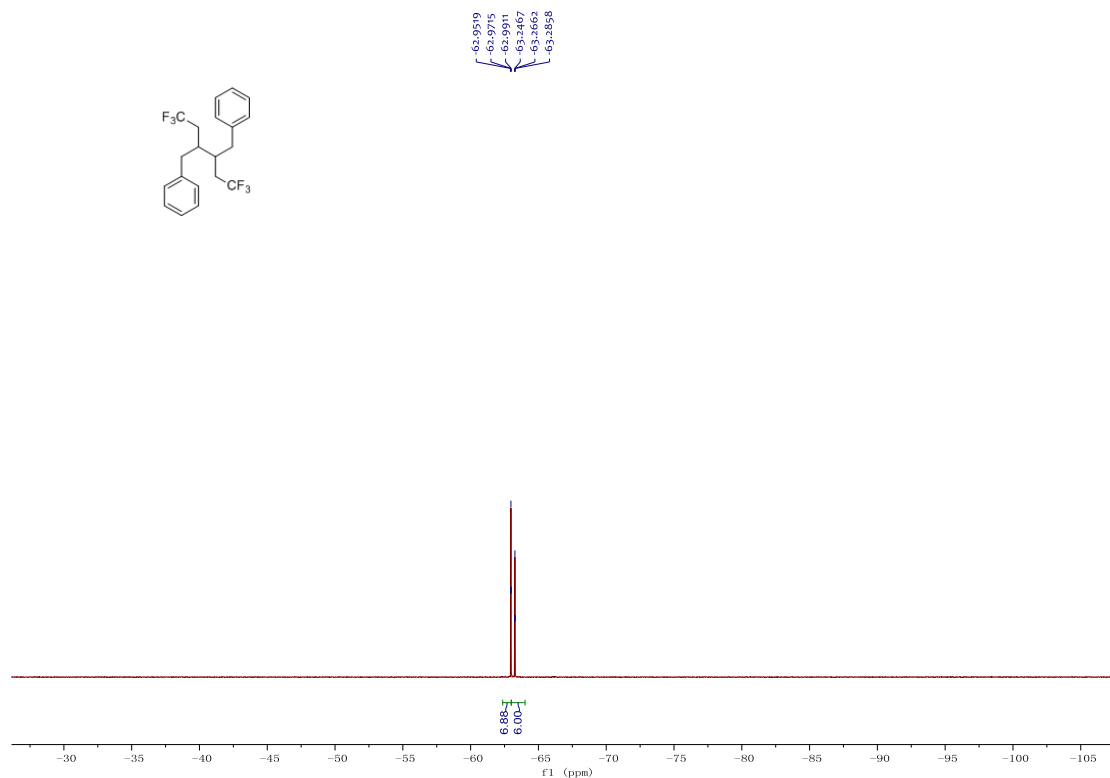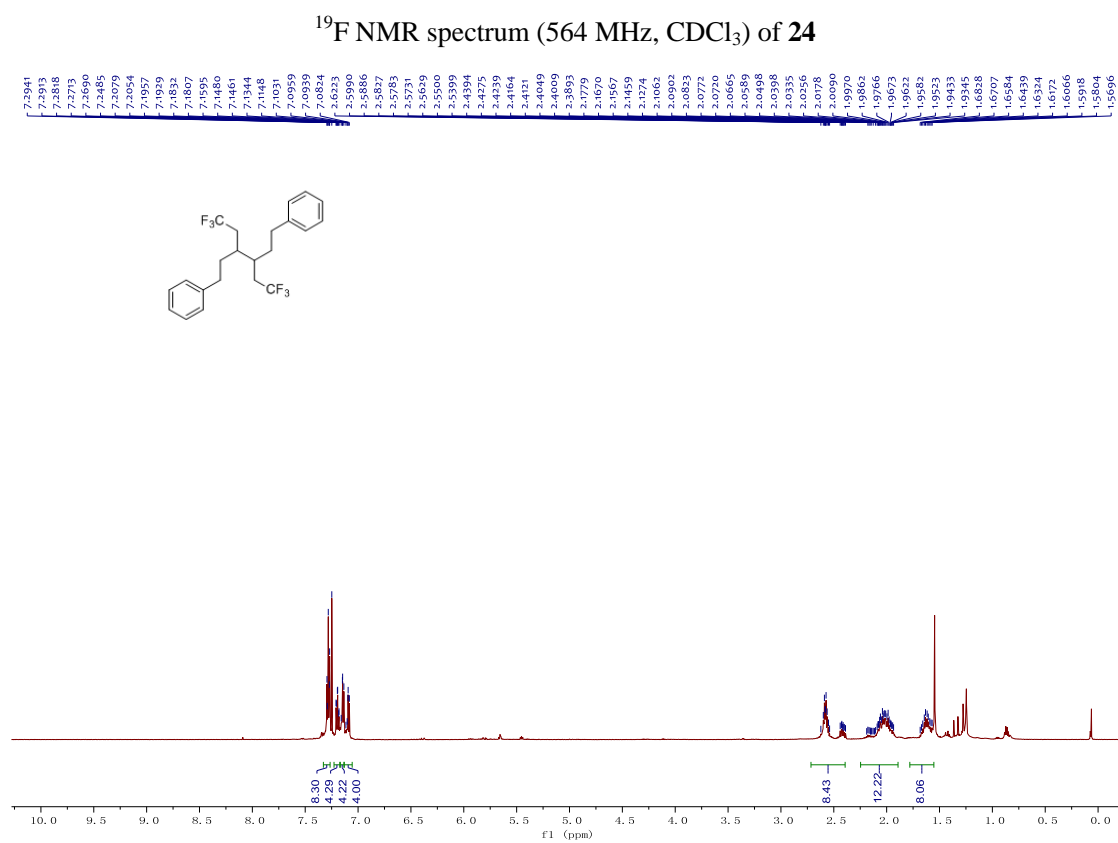

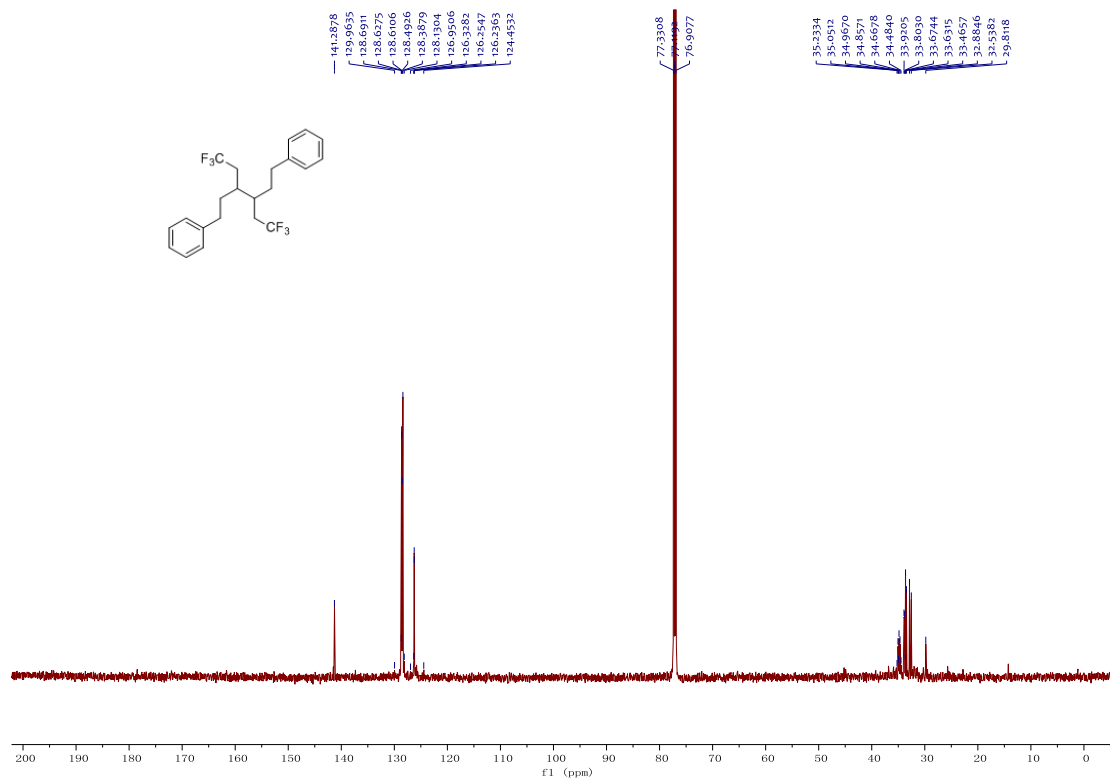

$^{13}\text{C}$  NMR spectrum (150 MHz,  $\text{CDCl}_3$ ) of **25**

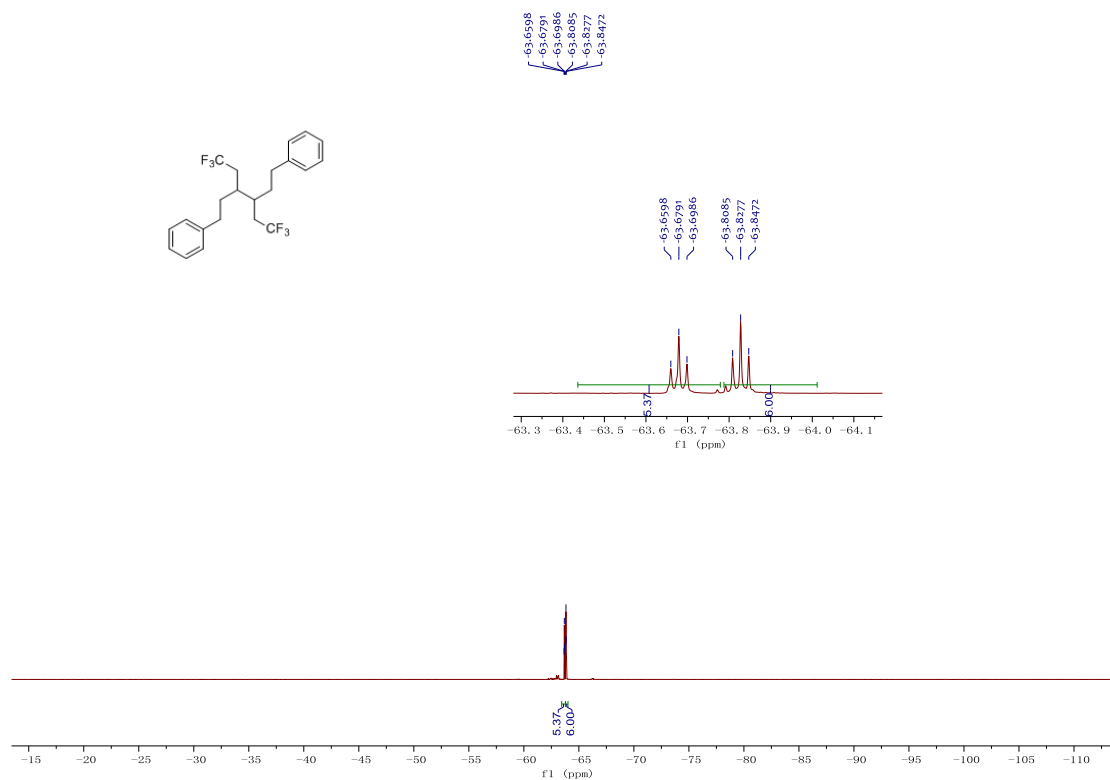

$^{19}\text{F}$  NMR spectrum (564 MHz,  $\text{CDCl}_3$ ) of **25**

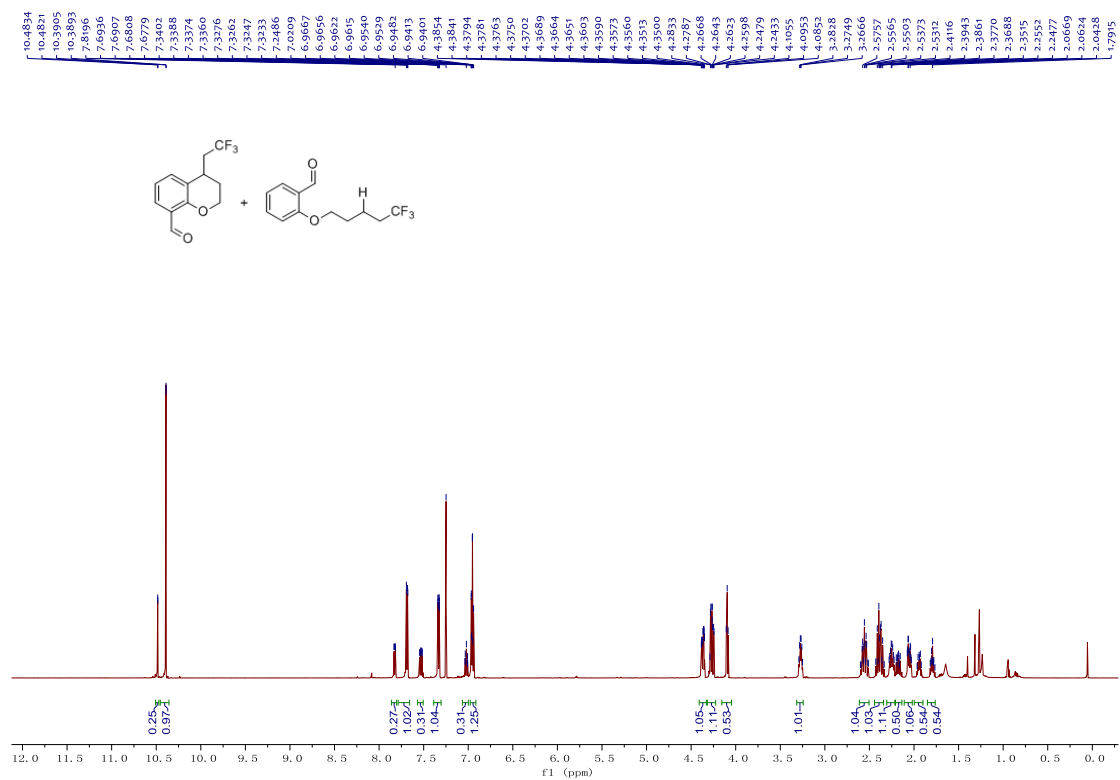

<sup>1</sup>H NMR spectrum (600 MHz, CDCl<sub>3</sub>) of 26+27

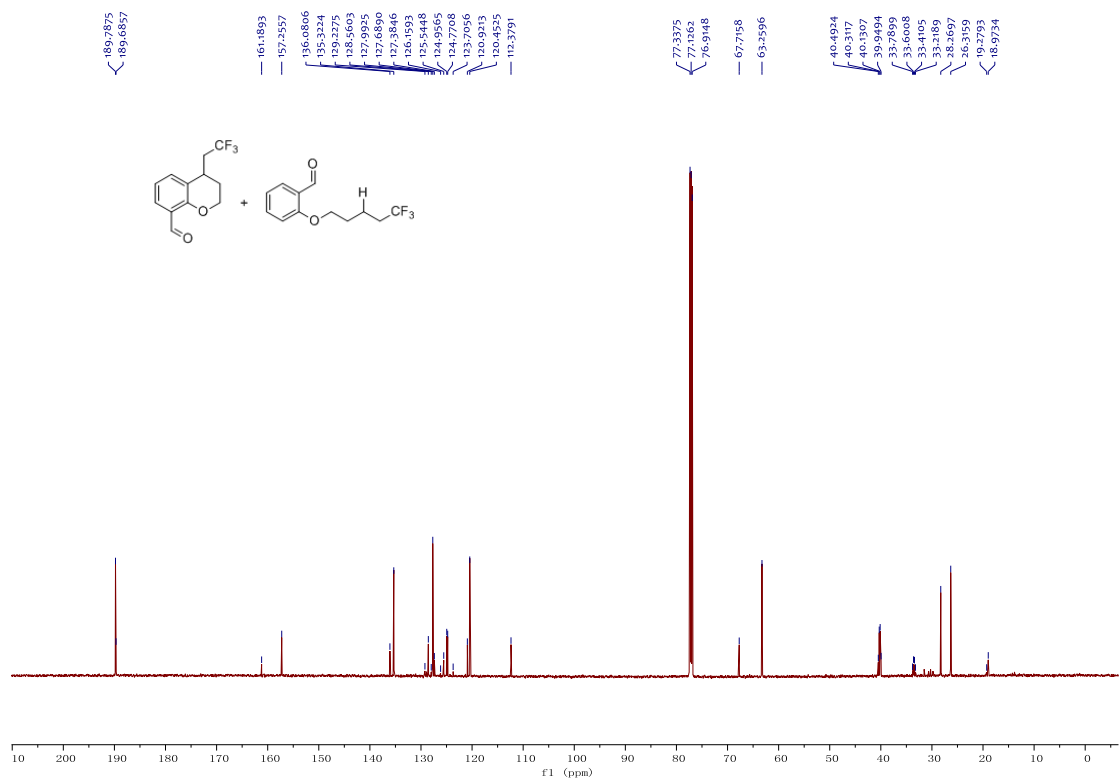

<sup>13</sup>C NMR spectrum (150 MHz, CDCl<sub>3</sub>) of 26+27

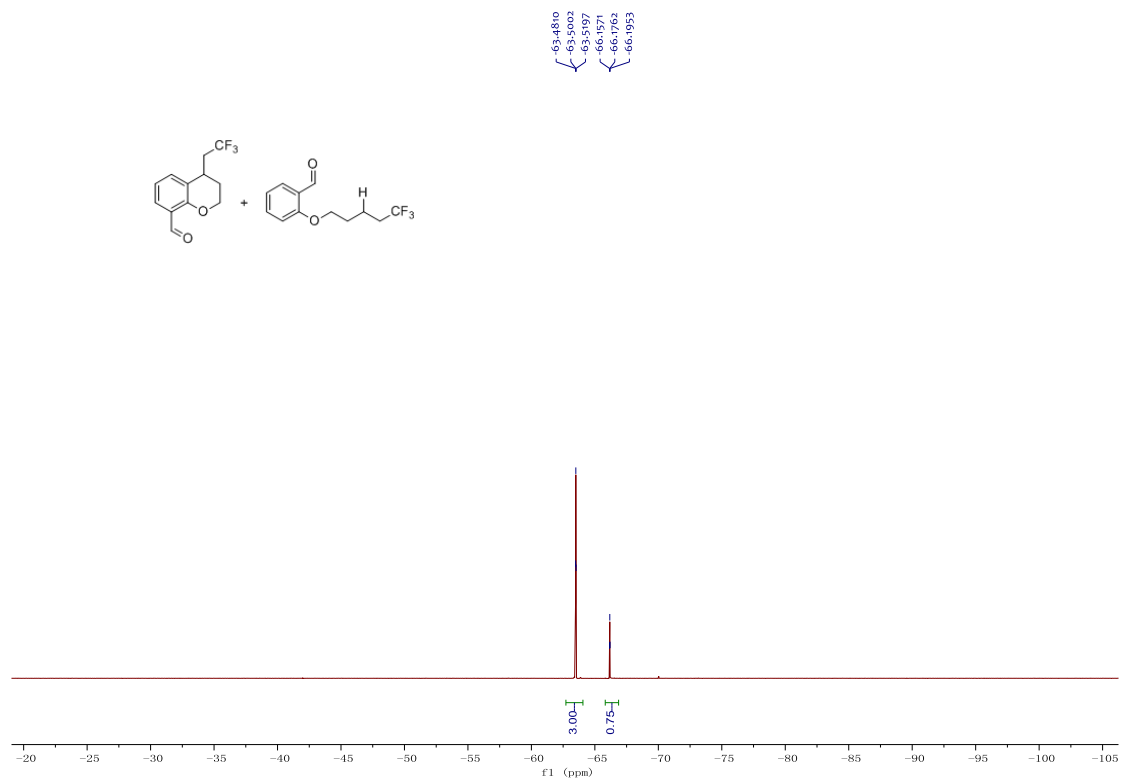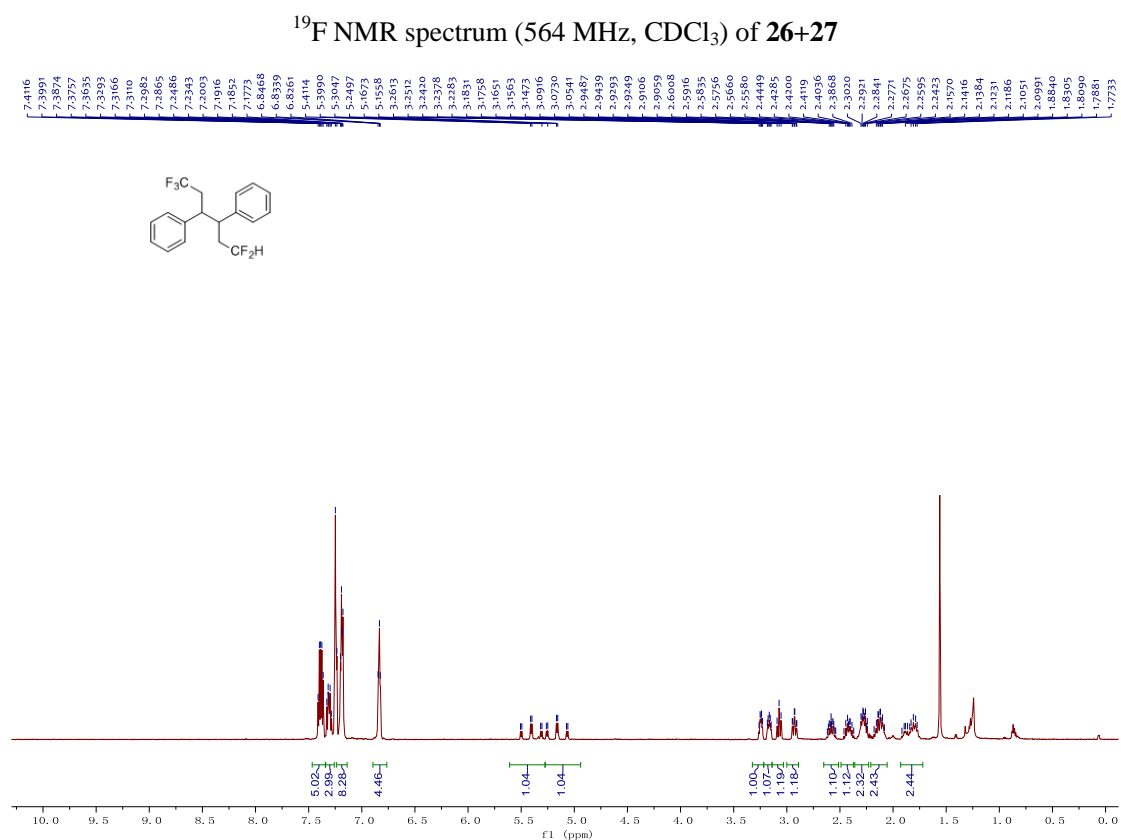

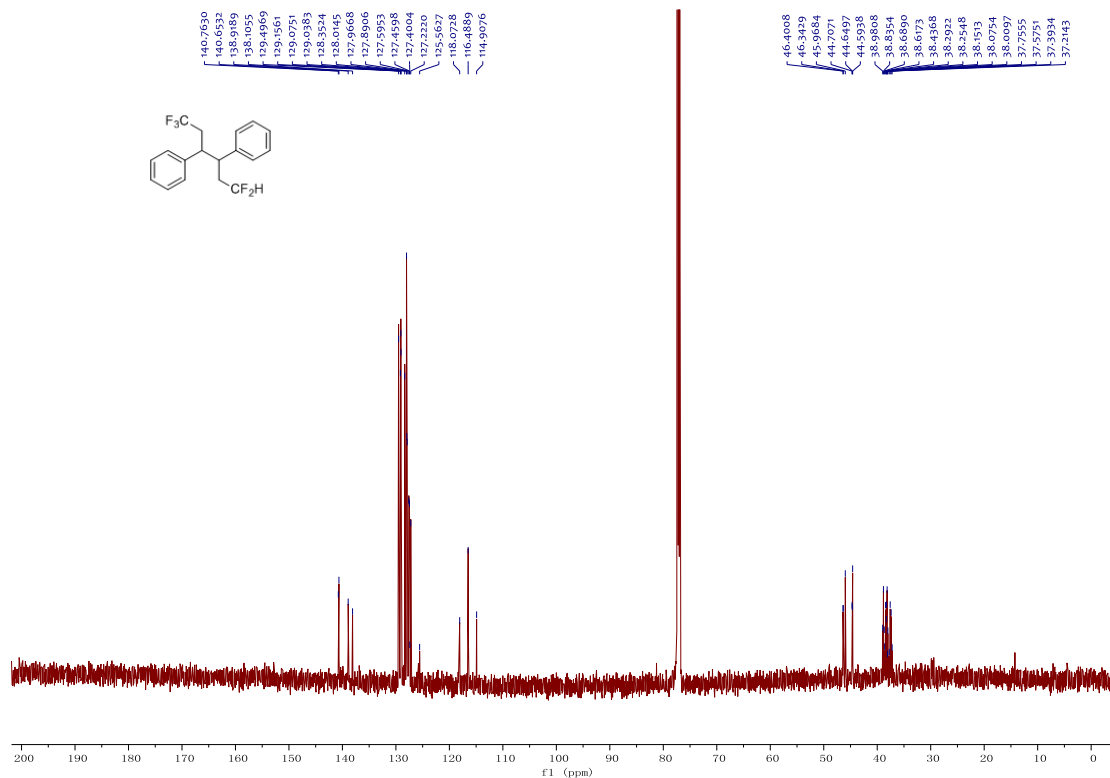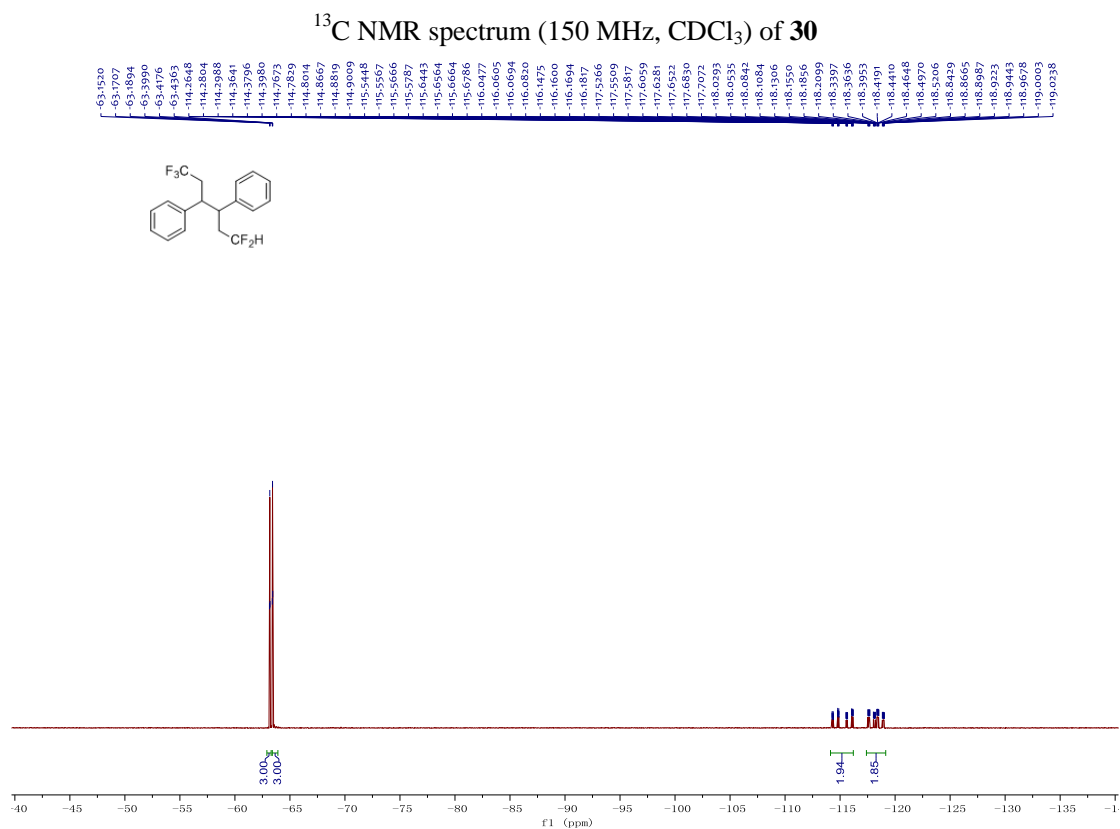

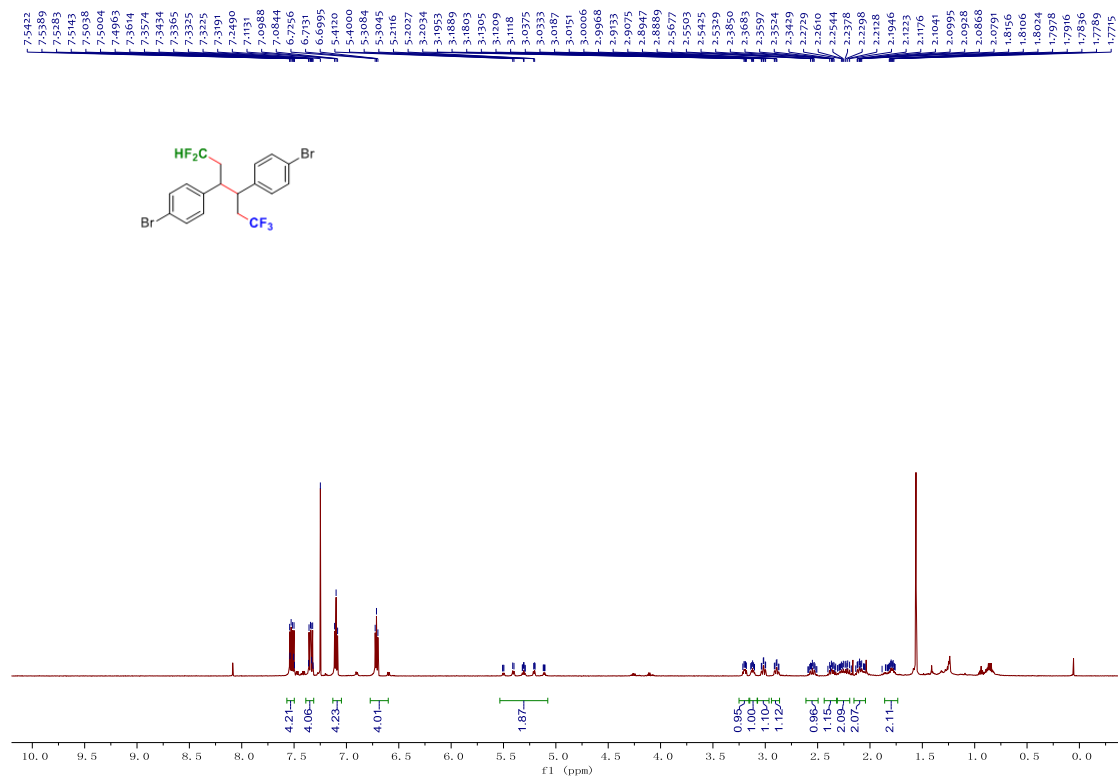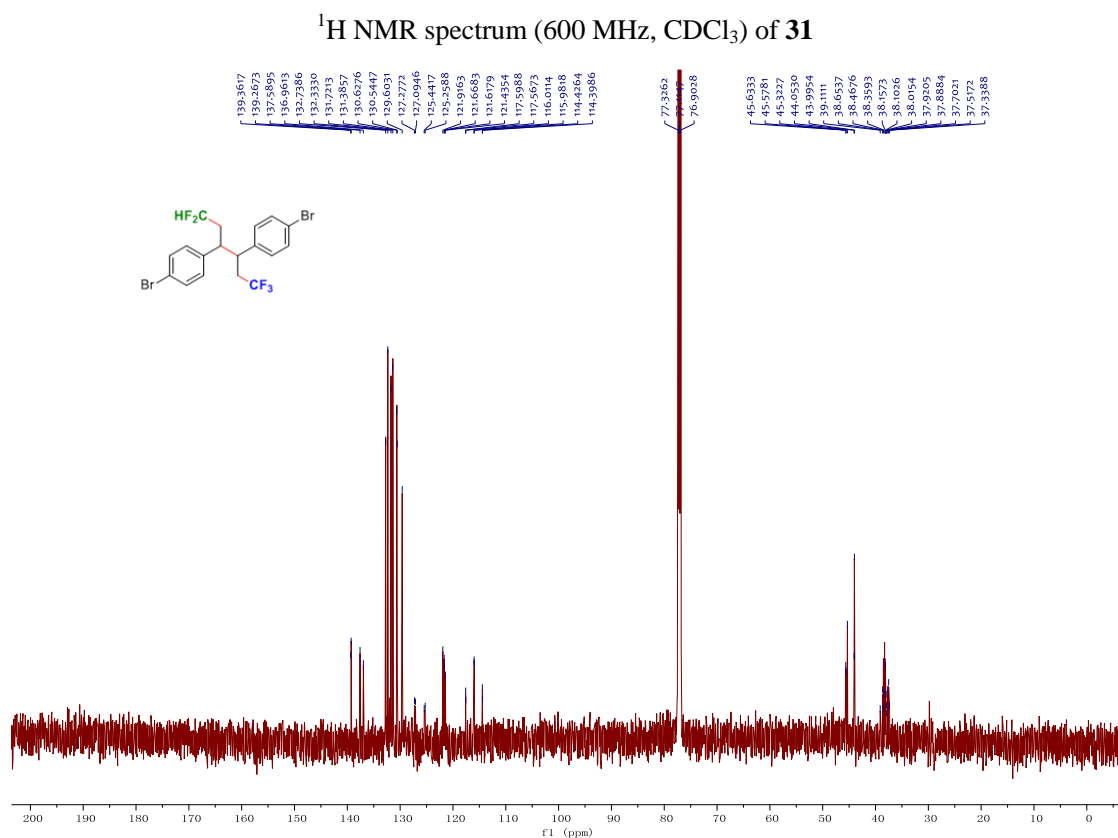



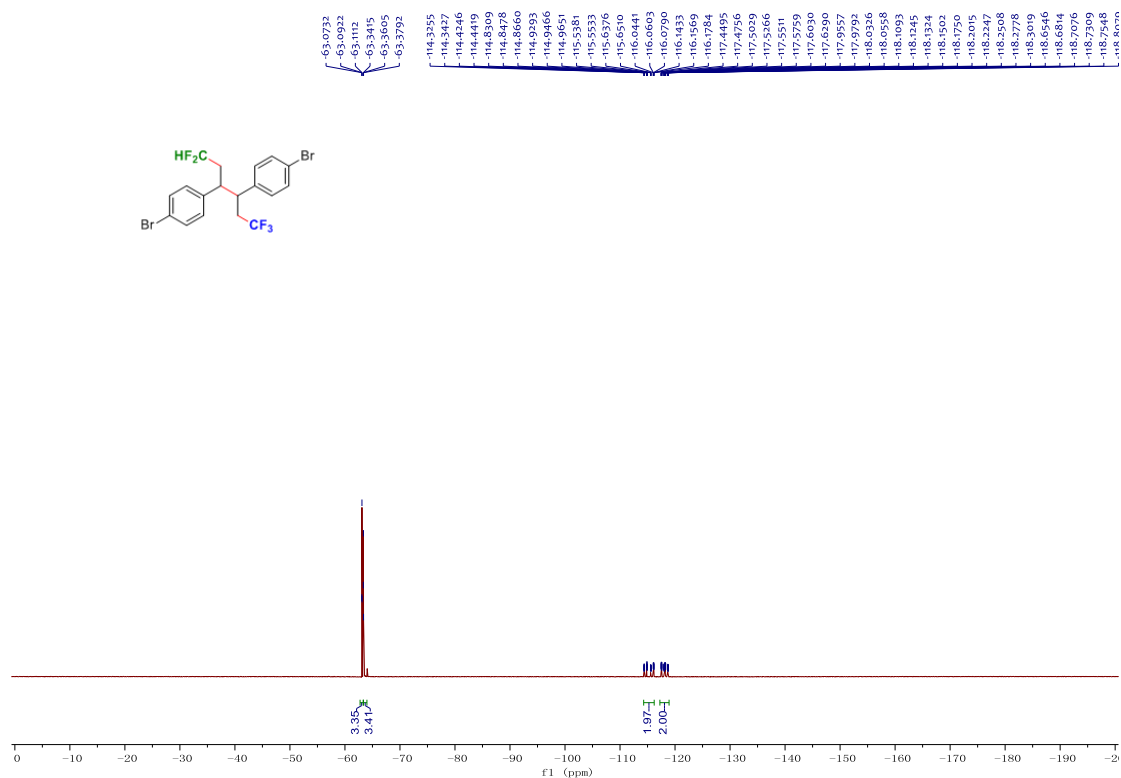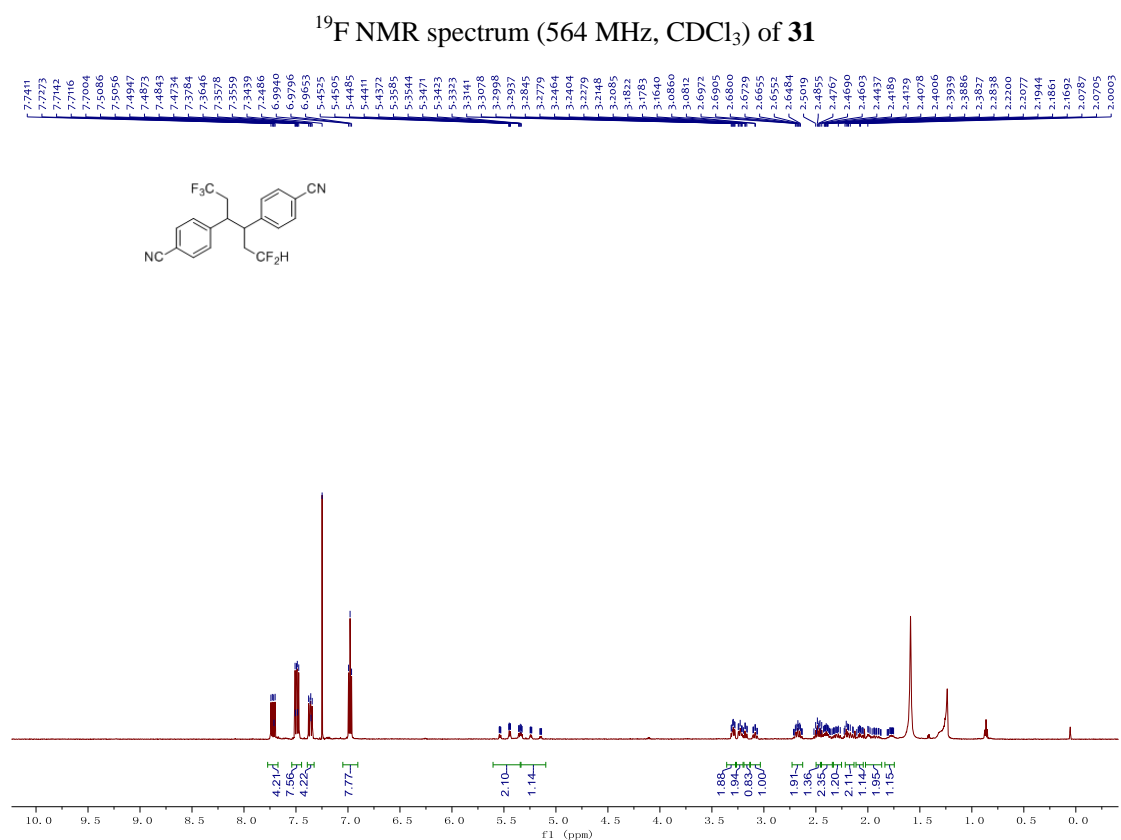

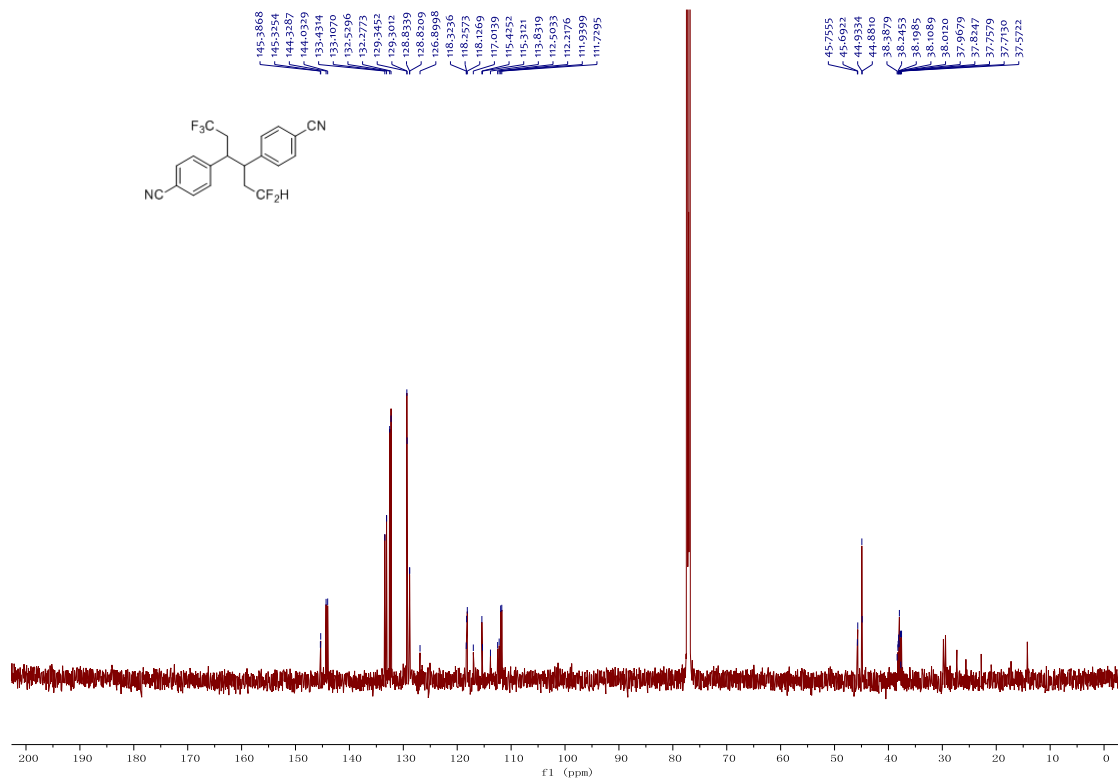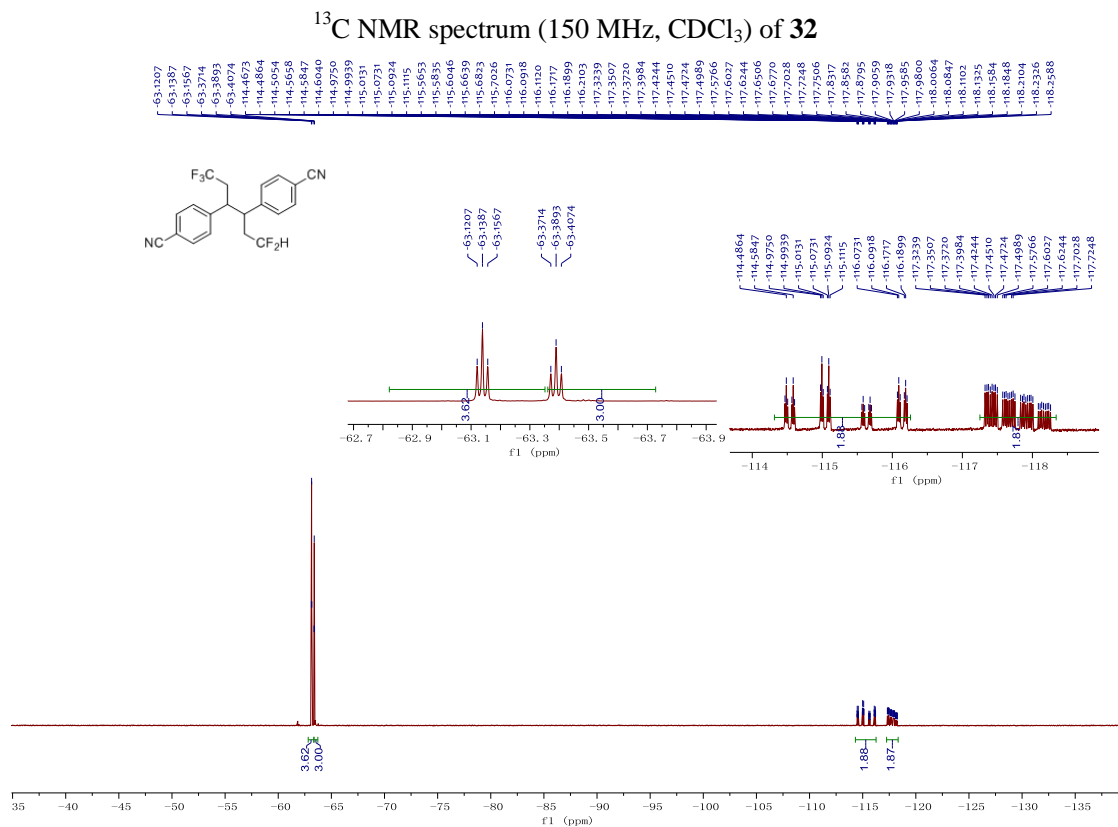

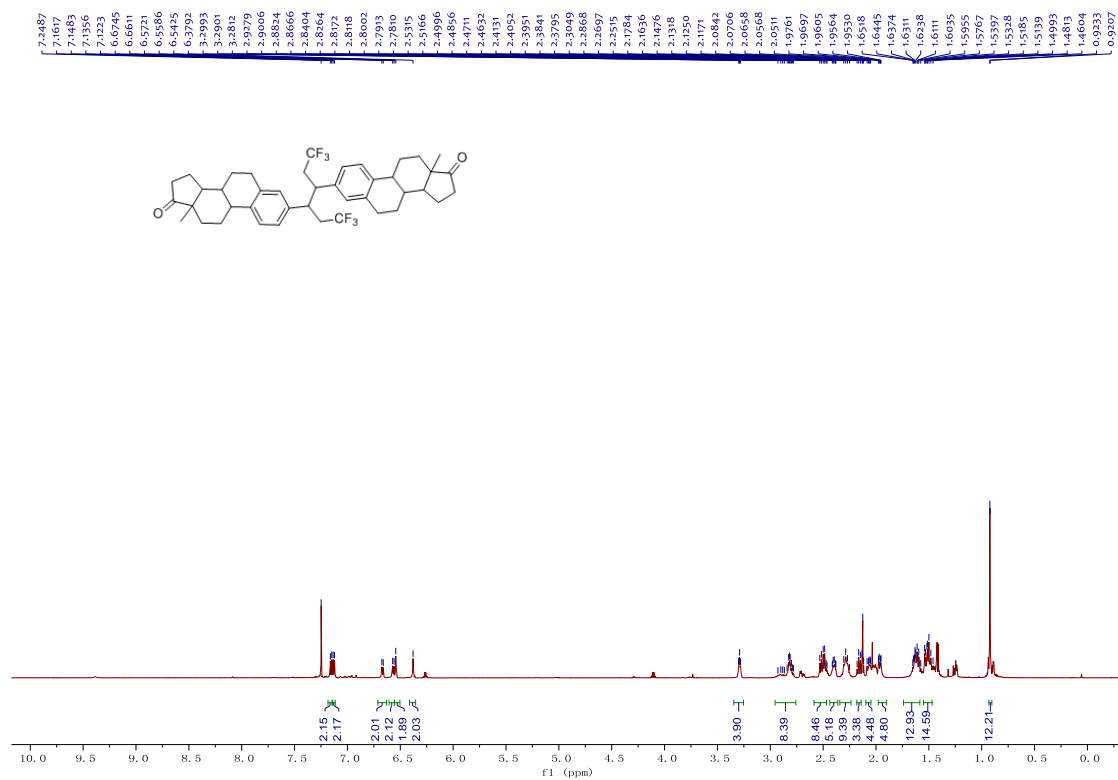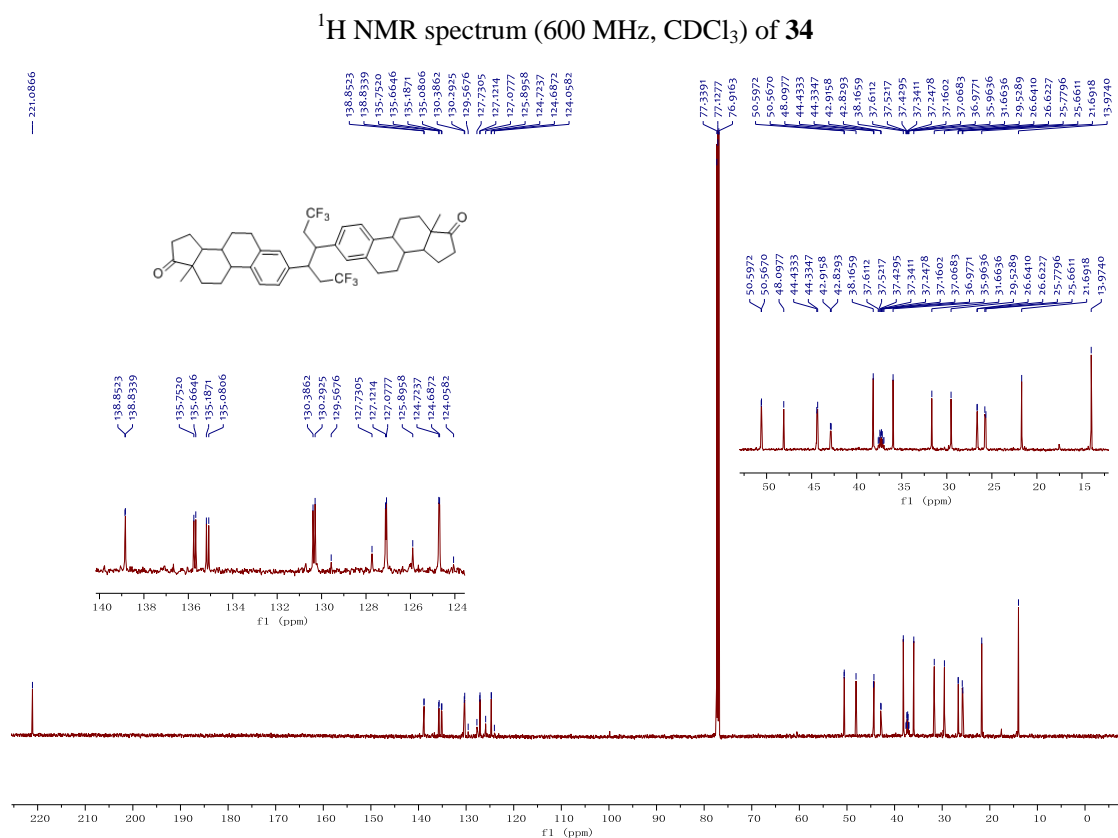

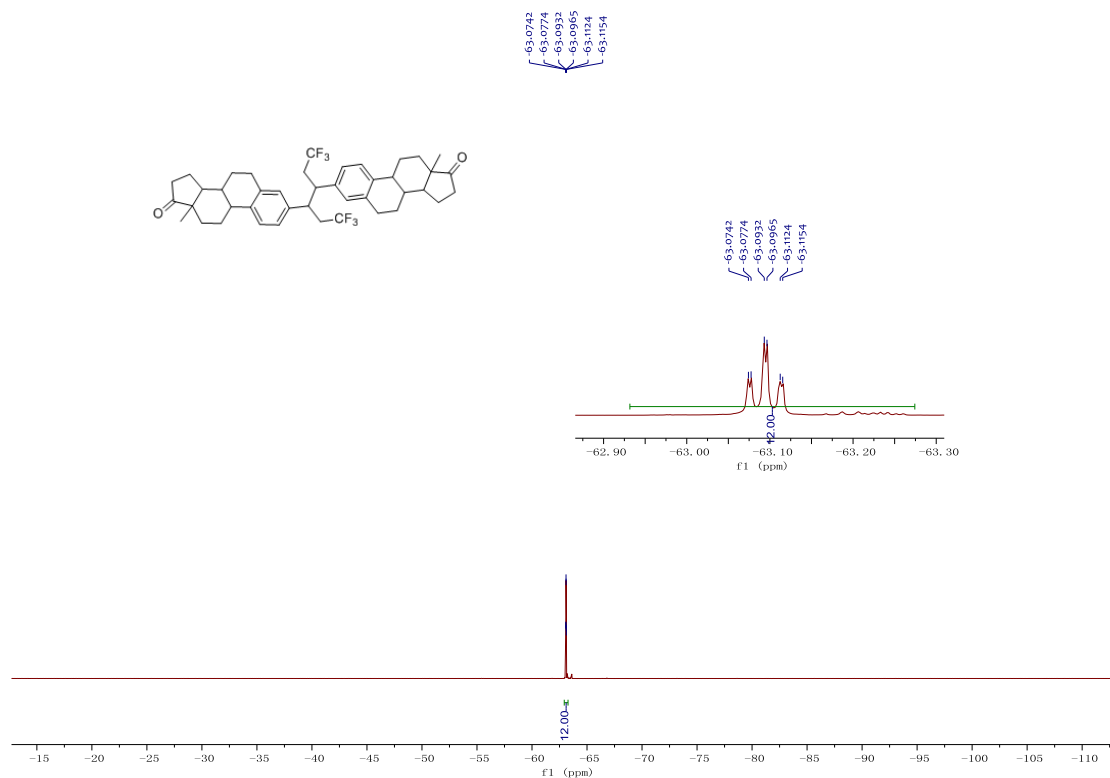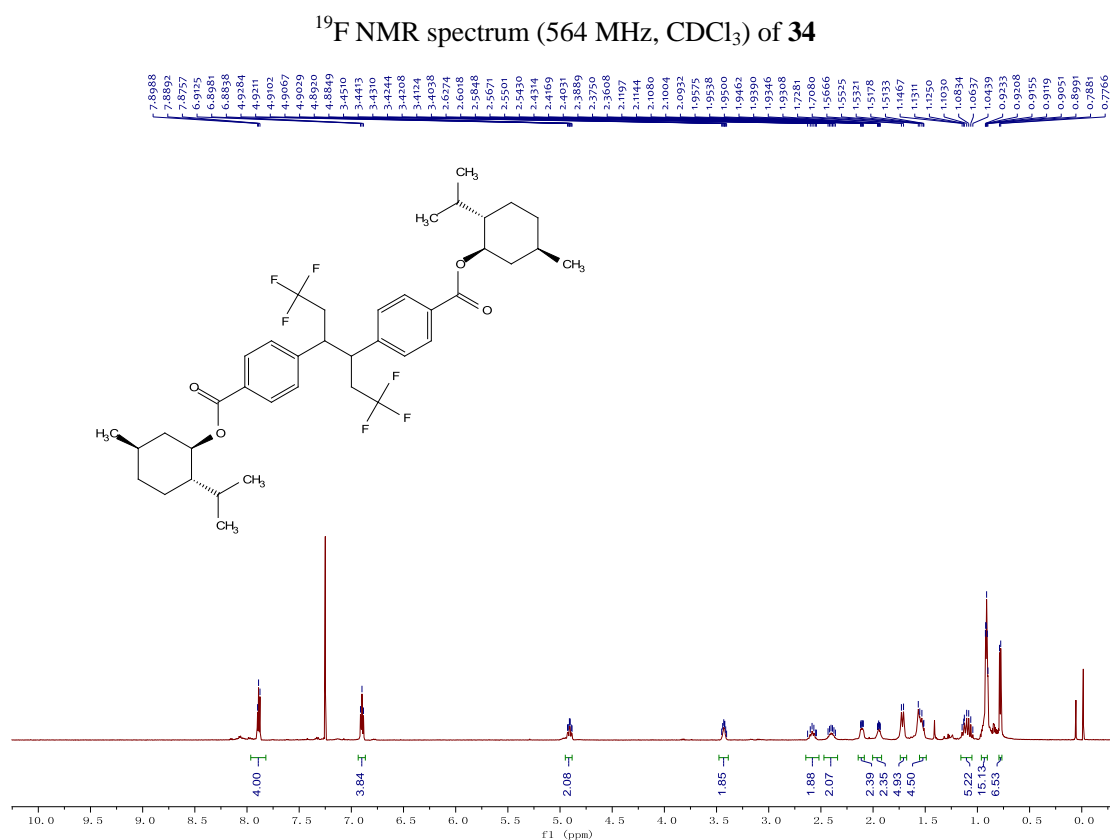

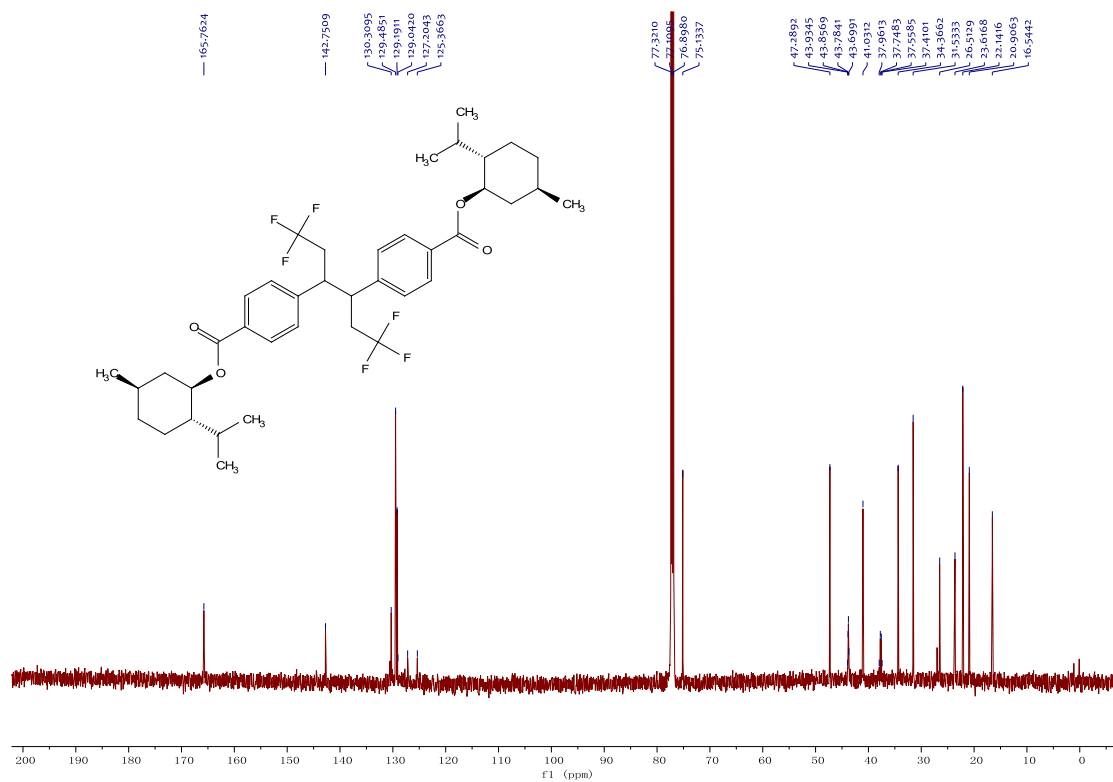

$^{13}\text{C}$  NMR spectrum (150 MHz,  $\text{CDCl}_3$ ) of **35**

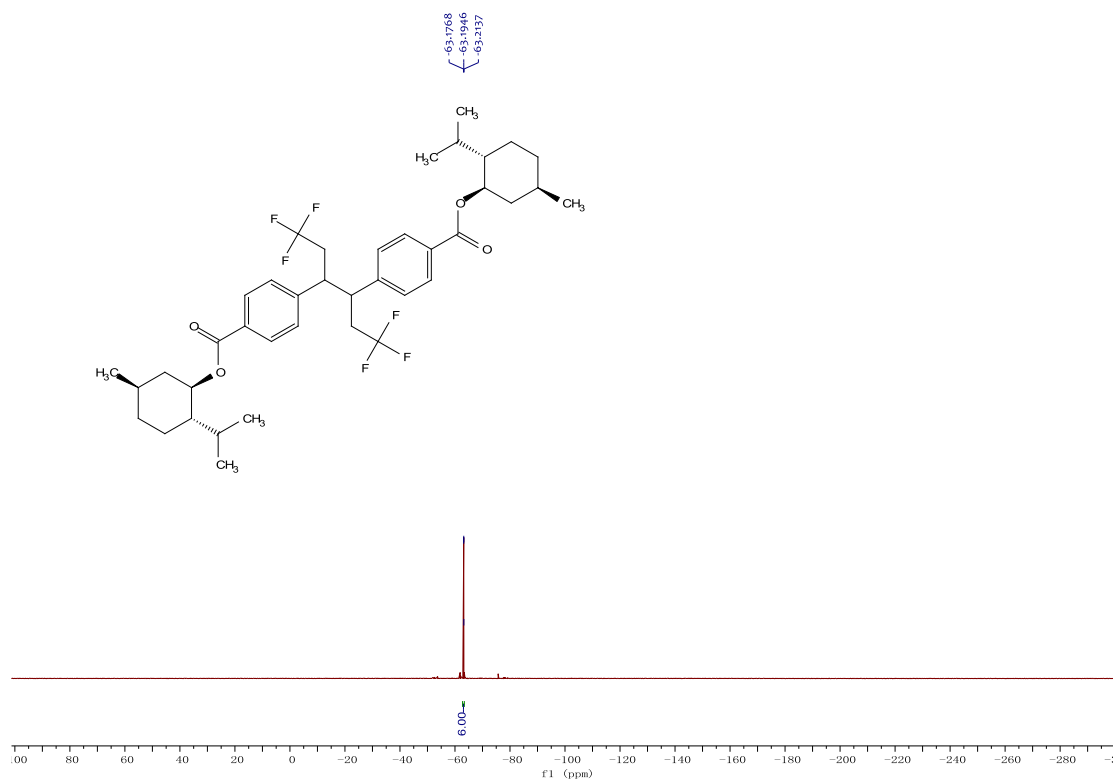

$^{19}\text{F}$  NMR spectrum (564 MHz,  $\text{CDCl}_3$ ) of **35**

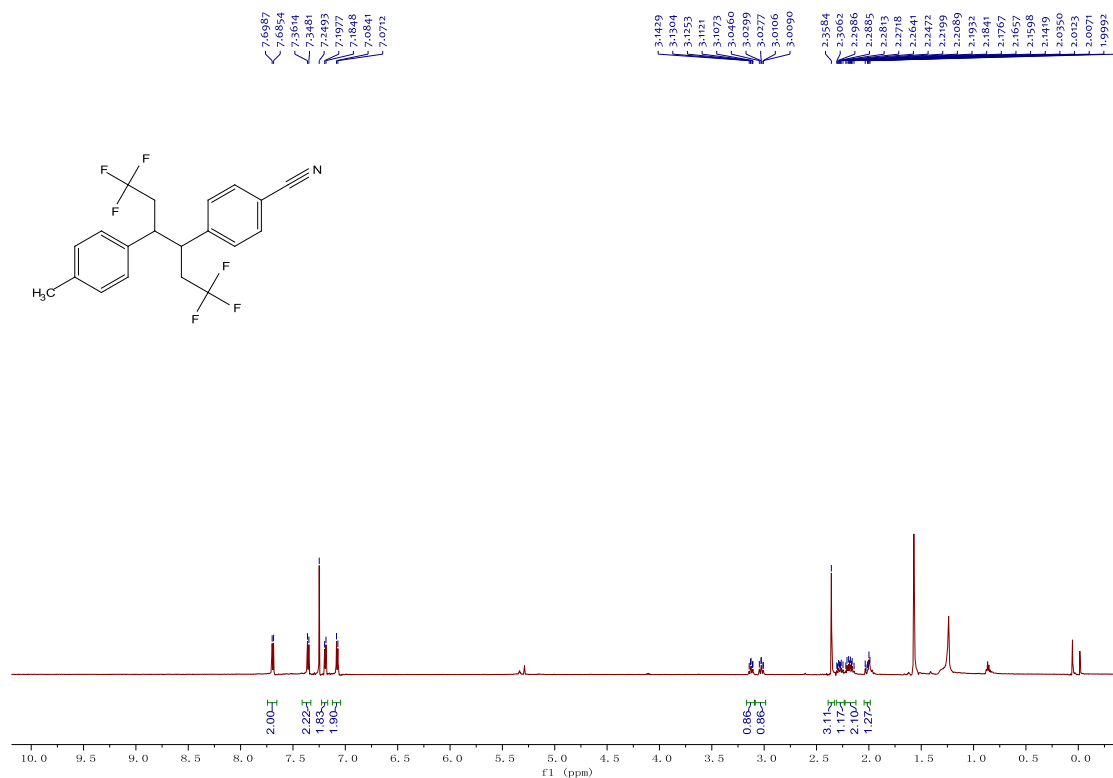

<sup>1</sup>H NMR spectrum (600 MHz, CDCl<sub>3</sub>) of **36** (anti)

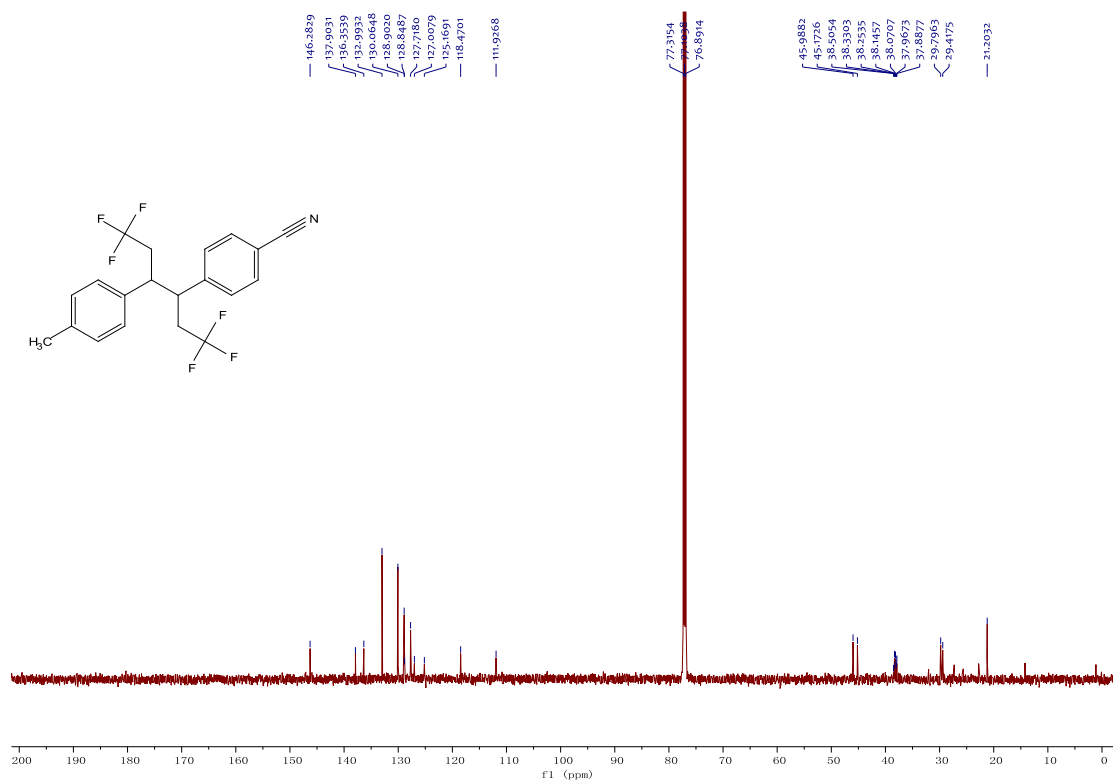

<sup>13</sup>C NMR spectrum (150 MHz, CDCl<sub>3</sub>) of **36** (anti)

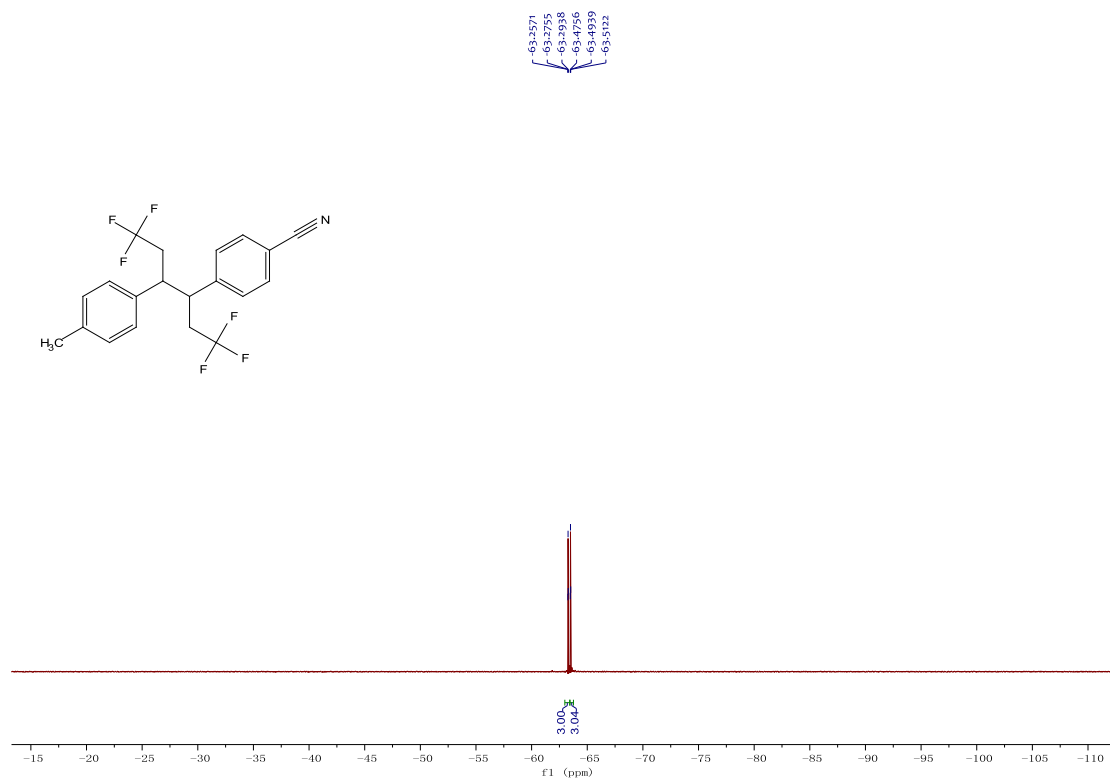

$^{19}\text{F}$  NMR spectrum (564 MHz,  $\text{CDCl}_3$ ) of **36** (anti)

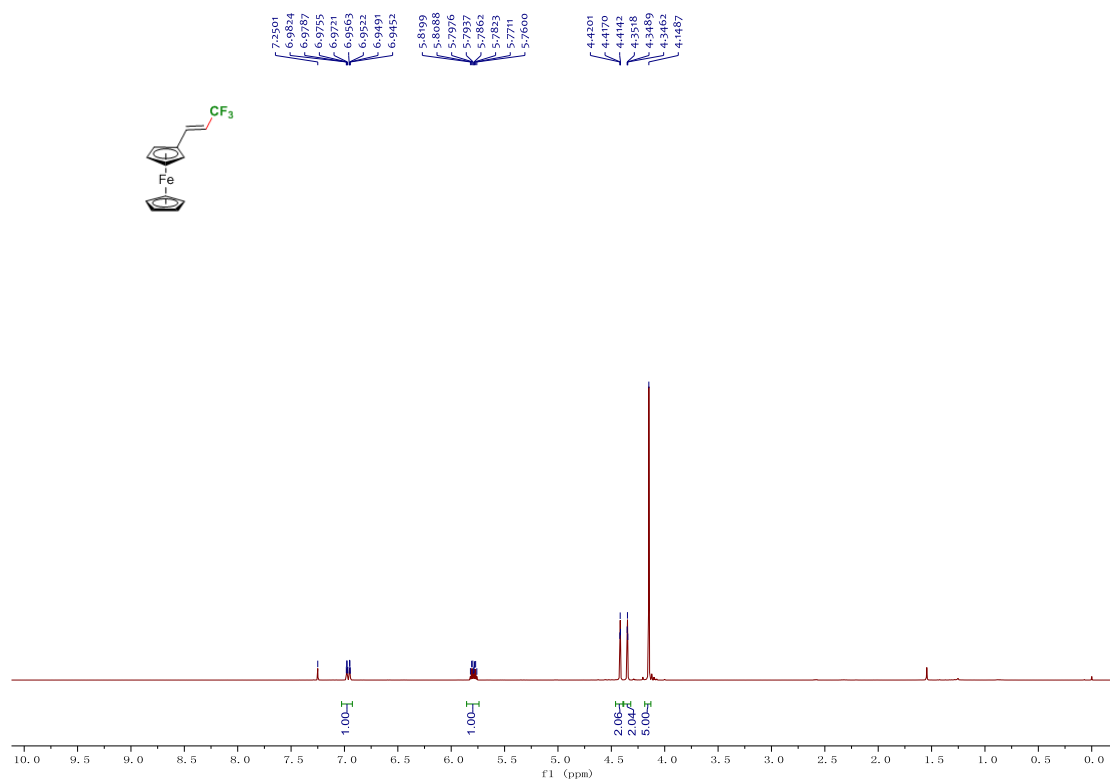

$^1\text{H}$  NMR spectrum (600 MHz,  $\text{CDCl}_3$ ) of **38**

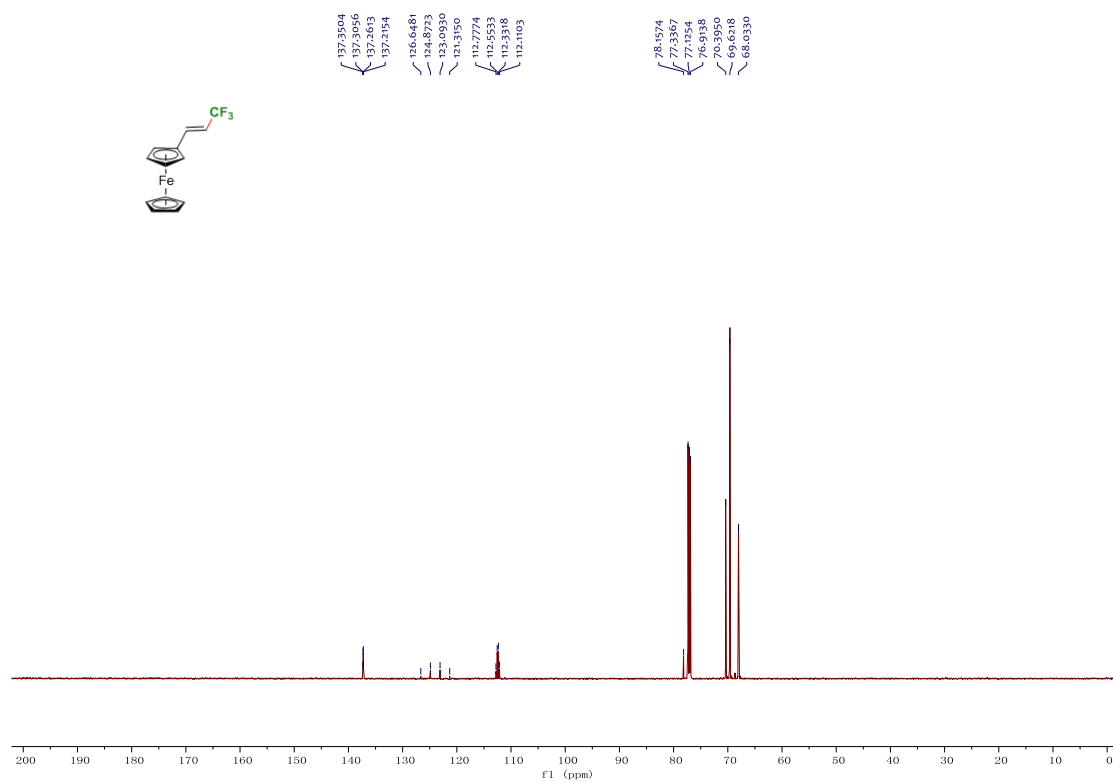

<sup>13</sup>C NMR spectrum (150 MHz, CDCl<sub>3</sub>) of **38**

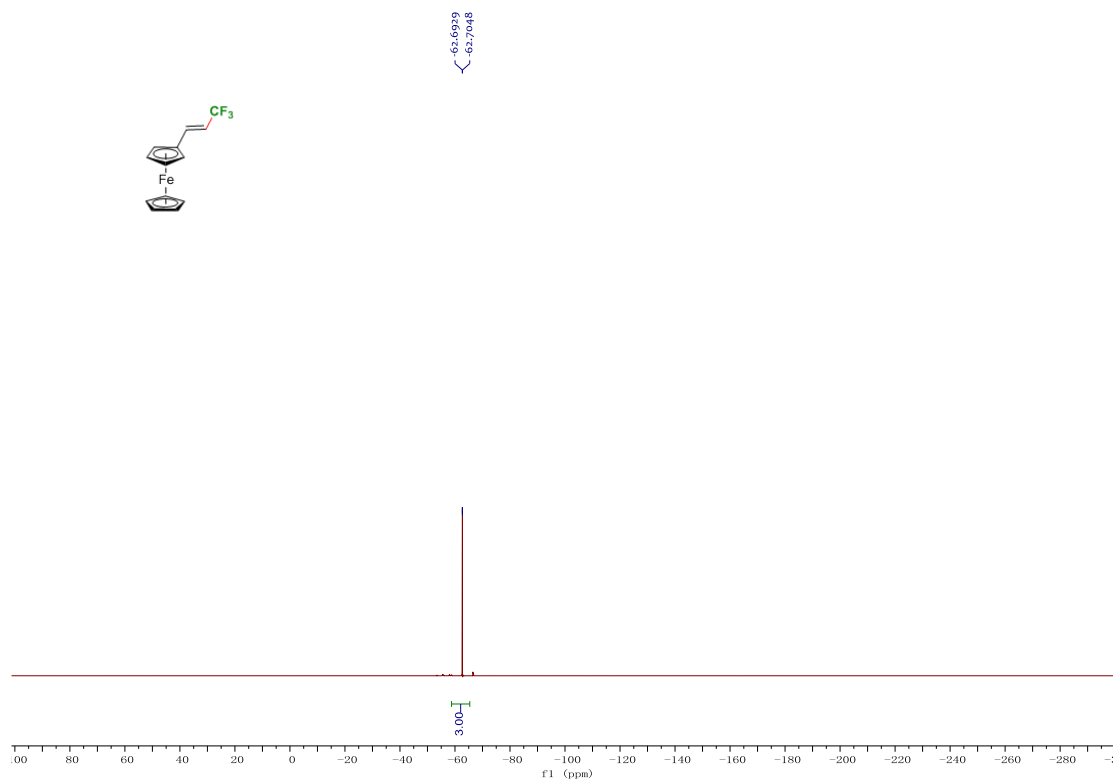

<sup>19</sup>F NMR spectrum (564 MHz, CDCl<sub>3</sub>) of **38**



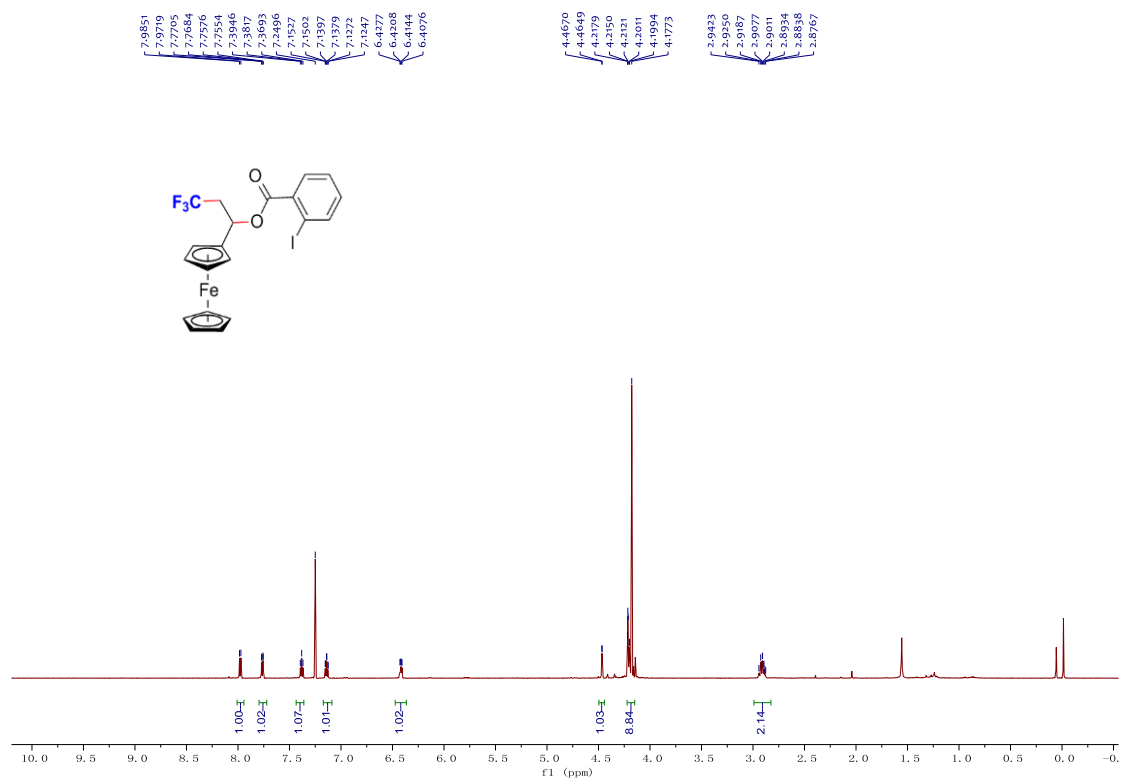

<sup>1</sup>H NMR spectrum (600 MHz, CDCl<sub>3</sub>) of **39**

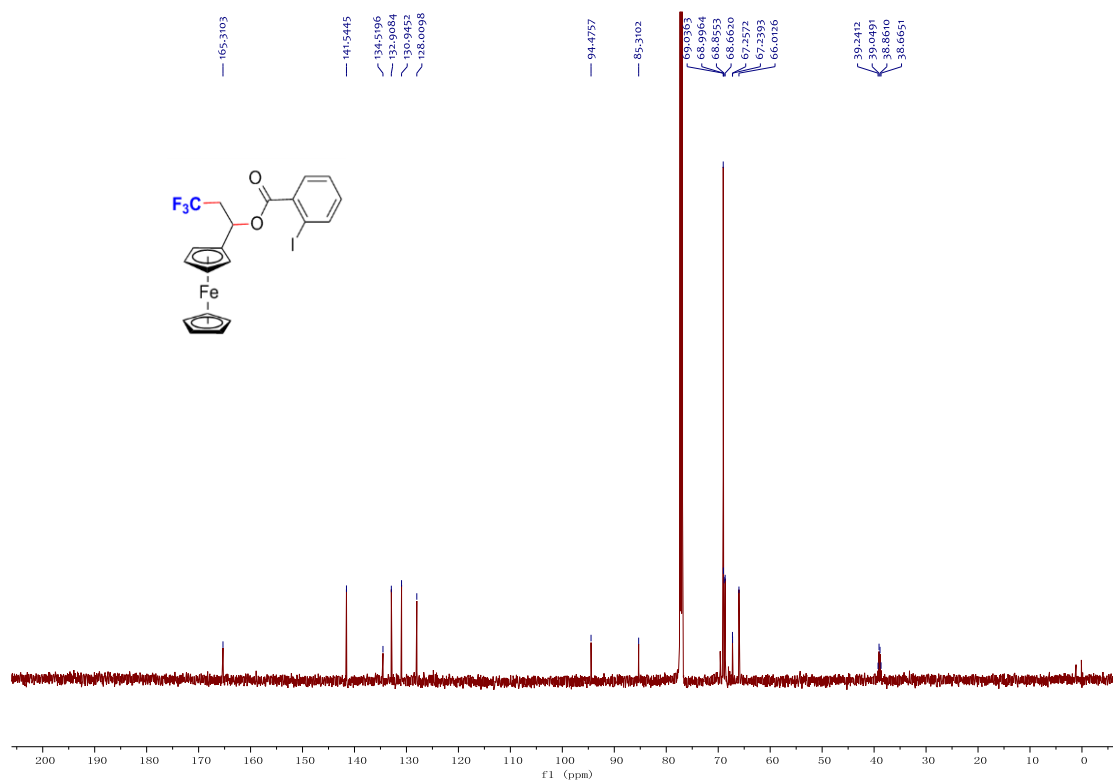

<sup>13</sup>C NMR spectrum (150 MHz, CDCl<sub>3</sub>) of **39**

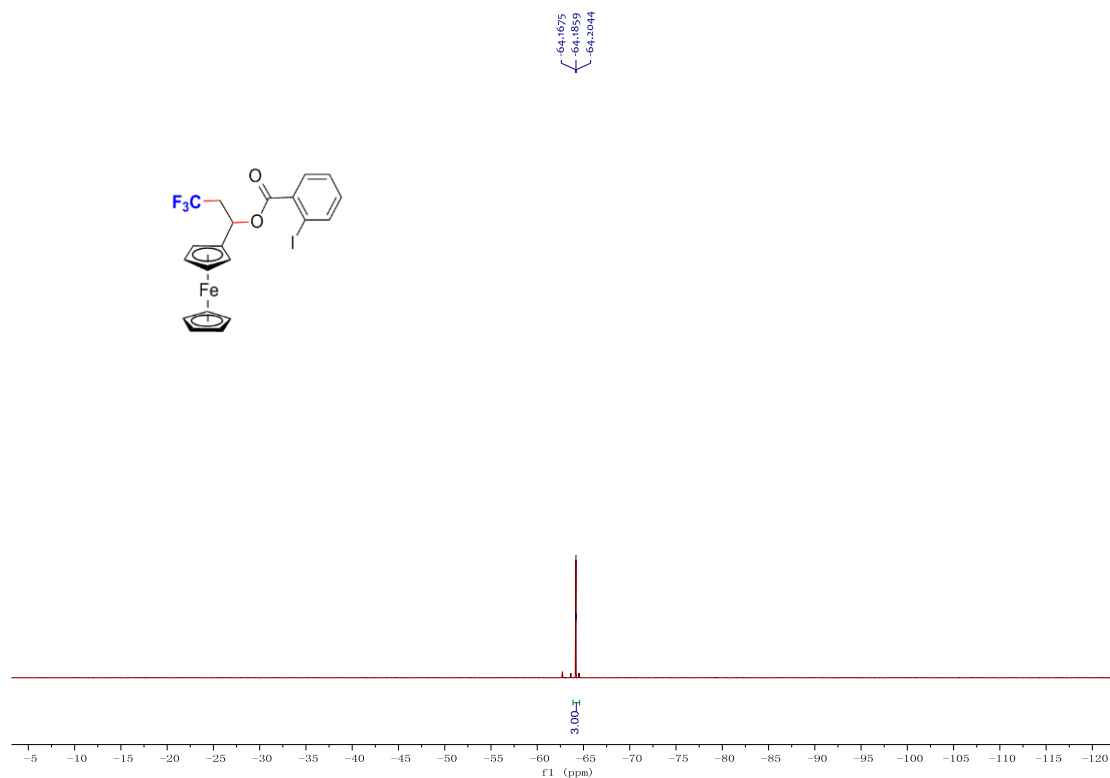

Supplement: d4qo00799a1.pdf [file d4qo00799a1.pdf]
